# Supplementary material for: Analysis of HIV Using a High Resolution Melting (HRM) Diversity Assay: Automation of HRM Data Analysis Enhances the Utility of the Assay for Analysis of HIV Incidence
Source: PLoS One. 2012 Dec 11;7(12):e51359. doi: 10.1371/journal.pone.0051359 (PMC3519891; doi:10.1371/journal.pone.0051359)
Supplement: Archive S1 — Test dataset for analysis with the HRM Diversity Assay Analysis Tool (DivMelt). Artificial diverse DNA populations were created by mixing mutagenized and wildtype HIV-derived plasmids. The diverse DNA populations were amplified and analyzed with the HRM diversity assay. These data files were exported from the LightScanner Instrument and Analysis Software (BioFire Diagnostics, Salt Lake City, UT) package and serve as input data for DivMelt. (ZIP) [file pone.0051359.s001.zip]

Archive with 4 entries (4 files):
- Archive_S1/DivMelt_test_data.ABT
- Archive_S1/DivMelt_test_data.FLO
- Archive_S1/DivMelt_test_data.TEM
- Archive_S1/DivMelt_test_dataset_description.pdf
