# Supplementary material for: Analysis of HIV Using a High Resolution Melting (HRM) Diversity Assay: Automation of HRM Data Analysis Enhances the Utility of the Assay for Analysis of HIV Incidence
Source: PLoS One. 2012 Dec 11;7(12):e51359. doi: 10.1371/journal.pone.0051359 (PMC3519891; doi:10.1371/journal.pone.0051359)
Supplement: Archive S1 — Test dataset for analysis with the HRM Diversity Assay Analysis Tool (DivMelt). Artificial diverse DNA populations were created by mixing mutagenized and wildtype HIV-derived plasmids. The diverse DNA populations were amplified and analyzed with the HRM diversity assay. These data files were exported from the LightScanner Instrument and Analysis Software (BioFire Diagnostics, Salt Lake City, UT) package and serve as input data for DivMelt. (ZIP) [file pone.0051359.s001.zip › Archive_S1/DivMelt_test_data.ABT]

^User:
^Date:
^Time:
^Machine:
^Run Version:
^Analysis Date:
^Sample Data:
WT_100bp_POL	1	U	0	0
WT+AtoG(50:50)_100bp_POL	2	U	0	0
WT+AtoC(50:50)_100bp_POL	3	U	0	0
WT+AtoT(50:50)_100bp_POL	4	U	0	0
WT+del1bp(50:50)_100bp_POL	5	U	0	0
WT+ins3bp(50:50)_100bp_POL	6	U	0	0
WT+ins9bp(50:50)_100bp_POL	7	U	0	0
NTC	8	U	0	0
WT_100bp_POL	9	U	0	0
WT+AtoG(50:50)_100bp_POL	10	U	0	0
WT+AtoC(50:50)_100bp_POL	11	U	0	0
WT+AtoT(50:50)_100bp_POL	12	U	0	0
WT+del1bp(50:50)_100bp_POL	13	U	0	0
WT+ins3bp(50:50)_100bp_POL	14	U	0	0
WT+ins9bp(50:50)_100bp_POL	15	U	0	0
NTC	16	U	0	0
WT_200bp_POL	17	U	0	0
WT+AtoG(50:50)_200bp_POL	18	U	0	0
WT+AtoC(50:50)_200bp_POL	19	U	0	0
WT+AtoT(50:50)_200bp_POL	20	U	0	0
WT+del1bp(50:50)_200bp_POL	21	U	0	0
WT+ins3bp(50:50)_200bp_POL	22	U	0	0
WT+ins9bp(50:50)_200bp_POL	23	U	0	0
NTC	24	U	0	0
WT_200bp_POL	25	U	0	0
WT+AtoG(50:50)_200bp_POL	26	U	0	0
WT+AtoC(50:50)_200bp_POL	27	U	0	0
WT+AtoT(50:50)_200bp_POL	28	U	0	0
WT+del1bp(50:50)_200bp_POL	29	U	0	0
WT+ins3bp(50:50)_200bp_POL	30	U	0	0
WT+ins9bp(50:50)_200bp_POL	31	U	0	0
NTC	32	U	0	0
WT_300bp_POL	33	U	0	0
WT+AtoG(50:50)_300bp_POL	34	U	0	0
WT+AtoC(50:50)_300bp_POL	35	U	0	0
WT+AtoT(50:50)_300bp_POL	36	U	0	0
WT+del1bp(50:50)_300bp_POL	37	U	0	0
WT+ins3bp(50:50)_300bp_POL	38	U	0	0
WT+ins9bp(50:50)_300bp_POL	39	U	0	0
NTC	40	U	0	0
WT_300bp_POL	41	U	0	0
WT+AtoG(50:50)_300bp_POL	42	U	0	0
WT+AtoC(50:50)_300bp_POL	43	U	0	0
WT+AtoT(50:50)_300bp_POL	44	U	0	0
WT+del1bp(50:50)_300bp_POL	45	U	0	0
WT+ins3bp(50:50)_300bp_POL	46	U	0	0
WT+ins9bp(50:50)_300bp_POL	47	U	0	0
NTC	48	U	0	0
WT_400bp_POL	49	U	0	0
WT+AtoG(50:50)_400bp_POL	50	U	0	0
WT+AtoC(50:50)_400bp_POL	51	U	0	0
WT+AtoT(50:50)_400bp_POL	52	U	0	0
WT+del1bp(50:50)_400bp_POL	53	U	0	0
WT+ins3bp(50:50)_400bp_POL	54	U	0	0
WT+ins9bp(50:50)_400bp_POL	55	U	0	0
NTC	56	U	0	0
WT_400bp_POL	57	U	0	0
WT+AtoG(50:50)_400bp_POL	58	U	0	0
WT+AtoC(50:50)_400bp_POL	59	U	0	0
WT+AtoT(50:50)_400bp_POL	60	U	0	0
WT+del1bp(50:50)_400bp_POL	61	U	0	0
WT+ins3bp(50:50)_400bp_POL	62	U	0	0
WT+ins9bp(50:50)_400bp_POL	63	U	0	0
NTC	64	U	0	0
WT_600bp_POL	65	U	0	0
WT+AtoG(50:50)_600bp_POL	66	U	0	0
WT+AtoC(50:50)_600bp_POL	67	U	0	0
WT+AtoT(50:50)_600bp_POL	68	U	0	0
WT+del1bp(50:50)_600bp_POL	69	U	0	0
WT+ins3bp(50:50)_600bp_POL	70	U	0	0
WT+ins9bp(50:50)_600bp_POL	71	U	0	0
NTC	72	U	0	0
WT_600bp_POL	73	U	0	0
WT+AtoG(50:50)_600bp_POL	74	U	0	0
WT+AtoC(50:50)_600bp_POL	75	U	0	0
WT+AtoT(50:50)_600bp_POL	76	U	0	0
WT+del1bp(50:50)_600bp_POL	77	U	0	0
WT+ins3bp(50:50)_600bp_POL	78	U	0	0
WT+ins9bp(50:50)_600bp_POL	79	U	0	0
NTC	80	U	0	0
WT_800bp_POL	81	U	0	0
WT+AtoG(50:50)_800bp_POL	82	U	0	0
WT+AtoC(50:50)_800bp_POL	83	U	0	0
WT+AtoT(50:50)_800bp_POL	84	U	0	0
WT+del1bp(50:50)_800bp_POL	85	U	0	0
WT+ins3bp(50:50)_800bp_POL	86	U	0	0
WT+ins9bp(50:50)_800bp_POL	87	U	0	0
NTC	88	U	0	0
WT_800bp_POL	89	U	0	0
WT+AtoG(50:50)_800bp_POL	90	U	0	0
WT+AtoC(50:50)_800bp_POL	91	U	0	0
WT+AtoT(50:50)_800bp_POL	92	U	0	0
WT+del1bp(50:50)_800bp_POL	93	U	0	0
WT+ins3bp(50:50)_800bp_POL	94	U	0	0
WT+ins9bp(50:50)_800bp_POL	95	U	0	0
NTC	96	U	0	0
^Programs:
Start	0
Melting data	2
^Programs2:
[0, 0, 0]
 1.000000	 0.000000	 0.000000	 1.000000	 0.000000	 0.000000	 0.000000
45.000000	60.000000	 0.000000	 0.000000	 0.000000	 0.000000	 0.000000

[1, 0, 0]
 1.000000	 3.000000	 2.000000	 2.000000	 0.000000	 0.000000	 0.000000
45.000000	60.000000	20.000000	 0.000000	 0.000000	 0.000000	 0.000000
80.000000	 0.000000	 0.100000	 0.000000	 0.000000	 0.000000	 2.000000

^Defaults:
