# Supplementary material for: Analysis of HIV Using a High Resolution Melting (HRM) Diversity Assay: Automation of HRM Data Analysis Enhances the Utility of the Assay for Analysis of HIV Incidence
Source: PLoS One. 2012 Dec 11;7(12):e51359. doi: 10.1371/journal.pone.0051359 (PMC3519891; doi:10.1371/journal.pone.0051359)
Supplement: Archive S1 — Test dataset for analysis with the HRM Diversity Assay Analysis Tool (DivMelt). Artificial diverse DNA populations were created by mixing mutagenized and wildtype HIV-derived plasmids. The diverse DNA populations were amplified and analyzed with the HRM diversity assay. These data files were exported from the LightScanner Instrument and Analysis Software (BioFire Diagnostics, Salt Lake City, UT) package and serve as input data for DivMelt. (ZIP) [file pone.0051359.s001.zip › Archive_S1/DivMelt_test_data.FLO]

Sample#	Program#	Segment#	Cycle#	Time	Temperature	Flo1	Flo2	Flo3	Flo4	Flo5	Flo6	Gain1	Gain2	Gain3	Gain4	Gain5	Gain6
1	1	2	1	0	58.254	746.54	0	0	0	0	0	1	1	1	1	1	1
2	1	2	1	50	58.254	734.922	0	0	0	0	0	1	1	1	1	1	1
3	1	2	1	100	58.254	774.153	0	0	0	0	0	1	1	1	1	1	1
4	1	2	1	150	58.254	757.377	0	0	0	0	0	1	1	1	1	1	1
5	1	2	1	200	58.254	740.196	0	0	0	0	0	1	1	1	1	1	1
6	1	2	1	250	58.254	749.359	0	0	0	0	0	1	1	1	1	1	1
7	1	2	1	300	58.254	765.877	0	0	0	0	0	1	1	1	1	1	1
8	1	2	1	350	58.254	157.094	0	0	0	0	0	1	1	1	1	1	1
9	1	2	1	400	58.254	661.771	0	0	0	0	0	1	1	1	1	1	1
10	1	2	1	450	58.254	618.398	0	0	0	0	0	1	1	1	1	1	1
11	1	2	1	500	58.254	619.432	0	0	0	0	0	1	1	1	1	1	1
12	1	2	1	550	58.254	618.742	0	0	0	0	0	1	1	1	1	1	1
13	1	2	1	600	58.254	670.264	0	0	0	0	0	1	1	1	1	1	1
14	1	2	1	650	58.254	661.028	0	0	0	0	0	1	1	1	1	1	1
15	1	2	1	700	58.254	655.425	0	0	0	0	0	1	1	1	1	1	1
16	1	2	1	750	58.254	143.067	0	0	0	0	0	1	1	1	1	1	1
17	1	2	1	800	58.254	856.782	0	0	0	0	0	1	1	1	1	1	1
18	1	2	1	850	58.254	826.663	0	0	0	0	0	1	1	1	1	1	1
19	1	2	1	900	58.254	860.909	0	0	0	0	0	1	1	1	1	1	1
20	1	2	1	950	58.254	816.681	0	0	0	0	0	1	1	1	1	1	1
21	1	2	1	1000	58.254	874.558	0	0	0	0	0	1	1	1	1	1	1
22	1	2	1	1050	58.254	873.833	0	0	0	0	0	1	1	1	1	1	1
23	1	2	1	1100	58.254	827.106	0	0	0	0	0	1	1	1	1	1	1
24	1	2	1	1150	58.254	158.636	0	0	0	0	0	1	1	1	1	1	1
25	1	2	1	1200	58.254	875.066	0	0	0	0	0	1	1	1	1	1	1
26	1	2	1	1250	58.254	814.259	0	0	0	0	0	1	1	1	1	1	1
27	1	2	1	1300	58.254	845.683	0	0	0	0	0	1	1	1	1	1	1
28	1	2	1	1350	58.254	844.21	0	0	0	0	0	1	1	1	1	1	1
29	1	2	1	1400	58.254	865.573	0	0	0	0	0	1	1	1	1	1	1
30	1	2	1	1450	58.254	831.761	0	0	0	0	0	1	1	1	1	1	1
31	1	2	1	1500	58.254	842.905	0	0	0	0	0	1	1	1	1	1	1
32	1	2	1	1550	58.254	151.608	0	0	0	0	0	1	1	1	1	1	1
33	1	2	1	1600	58.254	1139.827	0	0	0	0	0	1	1	1	1	1	1
34	1	2	1	1650	58.254	1085.139	0	0	0	0	0	1	1	1	1	1	1
35	1	2	1	1700	58.254	1186.356	0	0	0	0	0	1	1	1	1	1	1
36	1	2	1	1750	58.254	1124.78	0	0	0	0	0	1	1	1	1	1	1
37	1	2	1	1800	58.254	1158.101	0	0	0	0	0	1	1	1	1	1	1
38	1	2	1	1850	58.254	1177.407	0	0	0	0	0	1	1	1	1	1	1
39	1	2	1	1900	58.254	1114.292	0	0	0	0	0	1	1	1	1	1	1
40	1	2	1	1950	58.254	160.27	0	0	0	0	0	1	1	1	1	1	1
41	1	2	1	2000	58.254	1105.033	0	0	0	0	0	1	1	1	1	1	1
42	1	2	1	2050	58.254	1114.524	0	0	0	0	0	1	1	1	1	1	1
43	1	2	1	2100	58.254	1160.664	0	0	0	0	0	1	1	1	1	1	1
44	1	2	1	2150	58.254	1226.872	0	0	0	0	0	1	1	1	1	1	1
45	1	2	1	2200	58.254	1194.902	0	0	0	0	0	1	1	1	1	1	1
46	1	2	1	2250	58.254	1156.917	0	0	0	0	0	1	1	1	1	1	1
47	1	2	1	2300	58.254	1152.269	0	0	0	0	0	1	1	1	1	1	1
48	1	2	1	2350	58.254	156.05	0	0	0	0	0	1	1	1	1	1	1
49	1	2	1	2400	58.254	1195.989	0	0	0	0	0	1	1	1	1	1	1
50	1	2	1	2450	58.254	1232.506	0	0	0	0	0	1	1	1	1	1	1
51	1	2	1	2500	58.254	1401.293	0	0	0	0	0	1	1	1	1	1	1
52	1	2	1	2550	58.254	1338.223	0	0	0	0	0	1	1	1	1	1	1
53	1	2	1	2600	58.254	1406.656	0	0	0	0	0	1	1	1	1	1	1
54	1	2	1	2650	58.254	1331.466	0	0	0	0	0	1	1	1	1	1	1
55	1	2	1	2700	58.254	1212.248	0	0	0	0	0	1	1	1	1	1	1
56	1	2	1	2750	58.254	136.13	0	0	0	0	0	1	1	1	1	1	1
57	1	2	1	2800	58.254	1220.437	0	0	0	0	0	1	1	1	1	1	1
58	1	2	1	2850	58.254	1200.5	0	0	0	0	0	1	1	1	1	1	1
59	1	2	1	2900	58.254	1248.442	0	0	0	0	0	1	1	1	1	1	1
60	1	2	1	2950	58.254	1261.277	0	0	0	0	0	1	1	1	1	1	1
61	1	2	1	3000	58.254	1264.223	0	0	0	0	0	1	1	1	1	1	1
62	1	2	1	3050	58.254	1245.184	0	0	0	0	0	1	1	1	1	1	1
63	1	2	1	3100	58.254	1152.534	0	0	0	0	0	1	1	1	1	1	1
64	1	2	1	3150	58.254	145.281	0	0	0	0	0	1	1	1	1	1	1
65	1	2	1	3200	58.254	1366.609	0	0	0	0	0	1	1	1	1	1	1
66	1	2	1	3250	58.254	1328.129	0	0	0	0	0	1	1	1	1	1	1
67	1	2	1	3300	58.254	1409.114	0	0	0	0	0	1	1	1	1	1	1
68	1	2	1	3350	58.254	1353.221	0	0	0	0	0	1	1	1	1	1	1
69	1	2	1	3400	58.254	1430.773	0	0	0	0	0	1	1	1	1	1	1
70	1	2	1	3450	58.254	1306.361	0	0	0	0	0	1	1	1	1	1	1
71	1	2	1	3500	58.254	1292.233	0	0	0	0	0	1	1	1	1	1	1
72	1	2	1	3550	58.254	166.427	0	0	0	0	0	1	1	1	1	1	1
73	1	2	1	3600	58.254	1362.547	0	0	0	0	0	1	1	1	1	1	1
74	1	2	1	3650	58.254	1273.165	0	0	0	0	0	1	1	1	1	1	1
75	1	2	1	3700	58.254	1271.829	0	0	0	0	0	1	1	1	1	1	1
76	1	2	1	3750	58.254	1218.255	0	0	0	0	0	1	1	1	1	1	1
77	1	2	1	3800	58.254	1201.672	0	0	0	0	0	1	1	1	1	1	1
78	1	2	1	3850	58.254	1166.523	0	0	0	0	0	1	1	1	1	1	1
79	1	2	1	3900	58.254	1192.722	0	0	0	0	0	1	1	1	1	1	1
80	1	2	1	3950	58.254	152.15	0	0	0	0	0	1	1	1	1	1	1
81	1	2	1	4000	58.254	1588.626	0	0	0	0	0	1	1	1	1	1	1
82	1	2	1	4050	58.254	1420.922	0	0	0	0	0	1	1	1	1	1	1
83	1	2	1	4100	58.254	1431.728	0	0	0	0	0	1	1	1	1	1	1
84	1	2	1	4150	58.254	1376.59	0	0	0	0	0	1	1	1	1	1	1
85	1	2	1	4200	58.254	1413.632	0	0	0	0	0	1	1	1	1	1	1
86	1	2	1	4250	58.254	1376.57	0	0	0	0	0	1	1	1	1	1	1
87	1	2	1	4300	58.254	1316.934	0	0	0	0	0	1	1	1	1	1	1
88	1	2	1	4350	58.254	147.793	0	0	0	0	0	1	1	1	1	1	1
89	1	2	1	4400	58.254	1534.662	0	0	0	0	0	1	1	1	1	1	1
90	1	2	1	4450	58.254	1495.274	0	0	0	0	0	1	1	1	1	1	1
91	1	2	1	4500	58.254	1491.175	0	0	0	0	0	1	1	1	1	1	1
92	1	2	1	4550	58.254	1436.339	0	0	0	0	0	1	1	1	1	1	1
93	1	2	1	4600	58.254	1436.207	0	0	0	0	0	1	1	1	1	1	1
94	1	2	1	4650	58.254	1382.703	0	0	0	0	0	1	1	1	1	1	1
95	1	2	1	4700	58.254	1406.599	0	0	0	0	0	1	1	1	1	1	1
96	1	2	1	4750	58.254	139.206	0	0	0	0	0	1	1	1	1	1	1
1	1	2	1	4800	58.339	744.991	0	0	0	0	0	1	1	1	1	1	1
2	1	2	1	4850	58.339	733.501	0	0	0	0	0	1	1	1	1	1	1
3	1	2	1	4900	58.339	772.894	0	0	0	0	0	1	1	1	1	1	1
4	1	2	1	4950	58.339	756.042	0	0	0	0	0	1	1	1	1	1	1
5	1	2	1	5000	58.339	738.718	0	0	0	0	0	1	1	1	1	1	1
6	1	2	1	5050	58.339	747.947	0	0	0	0	0	1	1	1	1	1	1
7	1	2	1	5100	58.339	764.427	0	0	0	0	0	1	1	1	1	1	1
8	1	2	1	5150	58.339	156.721	0	0	0	0	0	1	1	1	1	1	1
9	1	2	1	5200	58.339	660.495	0	0	0	0	0	1	1	1	1	1	1
10	1	2	1	5250	58.339	617.378	0	0	0	0	0	1	1	1	1	1	1
11	1	2	1	5300	58.339	618.532	0	0	0	0	0	1	1	1	1	1	1
12	1	2	1	5350	58.339	617.323	0	0	0	0	0	1	1	1	1	1	1
13	1	2	1	5400	58.339	668.854	0	0	0	0	0	1	1	1	1	1	1
14	1	2	1	5450	58.339	659.681	0	0	0	0	0	1	1	1	1	1	1
15	1	2	1	5500	58.339	654.339	0	0	0	0	0	1	1	1	1	1	1
16	1	2	1	5550	58.339	142.813	0	0	0	0	0	1	1	1	1	1	1
17	1	2	1	5600	58.339	855.355	0	0	0	0	0	1	1	1	1	1	1
18	1	2	1	5650	58.339	825.101	0	0	0	0	0	1	1	1	1	1	1
19	1	2	1	5700	58.339	859.773	0	0	0	0	0	1	1	1	1	1	1
20	1	2	1	5750	58.339	815.288	0	0	0	0	0	1	1	1	1	1	1
21	1	2	1	5800	58.339	873.123	0	0	0	0	0	1	1	1	1	1	1
22	1	2	1	5850	58.339	872.278	0	0	0	0	0	1	1	1	1	1	1
23	1	2	1	5900	58.339	825.62	0	0	0	0	0	1	1	1	1	1	1
24	1	2	1	5950	58.339	158.135	0	0	0	0	0	1	1	1	1	1	1
25	1	2	1	6000	58.339	873.57	0	0	0	0	0	1	1	1	1	1	1
26	1	2	1	6050	58.339	812.951	0	0	0	0	0	1	1	1	1	1	1
27	1	2	1	6100	58.339	844.15	0	0	0	0	0	1	1	1	1	1	1
28	1	2	1	6150	58.339	842.691	0	0	0	0	0	1	1	1	1	1	1
29	1	2	1	6200	58.339	864.128	0	0	0	0	0	1	1	1	1	1	1
30	1	2	1	6250	58.339	830.438	0	0	0	0	0	1	1	1	1	1	1
31	1	2	1	6300	58.339	841.575	0	0	0	0	0	1	1	1	1	1	1
32	1	2	1	6350	58.339	151.208	0	0	0	0	0	1	1	1	1	1	1
33	1	2	1	6400	58.339	1138.172	0	0	0	0	0	1	1	1	1	1	1
34	1	2	1	6450	58.339	1083.473	0	0	0	0	0	1	1	1	1	1	1
35	1	2	1	6500	58.339	1184.55	0	0	0	0	0	1	1	1	1	1	1
36	1	2	1	6550	58.339	1123.139	0	0	0	0	0	1	1	1	1	1	1
37	1	2	1	6600	58.339	1156.192	0	0	0	0	0	1	1	1	1	1	1
38	1	2	1	6650	58.339	1175.711	0	0	0	0	0	1	1	1	1	1	1
39	1	2	1	6700	58.339	1112.781	0	0	0	0	0	1	1	1	1	1	1
40	1	2	1	6750	58.339	159.844	0	0	0	0	0	1	1	1	1	1	1
41	1	2	1	6800	58.339	1103.302	0	0	0	0	0	1	1	1	1	1	1
42	1	2	1	6850	58.339	1113.075	0	0	0	0	0	1	1	1	1	1	1
43	1	2	1	6900	58.339	1159.003	0	0	0	0	0	1	1	1	1	1	1
44	1	2	1	6950	58.339	1225.164	0	0	0	0	0	1	1	1	1	1	1
45	1	2	1	7000	58.339	1193.332	0	0	0	0	0	1	1	1	1	1	1
46	1	2	1	7050	58.339	1155.129	0	0	0	0	0	1	1	1	1	1	1
47	1	2	1	7100	58.339	1150.798	0	0	0	0	0	1	1	1	1	1	1
48	1	2	1	7150	58.339	155.85	0	0	0	0	0	1	1	1	1	1	1
49	1	2	1	7200	58.339	1194.212	0	0	0	0	0	1	1	1	1	1	1
50	1	2	1	7250	58.339	1230.662	0	0	0	0	0	1	1	1	1	1	1
51	1	2	1	7300	58.339	1399.208	0	0	0	0	0	1	1	1	1	1	1
52	1	2	1	7350	58.339	1335.822	0	0	0	0	0	1	1	1	1	1	1
53	1	2	1	7400	58.339	1404.7	0	0	0	0	0	1	1	1	1	1	1
54	1	2	1	7450	58.339	1329.755	0	0	0	0	0	1	1	1	1	1	1
55	1	2	1	7500	58.339	1210.499	0	0	0	0	0	1	1	1	1	1	1
56	1	2	1	7550	58.339	135.9	0	0	0	0	0	1	1	1	1	1	1
57	1	2	1	7600	58.339	1218.822	0	0	0	0	0	1	1	1	1	1	1
58	1	2	1	7650	58.339	1199.021	0	0	0	0	0	1	1	1	1	1	1
59	1	2	1	7700	58.339	1246.642	0	0	0	0	0	1	1	1	1	1	1
60	1	2	1	7750	58.339	1259.023	0	0	0	0	0	1	1	1	1	1	1
61	1	2	1	7800	58.339	1262.265	0	0	0	0	0	1	1	1	1	1	1
62	1	2	1	7850	58.339	1243.505	0	0	0	0	0	1	1	1	1	1	1
63	1	2	1	7900	58.339	1150.532	0	0	0	0	0	1	1	1	1	1	1
64	1	2	1	7950	58.339	144.856	0	0	0	0	0	1	1	1	1	1	1
65	1	2	1	8000	58.339	1364.883	0	0	0	0	0	1	1	1	1	1	1
66	1	2	1	8050	58.339	1326.354	0	0	0	0	0	1	1	1	1	1	1
67	1	2	1	8100	58.339	1407.16	0	0	0	0	0	1	1	1	1	1	1
68	1	2	1	8150	58.339	1351.375	0	0	0	0	0	1	1	1	1	1	1
69	1	2	1	8200	58.339	1428.942	0	0	0	0	0	1	1	1	1	1	1
70	1	2	1	8250	58.339	1304.538	0	0	0	0	0	1	1	1	1	1	1
71	1	2	1	8300	58.339	1290.685	0	0	0	0	0	1	1	1	1	1	1
72	1	2	1	8350	58.339	165.758	0	0	0	0	0	1	1	1	1	1	1
73	1	2	1	8400	58.339	1360.708	0	0	0	0	0	1	1	1	1	1	1
74	1	2	1	8450	58.339	1271.778	0	0	0	0	0	1	1	1	1	1	1
75	1	2	1	8500	58.339	1270.295	0	0	0	0	0	1	1	1	1	1	1
76	1	2	1	8550	58.339	1216.685	0	0	0	0	0	1	1	1	1	1	1
77	1	2	1	8600	58.339	1199.964	0	0	0	0	0	1	1	1	1	1	1
78	1	2	1	8650	58.339	1164.492	0	0	0	0	0	1	1	1	1	1	1
79	1	2	1	8700	58.339	1191.445	0	0	0	0	0	1	1	1	1	1	1
80	1	2	1	8750	58.339	151.654	0	0	0	0	0	1	1	1	1	1	1
81	1	2	1	8800	58.339	1586.613	0	0	0	0	0	1	1	1	1	1	1
82	1	2	1	8850	58.339	1419.221	0	0	0	0	0	1	1	1	1	1	1
83	1	2	1	8900	58.339	1430.174	0	0	0	0	0	1	1	1	1	1	1
84	1	2	1	8950	58.339	1375.402	0	0	0	0	0	1	1	1	1	1	1
85	1	2	1	9000	58.339	1412.12	0	0	0	0	0	1	1	1	1	1	1
86	1	2	1	9050	58.339	1374.897	0	0	0	0	0	1	1	1	1	1	1
87	1	2	1	9100	58.339	1316.156	0	0	0	0	0	1	1	1	1	1	1
88	1	2	1	9150	58.339	147.441	0	0	0	0	0	1	1	1	1	1	1
89	1	2	1	9200	58.339	1532.917	0	0	0	0	0	1	1	1	1	1	1
90	1	2	1	9250	58.339	1493.446	0	0	0	0	0	1	1	1	1	1	1
91	1	2	1	9300	58.339	1489.897	0	0	0	0	0	1	1	1	1	1	1
92	1	2	1	9350	58.339	1434.361	0	0	0	0	0	1	1	1	1	1	1
93	1	2	1	9400	58.339	1434.328	0	0	0	0	0	1	1	1	1	1	1
94	1	2	1	9450	58.339	1380.906	0	0	0	0	0	1	1	1	1	1	1
95	1	2	1	9500	58.339	1404.516	0	0	0	0	0	1	1	1	1	1	1
96	1	2	1	9550	58.339	138.763	0	0	0	0	0	1	1	1	1	1	1
1	1	2	1	9600	58.419	743.616	0	0	0	0	0	1	1	1	1	1	1
2	1	2	1	9650	58.419	732.515	0	0	0	0	0	1	1	1	1	1	1
3	1	2	1	9700	58.419	771.168	0	0	0	0	0	1	1	1	1	1	1
4	1	2	1	9750	58.419	754.692	0	0	0	0	0	1	1	1	1	1	1
5	1	2	1	9800	58.419	737.356	0	0	0	0	0	1	1	1	1	1	1
6	1	2	1	9850	58.419	746.488	0	0	0	0	0	1	1	1	1	1	1
7	1	2	1	9900	58.419	763.085	0	0	0	0	0	1	1	1	1	1	1
8	1	2	1	9950	58.419	156.387	0	0	0	0	0	1	1	1	1	1	1
9	1	2	1	10000	58.419	659.337	0	0	0	0	0	1	1	1	1	1	1
10	1	2	1	10050	58.419	616.309	0	0	0	0	0	1	1	1	1	1	1
11	1	2	1	10100	58.419	617.312	0	0	0	0	0	1	1	1	1	1	1
12	1	2	1	10150	58.419	616.699	0	0	0	0	0	1	1	1	1	1	1
13	1	2	1	10200	58.419	667.614	0	0	0	0	0	1	1	1	1	1	1
14	1	2	1	10250	58.419	658.681	0	0	0	0	0	1	1	1	1	1	1
15	1	2	1	10300	58.419	652.991	0	0	0	0	0	1	1	1	1	1	1
16	1	2	1	10350	58.419	142.383	0	0	0	0	0	1	1	1	1	1	1
17	1	2	1	10400	58.419	853.709	0	0	0	0	0	1	1	1	1	1	1
18	1	2	1	10450	58.419	823.618	0	0	0	0	0	1	1	1	1	1	1
19	1	2	1	10500	58.419	858.182	0	0	0	0	0	1	1	1	1	1	1
20	1	2	1	10550	58.419	813.76	0	0	0	0	0	1	1	1	1	1	1
21	1	2	1	10600	58.419	871.918	0	0	0	0	0	1	1	1	1	1	1
22	1	2	1	10650	58.419	870.671	0	0	0	0	0	1	1	1	1	1	1
23	1	2	1	10700	58.419	824.249	0	0	0	0	0	1	1	1	1	1	1
24	1	2	1	10750	58.419	157.618	0	0	0	0	0	1	1	1	1	1	1
25	1	2	1	10800	58.419	872.274	0	0	0	0	0	1	1	1	1	1	1
26	1	2	1	10850	58.419	811.611	0	0	0	0	0	1	1	1	1	1	1
27	1	2	1	10900	58.419	843.042	0	0	0	0	0	1	1	1	1	1	1
28	1	2	1	10950	58.419	841.248	0	0	0	0	0	1	1	1	1	1	1
29	1	2	1	11000	58.419	862.777	0	0	0	0	0	1	1	1	1	1	1
30	1	2	1	11050	58.419	829.116	0	0	0	0	0	1	1	1	1	1	1
31	1	2	1	11100	58.419	840.208	0	0	0	0	0	1	1	1	1	1	1
32	1	2	1	11150	58.419	150.715	0	0	0	0	0	1	1	1	1	1	1
33	1	2	1	11200	58.419	1136.403	0	0	0	0	0	1	1	1	1	1	1
34	1	2	1	11250	58.419	1082.601	0	0	0	0	0	1	1	1	1	1	1
35	1	2	1	11300	58.419	1182.646	0	0	0	0	0	1	1	1	1	1	1
36	1	2	1	11350	58.419	1121.341	0	0	0	0	0	1	1	1	1	1	1
37	1	2	1	11400	58.419	1154.413	0	0	0	0	0	1	1	1	1	1	1
38	1	2	1	11450	58.419	1173.737	0	0	0	0	0	1	1	1	1	1	1
39	1	2	1	11500	58.419	1111.403	0	0	0	0	0	1	1	1	1	1	1
40	1	2	1	11550	58.419	159.517	0	0	0	0	0	1	1	1	1	1	1
41	1	2	1	11600	58.419	1101.634	0	0	0	0	0	1	1	1	1	1	1
42	1	2	1	11650	58.419	1111.627	0	0	0	0	0	1	1	1	1	1	1
43	1	2	1	11700	58.419	1157.278	0	0	0	0	0	1	1	1	1	1	1
44	1	2	1	11750	58.419	1222.827	0	0	0	0	0	1	1	1	1	1	1
45	1	2	1	11800	58.419	1191.607	0	0	0	0	0	1	1	1	1	1	1
46	1	2	1	11850	58.419	1153.924	0	0	0	0	0	1	1	1	1	1	1
47	1	2	1	11900	58.419	1149.183	0	0	0	0	0	1	1	1	1	1	1
48	1	2	1	11950	58.419	155.43	0	0	0	0	0	1	1	1	1	1	1
49	1	2	1	12000	58.419	1192.262	0	0	0	0	0	1	1	1	1	1	1
50	1	2	1	12050	58.419	1229.308	0	0	0	0	0	1	1	1	1	1	1
51	1	2	1	12100	58.419	1397.319	0	0	0	0	0	1	1	1	1	1	1
52	1	2	1	12150	58.419	1333.977	0	0	0	0	0	1	1	1	1	1	1
53	1	2	1	12200	58.419	1402.465	0	0	0	0	0	1	1	1	1	1	1
54	1	2	1	12250	58.419	1327.72	0	0	0	0	0	1	1	1	1	1	1
55	1	2	1	12300	58.419	1209.058	0	0	0	0	0	1	1	1	1	1	1
56	1	2	1	12350	58.419	135.693	0	0	0	0	0	1	1	1	1	1	1
57	1	2	1	12400	58.419	1217.08	0	0	0	0	0	1	1	1	1	1	1
58	1	2	1	12450	58.419	1197.312	0	0	0	0	0	1	1	1	1	1	1
59	1	2	1	12500	58.419	1245.31	0	0	0	0	0	1	1	1	1	1	1
60	1	2	1	12550	58.419	1257.479	0	0	0	0	0	1	1	1	1	1	1
61	1	2	1	12600	58.419	1260.621	0	0	0	0	0	1	1	1	1	1	1
62	1	2	1	12650	58.419	1241.813	0	0	0	0	0	1	1	1	1	1	1
63	1	2	1	12700	58.419	1149.16	0	0	0	0	0	1	1	1	1	1	1
64	1	2	1	12750	58.419	144.52	0	0	0	0	0	1	1	1	1	1	1
65	1	2	1	12800	58.419	1363.095	0	0	0	0	0	1	1	1	1	1	1
66	1	2	1	12850	58.419	1324.835	0	0	0	0	0	1	1	1	1	1	1
67	1	2	1	12900	58.419	1405.733	0	0	0	0	0	1	1	1	1	1	1
68	1	2	1	12950	58.419	1349.923	0	0	0	0	0	1	1	1	1	1	1
69	1	2	1	13000	58.419	1426.926	0	0	0	0	0	1	1	1	1	1	1
70	1	2	1	13050	58.419	1302.804	0	0	0	0	0	1	1	1	1	1	1
71	1	2	1	13100	58.419	1288.811	0	0	0	0	0	1	1	1	1	1	1
72	1	2	1	13150	58.419	165.293	0	0	0	0	0	1	1	1	1	1	1
73	1	2	1	13200	58.419	1358.885	0	0	0	0	0	1	1	1	1	1	1
74	1	2	1	13250	58.419	1270.3	0	0	0	0	0	1	1	1	1	1	1
75	1	2	1	13300	58.419	1268.444	0	0	0	0	0	1	1	1	1	1	1
76	1	2	1	13350	58.419	1214.835	0	0	0	0	0	1	1	1	1	1	1
77	1	2	1	13400	58.419	1198.332	0	0	0	0	0	1	1	1	1	1	1
78	1	2	1	13450	58.419	1163.184	0	0	0	0	0	1	1	1	1	1	1
79	1	2	1	13500	58.419	1189.736	0	0	0	0	0	1	1	1	1	1	1
80	1	2	1	13550	58.419	151.164	0	0	0	0	0	1	1	1	1	1	1
81	1	2	1	13600	58.419	1584.861	0	0	0	0	0	1	1	1	1	1	1
82	1	2	1	13650	58.419	1418.117	0	0	0	0	0	1	1	1	1	1	1
83	1	2	1	13700	58.419	1428.485	0	0	0	0	0	1	1	1	1	1	1
84	1	2	1	13750	58.419	1374.157	0	0	0	0	0	1	1	1	1	1	1
85	1	2	1	13800	58.419	1410.473	0	0	0	0	0	1	1	1	1	1	1
86	1	2	1	13850	58.419	1373.441	0	0	0	0	0	1	1	1	1	1	1
87	1	2	1	13900	58.419	1314.653	0	0	0	0	0	1	1	1	1	1	1
88	1	2	1	13950	58.419	146.898	0	0	0	0	0	1	1	1	1	1	1
89	1	2	1	14000	58.419	1531.065	0	0	0	0	0	1	1	1	1	1	1
90	1	2	1	14050	58.419	1491.852	0	0	0	0	0	1	1	1	1	1	1
91	1	2	1	14100	58.419	1487.85	0	0	0	0	0	1	1	1	1	1	1
92	1	2	1	14150	58.419	1432.782	0	0	0	0	0	1	1	1	1	1	1
93	1	2	1	14200	58.419	1432.389	0	0	0	0	0	1	1	1	1	1	1
94	1	2	1	14250	58.419	1379.366	0	0	0	0	0	1	1	1	1	1	1
95	1	2	1	14300	58.419	1403.173	0	0	0	0	0	1	1	1	1	1	1
96	1	2	1	14350	58.419	138.463	0	0	0	0	0	1	1	1	1	1	1
1	1	2	1	14400	58.508	742.227	0	0	0	0	0	1	1	1	1	1	1
2	1	2	1	14450	58.508	730.988	0	0	0	0	0	1	1	1	1	1	1
3	1	2	1	14500	58.508	769.997	0	0	0	0	0	1	1	1	1	1	1
4	1	2	1	14550	58.508	753.434	0	0	0	0	0	1	1	1	1	1	1
5	1	2	1	14600	58.508	736.18	0	0	0	0	0	1	1	1	1	1	1
6	1	2	1	14650	58.508	745.205	0	0	0	0	0	1	1	1	1	1	1
7	1	2	1	14700	58.508	761.829	0	0	0	0	0	1	1	1	1	1	1
8	1	2	1	14750	58.508	156	0	0	0	0	0	1	1	1	1	1	1
9	1	2	1	14800	58.508	657.825	0	0	0	0	0	1	1	1	1	1	1
10	1	2	1	14850	58.508	615.155	0	0	0	0	0	1	1	1	1	1	1
11	1	2	1	14900	58.508	616.033	0	0	0	0	0	1	1	1	1	1	1
12	1	2	1	14950	58.508	615.289	0	0	0	0	0	1	1	1	1	1	1
13	1	2	1	15000	58.508	666.456	0	0	0	0	0	1	1	1	1	1	1
14	1	2	1	15050	58.508	657.518	0	0	0	0	0	1	1	1	1	1	1
15	1	2	1	15100	58.508	651.921	0	0	0	0	0	1	1	1	1	1	1
16	1	2	1	15150	58.508	142.052	0	0	0	0	0	1	1	1	1	1	1
17	1	2	1	15200	58.508	852.052	0	0	0	0	0	1	1	1	1	1	1
18	1	2	1	15250	58.508	822.168	0	0	0	0	0	1	1	1	1	1	1
19	1	2	1	15300	58.508	856.694	0	0	0	0	0	1	1	1	1	1	1
20	1	2	1	15350	58.508	812.749	0	0	0	0	0	1	1	1	1	1	1
21	1	2	1	15400	58.508	870.467	0	0	0	0	0	1	1	1	1	1	1
22	1	2	1	15450	58.508	869.512	0	0	0	0	0	1	1	1	1	1	1
23	1	2	1	15500	58.508	822.967	0	0	0	0	0	1	1	1	1	1	1
24	1	2	1	15550	58.508	157.175	0	0	0	0	0	1	1	1	1	1	1
25	1	2	1	15600	58.508	870.539	0	0	0	0	0	1	1	1	1	1	1
26	1	2	1	15650	58.508	810.13	0	0	0	0	0	1	1	1	1	1	1
27	1	2	1	15700	58.508	841.546	0	0	0	0	0	1	1	1	1	1	1
28	1	2	1	15750	58.508	839.841	0	0	0	0	0	1	1	1	1	1	1
29	1	2	1	15800	58.508	861.38	0	0	0	0	0	1	1	1	1	1	1
30	1	2	1	15850	58.508	827.565	0	0	0	0	0	1	1	1	1	1	1
31	1	2	1	15900	58.508	839.067	0	0	0	0	0	1	1	1	1	1	1
32	1	2	1	15950	58.508	150.326	0	0	0	0	0	1	1	1	1	1	1
33	1	2	1	16000	58.508	1134.477	0	0	0	0	0	1	1	1	1	1	1
34	1	2	1	16050	58.508	1080.899	0	0	0	0	0	1	1	1	1	1	1
35	1	2	1	16100	58.508	1180.988	0	0	0	0	0	1	1	1	1	1	1
36	1	2	1	16150	58.508	1119.718	0	0	0	0	0	1	1	1	1	1	1
37	1	2	1	16200	58.508	1152.456	0	0	0	0	0	1	1	1	1	1	1
38	1	2	1	16250	58.508	1172.167	0	0	0	0	0	1	1	1	1	1	1
39	1	2	1	16300	58.508	1109.899	0	0	0	0	0	1	1	1	1	1	1
40	1	2	1	16350	58.508	159.067	0	0	0	0	0	1	1	1	1	1	1
41	1	2	1	16400	58.508	1100.16	0	0	0	0	0	1	1	1	1	1	1
42	1	2	1	16450	58.508	1109.992	0	0	0	0	0	1	1	1	1	1	1
43	1	2	1	16500	58.508	1155.224	0	0	0	0	0	1	1	1	1	1	1
44	1	2	1	16550	58.508	1220.959	0	0	0	0	0	1	1	1	1	1	1
45	1	2	1	16600	58.508	1189.575	0	0	0	0	0	1	1	1	1	1	1
46	1	2	1	16650	58.508	1151.663	0	0	0	0	0	1	1	1	1	1	1
47	1	2	1	16700	58.508	1147.525	0	0	0	0	0	1	1	1	1	1	1
48	1	2	1	16750	58.508	155.127	0	0	0	0	0	1	1	1	1	1	1
49	1	2	1	16800	58.508	1190.55	0	0	0	0	0	1	1	1	1	1	1
50	1	2	1	16850	58.508	1227.618	0	0	0	0	0	1	1	1	1	1	1
51	1	2	1	16900	58.508	1395.448	0	0	0	0	0	1	1	1	1	1	1
52	1	2	1	16950	58.508	1332.337	0	0	0	0	0	1	1	1	1	1	1
53	1	2	1	17000	58.508	1400.578	0	0	0	0	0	1	1	1	1	1	1
54	1	2	1	17050	58.508	1325.873	0	0	0	0	0	1	1	1	1	1	1
55	1	2	1	17100	58.508	1207.738	0	0	0	0	0	1	1	1	1	1	1
56	1	2	1	17150	58.508	135.35	0	0	0	0	0	1	1	1	1	1	1
57	1	2	1	17200	58.508	1215.171	0	0	0	0	0	1	1	1	1	1	1
58	1	2	1	17250	58.508	1195.938	0	0	0	0	0	1	1	1	1	1	1
59	1	2	1	17300	58.508	1243.296	0	0	0	0	0	1	1	1	1	1	1
60	1	2	1	17350	58.508	1255.34	0	0	0	0	0	1	1	1	1	1	1
61	1	2	1	17400	58.508	1258.54	0	0	0	0	0	1	1	1	1	1	1
62	1	2	1	17450	58.508	1240.351	0	0	0	0	0	1	1	1	1	1	1
63	1	2	1	17500	58.508	1147.3	0	0	0	0	0	1	1	1	1	1	1
64	1	2	1	17550	58.508	144.052	0	0	0	0	0	1	1	1	1	1	1
65	1	2	1	17600	58.508	1361.1	0	0	0	0	0	1	1	1	1	1	1
66	1	2	1	17650	58.508	1323.211	0	0	0	0	0	1	1	1	1	1	1
67	1	2	1	17700	58.508	1403.735	0	0	0	0	0	1	1	1	1	1	1
68	1	2	1	17750	58.508	1348.066	0	0	0	0	0	1	1	1	1	1	1
69	1	2	1	17800	58.508	1425.041	0	0	0	0	0	1	1	1	1	1	1
70	1	2	1	17850	58.508	1301.015	0	0	0	0	0	1	1	1	1	1	1
71	1	2	1	17900	58.508	1287.171	0	0	0	0	0	1	1	1	1	1	1
72	1	2	1	17950	58.508	164.89	0	0	0	0	0	1	1	1	1	1	1
73	1	2	1	18000	58.508	1357.018	0	0	0	0	0	1	1	1	1	1	1
74	1	2	1	18050	58.508	1268.529	0	0	0	0	0	1	1	1	1	1	1
75	1	2	1	18100	58.508	1267.077	0	0	0	0	0	1	1	1	1	1	1
76	1	2	1	18150	58.508	1212.898	0	0	0	0	0	1	1	1	1	1	1
77	1	2	1	18200	58.508	1196.564	0	0	0	0	0	1	1	1	1	1	1
78	1	2	1	18250	58.508	1161.503	0	0	0	0	0	1	1	1	1	1	1
79	1	2	1	18300	58.508	1188.623	0	0	0	0	0	1	1	1	1	1	1
80	1	2	1	18350	58.508	150.752	0	0	0	0	0	1	1	1	1	1	1
81	1	2	1	18400	58.508	1582.683	0	0	0	0	0	1	1	1	1	1	1
82	1	2	1	18450	58.508	1416.82	0	0	0	0	0	1	1	1	1	1	1
83	1	2	1	18500	58.508	1426.732	0	0	0	0	0	1	1	1	1	1	1
84	1	2	1	18550	58.508	1372.732	0	0	0	0	0	1	1	1	1	1	1
85	1	2	1	18600	58.508	1409.127	0	0	0	0	0	1	1	1	1	1	1
86	1	2	1	18650	58.508	1371.66	0	0	0	0	0	1	1	1	1	1	1
87	1	2	1	18700	58.508	1313.052	0	0	0	0	0	1	1	1	1	1	1
88	1	2	1	18750	58.508	146.497	0	0	0	0	0	1	1	1	1	1	1
89	1	2	1	18800	58.508	1529.035	0	0	0	0	0	1	1	1	1	1	1
90	1	2	1	18850	58.508	1489.822	0	0	0	0	0	1	1	1	1	1	1
91	1	2	1	18900	58.508	1486.009	0	0	0	0	0	1	1	1	1	1	1
92	1	2	1	18950	58.508	1430.589	0	0	0	0	0	1	1	1	1	1	1
93	1	2	1	19000	58.508	1430.76	0	0	0	0	0	1	1	1	1	1	1
94	1	2	1	19050	58.508	1377.453	0	0	0	0	0	1	1	1	1	1	1
95	1	2	1	19100	58.508	1401.302	0	0	0	0	0	1	1	1	1	1	1
96	1	2	1	19150	58.508	138.097	0	0	0	0	0	1	1	1	1	1	1
1	1	2	1	19200	58.602	740.631	0	0	0	0	0	1	1	1	1	1	1
2	1	2	1	19250	58.602	729.387	0	0	0	0	0	1	1	1	1	1	1
3	1	2	1	19300	58.602	768.335	0	0	0	0	0	1	1	1	1	1	1
4	1	2	1	19350	58.602	752.104	0	0	0	0	0	1	1	1	1	1	1
5	1	2	1	19400	58.602	734.671	0	0	0	0	0	1	1	1	1	1	1
6	1	2	1	19450	58.602	743.524	0	0	0	0	0	1	1	1	1	1	1
7	1	2	1	19500	58.602	760.157	0	0	0	0	0	1	1	1	1	1	1
8	1	2	1	19550	58.602	155.546	0	0	0	0	0	1	1	1	1	1	1
9	1	2	1	19600	58.602	656.444	0	0	0	0	0	1	1	1	1	1	1
10	1	2	1	19650	58.602	613.739	0	0	0	0	0	1	1	1	1	1	1
11	1	2	1	19700	58.602	614.821	0	0	0	0	0	1	1	1	1	1	1
12	1	2	1	19750	58.602	614.121	0	0	0	0	0	1	1	1	1	1	1
13	1	2	1	19800	58.602	664.94	0	0	0	0	0	1	1	1	1	1	1
14	1	2	1	19850	58.602	656.288	0	0	0	0	0	1	1	1	1	1	1
15	1	2	1	19900	58.602	650.712	0	0	0	0	0	1	1	1	1	1	1
16	1	2	1	19950	58.602	141.676	0	0	0	0	0	1	1	1	1	1	1
17	1	2	1	20000	58.602	850.239	0	0	0	0	0	1	1	1	1	1	1
18	1	2	1	20050	58.602	820.596	0	0	0	0	0	1	1	1	1	1	1
19	1	2	1	20100	58.602	855.179	0	0	0	0	0	1	1	1	1	1	1
20	1	2	1	20150	58.602	811.055	0	0	0	0	0	1	1	1	1	1	1
21	1	2	1	20200	58.602	868.567	0	0	0	0	0	1	1	1	1	1	1
22	1	2	1	20250	58.602	867.848	0	0	0	0	0	1	1	1	1	1	1
23	1	2	1	20300	58.602	821.358	0	0	0	0	0	1	1	1	1	1	1
24	1	2	1	20350	58.602	156.644	0	0	0	0	0	1	1	1	1	1	1
25	1	2	1	20400	58.602	868.735	0	0	0	0	0	1	1	1	1	1	1
26	1	2	1	20450	58.602	808.727	0	0	0	0	0	1	1	1	1	1	1
27	1	2	1	20500	58.602	839.86	0	0	0	0	0	1	1	1	1	1	1
28	1	2	1	20550	58.602	838.219	0	0	0	0	0	1	1	1	1	1	1
29	1	2	1	20600	58.602	859.676	0	0	0	0	0	1	1	1	1	1	1
30	1	2	1	20650	58.602	825.936	0	0	0	0	0	1	1	1	1	1	1
31	1	2	1	20700	58.602	837.423	0	0	0	0	0	1	1	1	1	1	1
32	1	2	1	20750	58.602	149.808	0	0	0	0	0	1	1	1	1	1	1
33	1	2	1	20800	58.602	1132.614	0	0	0	0	0	1	1	1	1	1	1
34	1	2	1	20850	58.602	1079.206	0	0	0	0	0	1	1	1	1	1	1
35	1	2	1	20900	58.602	1178.995	0	0	0	0	0	1	1	1	1	1	1
36	1	2	1	20950	58.602	1117.53	0	0	0	0	0	1	1	1	1	1	1
37	1	2	1	21000	58.602	1150.839	0	0	0	0	0	1	1	1	1	1	1
38	1	2	1	21050	58.602	1169.906	0	0	0	0	0	1	1	1	1	1	1
39	1	2	1	21100	58.602	1107.912	0	0	0	0	0	1	1	1	1	1	1
40	1	2	1	21150	58.602	158.616	0	0	0	0	0	1	1	1	1	1	1
41	1	2	1	21200	58.602	1098.219	0	0	0	0	0	1	1	1	1	1	1
42	1	2	1	21250	58.602	1108.132	0	0	0	0	0	1	1	1	1	1	1
43	1	2	1	21300	58.602	1153.146	0	0	0	0	0	1	1	1	1	1	1
44	1	2	1	21350	58.602	1218.734	0	0	0	0	0	1	1	1	1	1	1
45	1	2	1	21400	58.602	1187.379	0	0	0	0	0	1	1	1	1	1	1
46	1	2	1	21450	58.602	1149.683	0	0	0	0	0	1	1	1	1	1	1
47	1	2	1	21500	58.602	1145.506	0	0	0	0	0	1	1	1	1	1	1
48	1	2	1	21550	58.602	154.645	0	0	0	0	0	1	1	1	1	1	1
49	1	2	1	21600	58.602	1188.846	0	0	0	0	0	1	1	1	1	1	1
50	1	2	1	21650	58.602	1225.656	0	0	0	0	0	1	1	1	1	1	1
51	1	2	1	21700	58.602	1392.987	0	0	0	0	0	1	1	1	1	1	1
52	1	2	1	21750	58.602	1329.876	0	0	0	0	0	1	1	1	1	1	1
53	1	2	1	21800	58.602	1397.973	0	0	0	0	0	1	1	1	1	1	1
54	1	2	1	21850	58.602	1323.575	0	0	0	0	0	1	1	1	1	1	1
55	1	2	1	21900	58.602	1205.675	0	0	0	0	0	1	1	1	1	1	1
56	1	2	1	21950	58.602	134.934	0	0	0	0	0	1	1	1	1	1	1
57	1	2	1	22000	58.602	1213.074	0	0	0	0	0	1	1	1	1	1	1
58	1	2	1	22050	58.602	1194.056	0	0	0	0	0	1	1	1	1	1	1
59	1	2	1	22100	58.602	1241.236	0	0	0	0	0	1	1	1	1	1	1
60	1	2	1	22150	58.602	1253.011	0	0	0	0	0	1	1	1	1	1	1
61	1	2	1	22200	58.602	1256.743	0	0	0	0	0	1	1	1	1	1	1
62	1	2	1	22250	58.602	1238.431	0	0	0	0	0	1	1	1	1	1	1
63	1	2	1	22300	58.602	1145.39	0	0	0	0	0	1	1	1	1	1	1
64	1	2	1	22350	58.602	143.529	0	0	0	0	0	1	1	1	1	1	1
65	1	2	1	22400	58.602	1358.928	0	0	0	0	0	1	1	1	1	1	1
66	1	2	1	22450	58.602	1321.118	0	0	0	0	0	1	1	1	1	1	1
67	1	2	1	22500	58.602	1401.924	0	0	0	0	0	1	1	1	1	1	1
68	1	2	1	22550	58.602	1345.988	0	0	0	0	0	1	1	1	1	1	1
69	1	2	1	22600	58.602	1422.806	0	0	0	0	0	1	1	1	1	1	1
70	1	2	1	22650	58.602	1298.93	0	0	0	0	0	1	1	1	1	1	1
71	1	2	1	22700	58.602	1285.152	0	0	0	0	0	1	1	1	1	1	1
72	1	2	1	22750	58.602	164.081	0	0	0	0	0	1	1	1	1	1	1
73	1	2	1	22800	58.602	1354.923	0	0	0	0	0	1	1	1	1	1	1
74	1	2	1	22850	58.602	1266.905	0	0	0	0	0	1	1	1	1	1	1
75	1	2	1	22900	58.602	1265.279	0	0	0	0	0	1	1	1	1	1	1
76	1	2	1	22950	58.602	1211.125	0	0	0	0	0	1	1	1	1	1	1
77	1	2	1	23000	58.602	1194.711	0	0	0	0	0	1	1	1	1	1	1
78	1	2	1	23050	58.602	1159.641	0	0	0	0	0	1	1	1	1	1	1
79	1	2	1	23100	58.602	1186.795	0	0	0	0	0	1	1	1	1	1	1
80	1	2	1	23150	58.602	150.145	0	0	0	0	0	1	1	1	1	1	1
81	1	2	1	23200	58.602	1580.548	0	0	0	0	0	1	1	1	1	1	1
82	1	2	1	23250	58.602	1414.982	0	0	0	0	0	1	1	1	1	1	1
83	1	2	1	23300	58.602	1425.034	0	0	0	0	0	1	1	1	1	1	1
84	1	2	1	23350	58.602	1371.106	0	0	0	0	0	1	1	1	1	1	1
85	1	2	1	23400	58.602	1407.761	0	0	0	0	0	1	1	1	1	1	1
86	1	2	1	23450	58.602	1369.768	0	0	0	0	0	1	1	1	1	1	1
87	1	2	1	23500	58.602	1311.642	0	0	0	0	0	1	1	1	1	1	1
88	1	2	1	23550	58.602	146.068	0	0	0	0	0	1	1	1	1	1	1
89	1	2	1	23600	58.602	1526.84	0	0	0	0	0	1	1	1	1	1	1
90	1	2	1	23650	58.602	1487.69	0	0	0	0	0	1	1	1	1	1	1
91	1	2	1	23700	58.602	1483.647	0	0	0	0	0	1	1	1	1	1	1
92	1	2	1	23750	58.602	1428.849	0	0	0	0	0	1	1	1	1	1	1
93	1	2	1	23800	58.602	1428.898	0	0	0	0	0	1	1	1	1	1	1
94	1	2	1	23850	58.602	1375.873	0	0	0	0	0	1	1	1	1	1	1
95	1	2	1	23900	58.602	1399.221	0	0	0	0	0	1	1	1	1	1	1
96	1	2	1	23950	58.602	137.47	0	0	0	0	0	1	1	1	1	1	1
1	1	2	1	24000	58.695	738.779	0	0	0	0	0	1	1	1	1	1	1
2	1	2	1	24050	58.695	727.849	0	0	0	0	0	1	1	1	1	1	1
3	1	2	1	24100	58.695	766.835	0	0	0	0	0	1	1	1	1	1	1
4	1	2	1	24150	58.695	750.415	0	0	0	0	0	1	1	1	1	1	1
5	1	2	1	24200	58.695	732.829	0	0	0	0	0	1	1	1	1	1	1
6	1	2	1	24250	58.695	741.887	0	0	0	0	0	1	1	1	1	1	1
7	1	2	1	24300	58.695	758.549	0	0	0	0	0	1	1	1	1	1	1
8	1	2	1	24350	58.695	155.188	0	0	0	0	0	1	1	1	1	1	1
9	1	2	1	24400	58.695	654.886	0	0	0	0	0	1	1	1	1	1	1
10	1	2	1	24450	58.695	612.631	0	0	0	0	0	1	1	1	1	1	1
11	1	2	1	24500	58.695	613.38	0	0	0	0	0	1	1	1	1	1	1
12	1	2	1	24550	58.695	612.855	0	0	0	0	0	1	1	1	1	1	1
13	1	2	1	24600	58.695	663.329	0	0	0	0	0	1	1	1	1	1	1
14	1	2	1	24650	58.695	654.812	0	0	0	0	0	1	1	1	1	1	1
15	1	2	1	24700	58.695	649.206	0	0	0	0	0	1	1	1	1	1	1
16	1	2	1	24750	58.695	141.291	0	0	0	0	0	1	1	1	1	1	1
17	1	2	1	24800	58.695	848.513	0	0	0	0	0	1	1	1	1	1	1
18	1	2	1	24850	58.695	818.759	0	0	0	0	0	1	1	1	1	1	1
19	1	2	1	24900	58.695	853.361	0	0	0	0	0	1	1	1	1	1	1
20	1	2	1	24950	58.695	809.472	0	0	0	0	0	1	1	1	1	1	1
21	1	2	1	25000	58.695	866.684	0	0	0	0	0	1	1	1	1	1	1
22	1	2	1	25050	58.695	866.112	0	0	0	0	0	1	1	1	1	1	1
23	1	2	1	25100	58.695	819.63	0	0	0	0	0	1	1	1	1	1	1
24	1	2	1	25150	58.695	156.065	0	0	0	0	0	1	1	1	1	1	1
25	1	2	1	25200	58.695	866.872	0	0	0	0	0	1	1	1	1	1	1
26	1	2	1	25250	58.695	806.999	0	0	0	0	0	1	1	1	1	1	1
27	1	2	1	25300	58.695	838.148	0	0	0	0	0	1	1	1	1	1	1
28	1	2	1	25350	58.695	836.543	0	0	0	0	0	1	1	1	1	1	1
29	1	2	1	25400	58.695	857.814	0	0	0	0	0	1	1	1	1	1	1
30	1	2	1	25450	58.695	824.494	0	0	0	0	0	1	1	1	1	1	1
31	1	2	1	25500	58.695	835.965	0	0	0	0	0	1	1	1	1	1	1
32	1	2	1	25550	58.695	149.361	0	0	0	0	0	1	1	1	1	1	1
33	1	2	1	25600	58.695	1130.402	0	0	0	0	0	1	1	1	1	1	1
34	1	2	1	25650	58.695	1077.116	0	0	0	0	0	1	1	1	1	1	1
35	1	2	1	25700	58.695	1176.473	0	0	0	0	0	1	1	1	1	1	1
36	1	2	1	25750	58.695	1115.415	0	0	0	0	0	1	1	1	1	1	1
37	1	2	1	25800	58.695	1148.242	0	0	0	0	0	1	1	1	1	1	1
38	1	2	1	25850	58.695	1167.855	0	0	0	0	0	1	1	1	1	1	1
39	1	2	1	25900	58.695	1106.312	0	0	0	0	0	1	1	1	1	1	1
40	1	2	1	25950	58.695	158.178	0	0	0	0	0	1	1	1	1	1	1
41	1	2	1	26000	58.695	1096.099	0	0	0	0	0	1	1	1	1	1	1
42	1	2	1	26050	58.695	1106.308	0	0	0	0	0	1	1	1	1	1	1
43	1	2	1	26100	58.695	1151.063	0	0	0	0	0	1	1	1	1	1	1
44	1	2	1	26150	58.695	1216.71	0	0	0	0	0	1	1	1	1	1	1
45	1	2	1	26200	58.695	1185.005	0	0	0	0	0	1	1	1	1	1	1
46	1	2	1	26250	58.695	1147.95	0	0	0	0	0	1	1	1	1	1	1
47	1	2	1	26300	58.695	1143.409	0	0	0	0	0	1	1	1	1	1	1
48	1	2	1	26350	58.695	154.199	0	0	0	0	0	1	1	1	1	1	1
49	1	2	1	26400	58.695	1186.777	0	0	0	0	0	1	1	1	1	1	1
50	1	2	1	26450	58.695	1223.559	0	0	0	0	0	1	1	1	1	1	1
51	1	2	1	26500	58.695	1390.307	0	0	0	0	0	1	1	1	1	1	1
52	1	2	1	26550	58.695	1327.539	0	0	0	0	0	1	1	1	1	1	1
53	1	2	1	26600	58.695	1395.701	0	0	0	0	0	1	1	1	1	1	1
54	1	2	1	26650	58.695	1321.27	0	0	0	0	0	1	1	1	1	1	1
55	1	2	1	26700	58.695	1203.968	0	0	0	0	0	1	1	1	1	1	1
56	1	2	1	26750	58.695	134.523	0	0	0	0	0	1	1	1	1	1	1
57	1	2	1	26800	58.695	1211.16	0	0	0	0	0	1	1	1	1	1	1
58	1	2	1	26850	58.695	1192.046	0	0	0	0	0	1	1	1	1	1	1
59	1	2	1	26900	58.695	1239.057	0	0	0	0	0	1	1	1	1	1	1
60	1	2	1	26950	58.695	1250.92	0	0	0	0	0	1	1	1	1	1	1
61	1	2	1	27000	58.695	1254.493	0	0	0	0	0	1	1	1	1	1	1
62	1	2	1	27050	58.695	1236.162	0	0	0	0	0	1	1	1	1	1	1
63	1	2	1	27100	58.695	1143.476	0	0	0	0	0	1	1	1	1	1	1
64	1	2	1	27150	58.695	143.153	0	0	0	0	0	1	1	1	1	1	1
65	1	2	1	27200	58.695	1356.977	0	0	0	0	0	1	1	1	1	1	1
66	1	2	1	27250	58.695	1319.002	0	0	0	0	0	1	1	1	1	1	1
67	1	2	1	27300	58.695	1399.486	0	0	0	0	0	1	1	1	1	1	1
68	1	2	1	27350	58.695	1343.651	0	0	0	0	0	1	1	1	1	1	1
69	1	2	1	27400	58.695	1420.248	0	0	0	0	0	1	1	1	1	1	1
70	1	2	1	27450	58.695	1296.49	0	0	0	0	0	1	1	1	1	1	1
71	1	2	1	27500	58.695	1283.259	0	0	0	0	0	1	1	1	1	1	1
72	1	2	1	27550	58.695	163.523	0	0	0	0	0	1	1	1	1	1	1
73	1	2	1	27600	58.695	1352.757	0	0	0	0	0	1	1	1	1	1	1
74	1	2	1	27650	58.695	1265.185	0	0	0	0	0	1	1	1	1	1	1
75	1	2	1	27700	58.695	1263.166	0	0	0	0	0	1	1	1	1	1	1
76	1	2	1	27750	58.695	1208.895	0	0	0	0	0	1	1	1	1	1	1
77	1	2	1	27800	58.695	1192.313	0	0	0	0	0	1	1	1	1	1	1
78	1	2	1	27850	58.695	1157.647	0	0	0	0	0	1	1	1	1	1	1
79	1	2	1	27900	58.695	1185.253	0	0	0	0	0	1	1	1	1	1	1
80	1	2	1	27950	58.695	149.536	0	0	0	0	0	1	1	1	1	1	1
81	1	2	1	28000	58.695	1578.149	0	0	0	0	0	1	1	1	1	1	1
82	1	2	1	28050	58.695	1413.421	0	0	0	0	0	1	1	1	1	1	1
83	1	2	1	28100	58.695	1422.711	0	0	0	0	0	1	1	1	1	1	1
84	1	2	1	28150	58.695	1369.305	0	0	0	0	0	1	1	1	1	1	1
85	1	2	1	28200	58.695	1405.656	0	0	0	0	0	1	1	1	1	1	1
86	1	2	1	28250	58.695	1368.327	0	0	0	0	0	1	1	1	1	1	1
87	1	2	1	28300	58.695	1309.93	0	0	0	0	0	1	1	1	1	1	1
88	1	2	1	28350	58.695	145.657	0	0	0	0	0	1	1	1	1	1	1
89	1	2	1	28400	58.695	1524.452	0	0	0	0	0	1	1	1	1	1	1
90	1	2	1	28450	58.695	1485.285	0	0	0	0	0	1	1	1	1	1	1
91	1	2	1	28500	58.695	1481.416	0	0	0	0	0	1	1	1	1	1	1
92	1	2	1	28550	58.695	1426.263	0	0	0	0	0	1	1	1	1	1	1
93	1	2	1	28600	58.695	1426.593	0	0	0	0	0	1	1	1	1	1	1
94	1	2	1	28650	58.695	1373.545	0	0	0	0	0	1	1	1	1	1	1
95	1	2	1	28700	58.695	1397.132	0	0	0	0	0	1	1	1	1	1	1
96	1	2	1	28750	58.695	137.212	0	0	0	0	0	1	1	1	1	1	1
1	1	2	1	28800	58.795	737.282	0	0	0	0	0	1	1	1	1	1	1
2	1	2	1	28850	58.795	726.301	0	0	0	0	0	1	1	1	1	1	1
3	1	2	1	28900	58.795	764.992	0	0	0	0	0	1	1	1	1	1	1
4	1	2	1	28950	58.795	749.085	0	0	0	0	0	1	1	1	1	1	1
5	1	2	1	29000	58.795	731.305	0	0	0	0	0	1	1	1	1	1	1
6	1	2	1	29050	58.795	740.351	0	0	0	0	0	1	1	1	1	1	1
7	1	2	1	29100	58.795	757.065	0	0	0	0	0	1	1	1	1	1	1
8	1	2	1	29150	58.795	154.674	0	0	0	0	0	1	1	1	1	1	1
9	1	2	1	29200	58.795	653.432	0	0	0	0	0	1	1	1	1	1	1
10	1	2	1	29250	58.795	611.355	0	0	0	0	0	1	1	1	1	1	1
11	1	2	1	29300	58.795	612.071	0	0	0	0	0	1	1	1	1	1	1
12	1	2	1	29350	58.795	611.351	0	0	0	0	0	1	1	1	1	1	1
13	1	2	1	29400	58.795	661.96	0	0	0	0	0	1	1	1	1	1	1
14	1	2	1	29450	58.795	653.258	0	0	0	0	0	1	1	1	1	1	1
15	1	2	1	29500	58.795	648.234	0	0	0	0	0	1	1	1	1	1	1
16	1	2	1	29550	58.795	140.861	0	0	0	0	0	1	1	1	1	1	1
17	1	2	1	29600	58.795	846.588	0	0	0	0	0	1	1	1	1	1	1
18	1	2	1	29650	58.795	816.917	0	0	0	0	0	1	1	1	1	1	1
19	1	2	1	29700	58.795	851.716	0	0	0	0	0	1	1	1	1	1	1
20	1	2	1	29750	58.795	807.625	0	0	0	0	0	1	1	1	1	1	1
21	1	2	1	29800	58.795	864.803	0	0	0	0	0	1	1	1	1	1	1
22	1	2	1	29850	58.795	864.226	0	0	0	0	0	1	1	1	1	1	1
23	1	2	1	29900	58.795	818.277	0	0	0	0	0	1	1	1	1	1	1
24	1	2	1	29950	58.795	155.523	0	0	0	0	0	1	1	1	1	1	1
25	1	2	1	30000	58.795	864.801	0	0	0	0	0	1	1	1	1	1	1
26	1	2	1	30050	58.795	805.361	0	0	0	0	0	1	1	1	1	1	1
27	1	2	1	30100	58.795	836.408	0	0	0	0	0	1	1	1	1	1	1
28	1	2	1	30150	58.795	834.729	0	0	0	0	0	1	1	1	1	1	1
29	1	2	1	30200	58.795	855.852	0	0	0	0	0	1	1	1	1	1	1
30	1	2	1	30250	58.795	822.652	0	0	0	0	0	1	1	1	1	1	1
31	1	2	1	30300	58.795	834.269	0	0	0	0	0	1	1	1	1	1	1
32	1	2	1	30350	58.795	148.897	0	0	0	0	0	1	1	1	1	1	1
33	1	2	1	30400	58.795	1128.334	0	0	0	0	0	1	1	1	1	1	1
34	1	2	1	30450	58.795	1075.387	0	0	0	0	0	1	1	1	1	1	1
35	1	2	1	30500	58.795	1174.392	0	0	0	0	0	1	1	1	1	1	1
36	1	2	1	30550	58.795	1113.52	0	0	0	0	0	1	1	1	1	1	1
37	1	2	1	30600	58.795	1146.278	0	0	0	0	0	1	1	1	1	1	1
38	1	2	1	30650	58.795	1165.593	0	0	0	0	0	1	1	1	1	1	1
39	1	2	1	30700	58.795	1103.99	0	0	0	0	0	1	1	1	1	1	1
40	1	2	1	30750	58.795	157.703	0	0	0	0	0	1	1	1	1	1	1
41	1	2	1	30800	58.795	1094.064	0	0	0	0	0	1	1	1	1	1	1
42	1	2	1	30850	58.795	1104.527	0	0	0	0	0	1	1	1	1	1	1
43	1	2	1	30900	58.795	1148.845	0	0	0	0	0	1	1	1	1	1	1
44	1	2	1	30950	58.795	1214.354	0	0	0	0	0	1	1	1	1	1	1
45	1	2	1	31000	58.795	1182.631	0	0	0	0	0	1	1	1	1	1	1
46	1	2	1	31050	58.795	1145.91	0	0	0	0	0	1	1	1	1	1	1
47	1	2	1	31100	58.795	1141.604	0	0	0	0	0	1	1	1	1	1	1
48	1	2	1	31150	58.795	153.708	0	0	0	0	0	1	1	1	1	1	1
49	1	2	1	31200	58.795	1184.616	0	0	0	0	0	1	1	1	1	1	1
50	1	2	1	31250	58.795	1221.651	0	0	0	0	0	1	1	1	1	1	1
51	1	2	1	31300	58.795	1388.023	0	0	0	0	0	1	1	1	1	1	1
52	1	2	1	31350	58.795	1325.034	0	0	0	0	0	1	1	1	1	1	1
53	1	2	1	31400	58.795	1393.116	0	0	0	0	0	1	1	1	1	1	1
54	1	2	1	31450	58.795	1318.766	0	0	0	0	0	1	1	1	1	1	1
55	1	2	1	31500	58.795	1202.108	0	0	0	0	0	1	1	1	1	1	1
56	1	2	1	31550	58.795	134.227	0	0	0	0	0	1	1	1	1	1	1
57	1	2	1	31600	58.795	1209.303	0	0	0	0	0	1	1	1	1	1	1
58	1	2	1	31650	58.795	1189.975	0	0	0	0	0	1	1	1	1	1	1
59	1	2	1	31700	58.795	1236.803	0	0	0	0	0	1	1	1	1	1	1
60	1	2	1	31750	58.795	1248.55	0	0	0	0	0	1	1	1	1	1	1
61	1	2	1	31800	58.795	1252.376	0	0	0	0	0	1	1	1	1	1	1
62	1	2	1	31850	58.795	1234.111	0	0	0	0	0	1	1	1	1	1	1
63	1	2	1	31900	58.795	1141.466	0	0	0	0	0	1	1	1	1	1	1
64	1	2	1	31950	58.795	142.716	0	0	0	0	0	1	1	1	1	1	1
65	1	2	1	32000	58.795	1354.436	0	0	0	0	0	1	1	1	1	1	1
66	1	2	1	32050	58.795	1317.152	0	0	0	0	0	1	1	1	1	1	1
67	1	2	1	32100	58.795	1397.468	0	0	0	0	0	1	1	1	1	1	1
68	1	2	1	32150	58.795	1341.516	0	0	0	0	0	1	1	1	1	1	1
69	1	2	1	32200	58.795	1417.779	0	0	0	0	0	1	1	1	1	1	1
70	1	2	1	32250	58.795	1294.29	0	0	0	0	0	1	1	1	1	1	1
71	1	2	1	32300	58.795	1281.402	0	0	0	0	0	1	1	1	1	1	1
72	1	2	1	32350	58.795	162.832	0	0	0	0	0	1	1	1	1	1	1
73	1	2	1	32400	58.795	1350.437	0	0	0	0	0	1	1	1	1	1	1
74	1	2	1	32450	58.795	1263.424	0	0	0	0	0	1	1	1	1	1	1
75	1	2	1	32500	58.795	1261.027	0	0	0	0	0	1	1	1	1	1	1
76	1	2	1	32550	58.795	1207.05	0	0	0	0	0	1	1	1	1	1	1
77	1	2	1	32600	58.795	1190.435	0	0	0	0	0	1	1	1	1	1	1
78	1	2	1	32650	58.795	1155.517	0	0	0	0	0	1	1	1	1	1	1
79	1	2	1	32700	58.795	1183.306	0	0	0	0	0	1	1	1	1	1	1
80	1	2	1	32750	58.795	148.98	0	0	0	0	0	1	1	1	1	1	1
81	1	2	1	32800	58.795	1575.708	0	0	0	0	0	1	1	1	1	1	1
82	1	2	1	32850	58.795	1411.738	0	0	0	0	0	1	1	1	1	1	1
83	1	2	1	32900	58.795	1420.569	0	0	0	0	0	1	1	1	1	1	1
84	1	2	1	32950	58.795	1367.851	0	0	0	0	0	1	1	1	1	1	1
85	1	2	1	33000	58.795	1404.154	0	0	0	0	0	1	1	1	1	1	1
86	1	2	1	33050	58.795	1365.98	0	0	0	0	0	1	1	1	1	1	1
87	1	2	1	33100	58.795	1308.147	0	0	0	0	0	1	1	1	1	1	1
88	1	2	1	33150	58.795	145.142	0	0	0	0	0	1	1	1	1	1	1
89	1	2	1	33200	58.795	1521.893	0	0	0	0	0	1	1	1	1	1	1
90	1	2	1	33250	58.795	1482.992	0	0	0	0	0	1	1	1	1	1	1
91	1	2	1	33300	58.795	1478.88	0	0	0	0	0	1	1	1	1	1	1
92	1	2	1	33350	58.795	1424.164	0	0	0	0	0	1	1	1	1	1	1
93	1	2	1	33400	58.795	1424.487	0	0	0	0	0	1	1	1	1	1	1
94	1	2	1	33450	58.795	1371.778	0	0	0	0	0	1	1	1	1	1	1
95	1	2	1	33500	58.795	1395.123	0	0	0	0	0	1	1	1	1	1	1
96	1	2	1	33550	58.795	136.691	0	0	0	0	0	1	1	1	1	1	1
1	1	2	1	33600	58.89	735.388	0	0	0	0	0	1	1	1	1	1	1
2	1	2	1	33650	58.89	724.503	0	0	0	0	0	1	1	1	1	1	1
3	1	2	1	33700	58.89	763.543	0	0	0	0	0	1	1	1	1	1	1
4	1	2	1	33750	58.89	747.372	0	0	0	0	0	1	1	1	1	1	1
5	1	2	1	33800	58.89	729.875	0	0	0	0	0	1	1	1	1	1	1
6	1	2	1	33850	58.89	738.664	0	0	0	0	0	1	1	1	1	1	1
7	1	2	1	33900	58.89	755.451	0	0	0	0	0	1	1	1	1	1	1
8	1	2	1	33950	58.89	154.414	0	0	0	0	0	1	1	1	1	1	1
9	1	2	1	34000	58.89	652.014	0	0	0	0	0	1	1	1	1	1	1
10	1	2	1	34050	58.89	609.962	0	0	0	0	0	1	1	1	1	1	1
11	1	2	1	34100	58.89	610.954	0	0	0	0	0	1	1	1	1	1	1
12	1	2	1	34150	58.89	610.047	0	0	0	0	0	1	1	1	1	1	1
13	1	2	1	34200	58.89	660.507	0	0	0	0	0	1	1	1	1	1	1
14	1	2	1	34250	58.89	652.062	0	0	0	0	0	1	1	1	1	1	1
15	1	2	1	34300	58.89	646.772	0	0	0	0	0	1	1	1	1	1	1
16	1	2	1	34350	58.89	140.622	0	0	0	0	0	1	1	1	1	1	1
17	1	2	1	34400	58.89	844.945	0	0	0	0	0	1	1	1	1	1	1
18	1	2	1	34450	58.89	815.18	0	0	0	0	0	1	1	1	1	1	1
19	1	2	1	34500	58.89	850.087	0	0	0	0	0	1	1	1	1	1	1
20	1	2	1	34550	58.89	806.087	0	0	0	0	0	1	1	1	1	1	1
21	1	2	1	34600	58.89	862.907	0	0	0	0	0	1	1	1	1	1	1
22	1	2	1	34650	58.89	862.464	0	0	0	0	0	1	1	1	1	1	1
23	1	2	1	34700	58.89	816.701	0	0	0	0	0	1	1	1	1	1	1
24	1	2	1	34750	58.89	155.025	0	0	0	0	0	1	1	1	1	1	1
25	1	2	1	34800	58.89	863.172	0	0	0	0	0	1	1	1	1	1	1
26	1	2	1	34850	58.89	803.561	0	0	0	0	0	1	1	1	1	1	1
27	1	2	1	34900	58.89	834.743	0	0	0	0	0	1	1	1	1	1	1
28	1	2	1	34950	58.89	833.113	0	0	0	0	0	1	1	1	1	1	1
29	1	2	1	35000	58.89	854.293	0	0	0	0	0	1	1	1	1	1	1
30	1	2	1	35050	58.89	820.981	0	0	0	0	0	1	1	1	1	1	1
31	1	2	1	35100	58.89	832.465	0	0	0	0	0	1	1	1	1	1	1
32	1	2	1	35150	58.89	148.335	0	0	0	0	0	1	1	1	1	1	1
33	1	2	1	35200	58.89	1126.237	0	0	0	0	0	1	1	1	1	1	1
34	1	2	1	35250	58.89	1073.325	0	0	0	0	0	1	1	1	1	1	1
35	1	2	1	35300	58.89	1171.849	0	0	0	0	0	1	1	1	1	1	1
36	1	2	1	35350	58.89	1111.419	0	0	0	0	0	1	1	1	1	1	1
37	1	2	1	35400	58.89	1144.023	0	0	0	0	0	1	1	1	1	1	1
38	1	2	1	35450	58.89	1163.534	0	0	0	0	0	1	1	1	1	1	1
39	1	2	1	35500	58.89	1102.632	0	0	0	0	0	1	1	1	1	1	1
40	1	2	1	35550	58.89	157.269	0	0	0	0	0	1	1	1	1	1	1
41	1	2	1	35600	58.89	1091.793	0	0	0	0	0	1	1	1	1	1	1
42	1	2	1	35650	58.89	1102.529	0	0	0	0	0	1	1	1	1	1	1
43	1	2	1	35700	58.89	1147.021	0	0	0	0	0	1	1	1	1	1	1
44	1	2	1	35750	58.89	1211.885	0	0	0	0	0	1	1	1	1	1	1
45	1	2	1	35800	58.89	1180.65	0	0	0	0	0	1	1	1	1	1	1
46	1	2	1	35850	58.89	1143.335	0	0	0	0	0	1	1	1	1	1	1
47	1	2	1	35900	58.89	1139.58	0	0	0	0	0	1	1	1	1	1	1
48	1	2	1	35950	58.89	153.263	0	0	0	0	0	1	1	1	1	1	1
49	1	2	1	36000	58.89	1182.385	0	0	0	0	0	1	1	1	1	1	1
50	1	2	1	36050	58.89	1219.624	0	0	0	0	0	1	1	1	1	1	1
51	1	2	1	36100	58.89	1385.513	0	0	0	0	0	1	1	1	1	1	1
52	1	2	1	36150	58.89	1322.679	0	0	0	0	0	1	1	1	1	1	1
53	1	2	1	36200	58.89	1390.544	0	0	0	0	0	1	1	1	1	1	1
54	1	2	1	36250	58.89	1316.417	0	0	0	0	0	1	1	1	1	1	1
55	1	2	1	36300	58.89	1200.09	0	0	0	0	0	1	1	1	1	1	1
56	1	2	1	36350	58.89	133.933	0	0	0	0	0	1	1	1	1	1	1
57	1	2	1	36400	58.89	1206.916	0	0	0	0	0	1	1	1	1	1	1
58	1	2	1	36450	58.89	1187.906	0	0	0	0	0	1	1	1	1	1	1
59	1	2	1	36500	58.89	1235.081	0	0	0	0	0	1	1	1	1	1	1
60	1	2	1	36550	58.89	1246.322	0	0	0	0	0	1	1	1	1	1	1
61	1	2	1	36600	58.89	1250.01	0	0	0	0	0	1	1	1	1	1	1
62	1	2	1	36650	58.89	1232.191	0	0	0	0	0	1	1	1	1	1	1
63	1	2	1	36700	58.89	1139.45	0	0	0	0	0	1	1	1	1	1	1
64	1	2	1	36750	58.89	142.232	0	0	0	0	0	1	1	1	1	1	1
65	1	2	1	36800	58.89	1352.602	0	0	0	0	0	1	1	1	1	1	1
66	1	2	1	36850	58.89	1315.344	0	0	0	0	0	1	1	1	1	1	1
67	1	2	1	36900	58.89	1395.102	0	0	0	0	0	1	1	1	1	1	1
68	1	2	1	36950	58.89	1339.305	0	0	0	0	0	1	1	1	1	1	1
69	1	2	1	37000	58.89	1415.478	0	0	0	0	0	1	1	1	1	1	1
70	1	2	1	37050	58.89	1292.371	0	0	0	0	0	1	1	1	1	1	1
71	1	2	1	37100	58.89	1279.374	0	0	0	0	0	1	1	1	1	1	1
72	1	2	1	37150	58.89	162.336	0	0	0	0	0	1	1	1	1	1	1
73	1	2	1	37200	58.89	1348.111	0	0	0	0	0	1	1	1	1	1	1
74	1	2	1	37250	58.89	1261.225	0	0	0	0	0	1	1	1	1	1	1
75	1	2	1	37300	58.89	1258.946	0	0	0	0	0	1	1	1	1	1	1
76	1	2	1	37350	58.89	1205.054	0	0	0	0	0	1	1	1	1	1	1
77	1	2	1	37400	58.89	1188.299	0	0	0	0	0	1	1	1	1	1	1
78	1	2	1	37450	58.89	1153.847	0	0	0	0	0	1	1	1	1	1	1
79	1	2	1	37500	58.89	1181.789	0	0	0	0	0	1	1	1	1	1	1
80	1	2	1	37550	58.89	148.542	0	0	0	0	0	1	1	1	1	1	1
81	1	2	1	37600	58.89	1573.377	0	0	0	0	0	1	1	1	1	1	1
82	1	2	1	37650	58.89	1409.763	0	0	0	0	0	1	1	1	1	1	1
83	1	2	1	37700	58.89	1418.457	0	0	0	0	0	1	1	1	1	1	1
84	1	2	1	37750	58.89	1366.063	0	0	0	0	0	1	1	1	1	1	1
85	1	2	1	37800	58.89	1402.454	0	0	0	0	0	1	1	1	1	1	1
86	1	2	1	37850	58.89	1363.91	0	0	0	0	0	1	1	1	1	1	1
87	1	2	1	37900	58.89	1306.433	0	0	0	0	0	1	1	1	1	1	1
88	1	2	1	37950	58.89	144.711	0	0	0	0	0	1	1	1	1	1	1
89	1	2	1	38000	58.89	1519.781	0	0	0	0	0	1	1	1	1	1	1
90	1	2	1	38050	58.89	1480.729	0	0	0	0	0	1	1	1	1	1	1
91	1	2	1	38100	58.89	1476.776	0	0	0	0	0	1	1	1	1	1	1
92	1	2	1	38150	58.89	1422.086	0	0	0	0	0	1	1	1	1	1	1
93	1	2	1	38200	58.89	1422.528	0	0	0	0	0	1	1	1	1	1	1
94	1	2	1	38250	58.89	1369.606	0	0	0	0	0	1	1	1	1	1	1
95	1	2	1	38300	58.89	1393.071	0	0	0	0	0	1	1	1	1	1	1
96	1	2	1	38350	58.89	136.355	0	0	0	0	0	1	1	1	1	1	1
1	1	2	1	38400	58.987	733.878	0	0	0	0	0	1	1	1	1	1	1
2	1	2	1	38450	58.987	723.039	0	0	0	0	0	1	1	1	1	1	1
3	1	2	1	38500	58.987	761.792	0	0	0	0	0	1	1	1	1	1	1
4	1	2	1	38550	58.987	745.592	0	0	0	0	0	1	1	1	1	1	1
5	1	2	1	38600	58.987	728.14	0	0	0	0	0	1	1	1	1	1	1
6	1	2	1	38650	58.987	737.225	0	0	0	0	0	1	1	1	1	1	1
7	1	2	1	38700	58.987	753.769	0	0	0	0	0	1	1	1	1	1	1
8	1	2	1	38750	58.987	153.956	0	0	0	0	0	1	1	1	1	1	1
9	1	2	1	38800	58.987	650.646	0	0	0	0	0	1	1	1	1	1	1
10	1	2	1	38850	58.987	608.65	0	0	0	0	0	1	1	1	1	1	1
11	1	2	1	38900	58.987	609.341	0	0	0	0	0	1	1	1	1	1	1
12	1	2	1	38950	58.987	608.709	0	0	0	0	0	1	1	1	1	1	1
13	1	2	1	39000	58.987	658.984	0	0	0	0	0	1	1	1	1	1	1
14	1	2	1	39050	58.987	650.4	0	0	0	0	0	1	1	1	1	1	1
15	1	2	1	39100	58.987	645.331	0	0	0	0	0	1	1	1	1	1	1
16	1	2	1	39150	58.987	140.085	0	0	0	0	0	1	1	1	1	1	1
17	1	2	1	39200	58.987	843.156	0	0	0	0	0	1	1	1	1	1	1
18	1	2	1	39250	58.987	813.815	0	0	0	0	0	1	1	1	1	1	1
19	1	2	1	39300	58.987	848.236	0	0	0	0	0	1	1	1	1	1	1
20	1	2	1	39350	58.987	804.407	0	0	0	0	0	1	1	1	1	1	1
21	1	2	1	39400	58.987	861.08	0	0	0	0	0	1	1	1	1	1	1
22	1	2	1	39450	58.987	860.47	0	0	0	0	0	1	1	1	1	1	1
23	1	2	1	39500	58.987	815.125	0	0	0	0	0	1	1	1	1	1	1
24	1	2	1	39550	58.987	154.474	0	0	0	0	0	1	1	1	1	1	1
25	1	2	1	39600	58.987	861.269	0	0	0	0	0	1	1	1	1	1	1
26	1	2	1	39650	58.987	802.269	0	0	0	0	0	1	1	1	1	1	1
27	1	2	1	39700	58.987	832.769	0	0	0	0	0	1	1	1	1	1	1
28	1	2	1	39750	58.987	831.285	0	0	0	0	0	1	1	1	1	1	1
29	1	2	1	39800	58.987	852.529	0	0	0	0	0	1	1	1	1	1	1
30	1	2	1	39850	58.987	819.15	0	0	0	0	0	1	1	1	1	1	1
31	1	2	1	39900	58.987	830.852	0	0	0	0	0	1	1	1	1	1	1
32	1	2	1	39950	58.987	147.762	0	0	0	0	0	1	1	1	1	1	1
33	1	2	1	40000	58.987	1124.029	0	0	0	0	0	1	1	1	1	1	1
34	1	2	1	40050	58.987	1071.807	0	0	0	0	0	1	1	1	1	1	1
35	1	2	1	40100	58.987	1169.726	0	0	0	0	0	1	1	1	1	1	1
36	1	2	1	40150	58.987	1109.165	0	0	0	0	0	1	1	1	1	1	1
37	1	2	1	40200	58.987	1141.866	0	0	0	0	0	1	1	1	1	1	1
38	1	2	1	40250	58.987	1161.183	0	0	0	0	0	1	1	1	1	1	1
39	1	2	1	40300	58.987	1100.37	0	0	0	0	0	1	1	1	1	1	1
40	1	2	1	40350	58.987	156.758	0	0	0	0	0	1	1	1	1	1	1
41	1	2	1	40400	58.987	1089.798	0	0	0	0	0	1	1	1	1	1	1
42	1	2	1	40450	58.987	1100.507	0	0	0	0	0	1	1	1	1	1	1
43	1	2	1	40500	58.987	1144.644	0	0	0	0	0	1	1	1	1	1	1
44	1	2	1	40550	58.987	1209.679	0	0	0	0	0	1	1	1	1	1	1
45	1	2	1	40600	58.987	1178.146	0	0	0	0	0	1	1	1	1	1	1
46	1	2	1	40650	58.987	1141.391	0	0	0	0	0	1	1	1	1	1	1
47	1	2	1	40700	58.987	1137.868	0	0	0	0	0	1	1	1	1	1	1
48	1	2	1	40750	58.987	152.854	0	0	0	0	0	1	1	1	1	1	1
49	1	2	1	40800	58.987	1180.497	0	0	0	0	0	1	1	1	1	1	1
50	1	2	1	40850	58.987	1217.721	0	0	0	0	0	1	1	1	1	1	1
51	1	2	1	40900	58.987	1383.004	0	0	0	0	0	1	1	1	1	1	1
52	1	2	1	40950	58.987	1320.147	0	0	0	0	0	1	1	1	1	1	1
53	1	2	1	41000	58.987	1388.123	0	0	0	0	0	1	1	1	1	1	1
54	1	2	1	41050	58.987	1314.03	0	0	0	0	0	1	1	1	1	1	1
55	1	2	1	41100	58.987	1198.149	0	0	0	0	0	1	1	1	1	1	1
56	1	2	1	41150	58.987	133.557	0	0	0	0	0	1	1	1	1	1	1
57	1	2	1	41200	58.987	1204.679	0	0	0	0	0	1	1	1	1	1	1
58	1	2	1	41250	58.987	1185.967	0	0	0	0	0	1	1	1	1	1	1
59	1	2	1	41300	58.987	1232.663	0	0	0	0	0	1	1	1	1	1	1
60	1	2	1	41350	58.987	1244.071	0	0	0	0	0	1	1	1	1	1	1
61	1	2	1	41400	58.987	1247.861	0	0	0	0	0	1	1	1	1	1	1
62	1	2	1	41450	58.987	1229.828	0	0	0	0	0	1	1	1	1	1	1
63	1	2	1	41500	58.987	1137.198	0	0	0	0	0	1	1	1	1	1	1
64	1	2	1	41550	58.987	141.738	0	0	0	0	0	1	1	1	1	1	1
65	1	2	1	41600	58.987	1350.539	0	0	0	0	0	1	1	1	1	1	1
66	1	2	1	41650	58.987	1313.023	0	0	0	0	0	1	1	1	1	1	1
67	1	2	1	41700	58.987	1392.943	0	0	0	0	0	1	1	1	1	1	1
68	1	2	1	41750	58.987	1336.977	0	0	0	0	0	1	1	1	1	1	1
69	1	2	1	41800	58.987	1413.269	0	0	0	0	0	1	1	1	1	1	1
70	1	2	1	41850	58.987	1290.164	0	0	0	0	0	1	1	1	1	1	1
71	1	2	1	41900	58.987	1277.736	0	0	0	0	0	1	1	1	1	1	1
72	1	2	1	41950	58.987	161.686	0	0	0	0	0	1	1	1	1	1	1
73	1	2	1	42000	58.987	1346.085	0	0	0	0	0	1	1	1	1	1	1
74	1	2	1	42050	58.987	1259.591	0	0	0	0	0	1	1	1	1	1	1
75	1	2	1	42100	58.987	1257.288	0	0	0	0	0	1	1	1	1	1	1
76	1	2	1	42150	58.987	1202.628	0	0	0	0	0	1	1	1	1	1	1
77	1	2	1	42200	58.987	1186.363	0	0	0	0	0	1	1	1	1	1	1
78	1	2	1	42250	58.987	1151.624	0	0	0	0	0	1	1	1	1	1	1
79	1	2	1	42300	58.987	1180.134	0	0	0	0	0	1	1	1	1	1	1
80	1	2	1	42350	58.987	147.943	0	0	0	0	0	1	1	1	1	1	1
81	1	2	1	42400	58.987	1570.676	0	0	0	0	0	1	1	1	1	1	1
82	1	2	1	42450	58.987	1408.462	0	0	0	0	0	1	1	1	1	1	1
83	1	2	1	42500	58.987	1416.39	0	0	0	0	0	1	1	1	1	1	1
84	1	2	1	42550	58.987	1364.176	0	0	0	0	0	1	1	1	1	1	1
85	1	2	1	42600	58.987	1400.465	0	0	0	0	0	1	1	1	1	1	1
86	1	2	1	42650	58.987	1361.858	0	0	0	0	0	1	1	1	1	1	1
87	1	2	1	42700	58.987	1304.761	0	0	0	0	0	1	1	1	1	1	1
88	1	2	1	42750	58.987	144.182	0	0	0	0	0	1	1	1	1	1	1
89	1	2	1	42800	58.987	1517.177	0	0	0	0	0	1	1	1	1	1	1
90	1	2	1	42850	58.987	1478.136	0	0	0	0	0	1	1	1	1	1	1
91	1	2	1	42900	58.987	1474.19	0	0	0	0	0	1	1	1	1	1	1
92	1	2	1	42950	58.987	1419.929	0	0	0	0	0	1	1	1	1	1	1
93	1	2	1	43000	58.987	1420.246	0	0	0	0	0	1	1	1	1	1	1
94	1	2	1	43050	58.987	1367.293	0	0	0	0	0	1	1	1	1	1	1
95	1	2	1	43100	58.987	1391.358	0	0	0	0	0	1	1	1	1	1	1
96	1	2	1	43150	58.987	135.868	0	0	0	0	0	1	1	1	1	1	1
1	1	2	1	43200	59.082	732.17	0	0	0	0	0	1	1	1	1	1	1
2	1	2	1	43250	59.082	721.357	0	0	0	0	0	1	1	1	1	1	1
3	1	2	1	43300	59.082	760.09	0	0	0	0	0	1	1	1	1	1	1
4	1	2	1	43350	59.082	744.289	0	0	0	0	0	1	1	1	1	1	1
5	1	2	1	43400	59.082	726.607	0	0	0	0	0	1	1	1	1	1	1
6	1	2	1	43450	59.082	735.702	0	0	0	0	0	1	1	1	1	1	1
7	1	2	1	43500	59.082	752.294	0	0	0	0	0	1	1	1	1	1	1
8	1	2	1	43550	59.082	153.534	0	0	0	0	0	1	1	1	1	1	1
9	1	2	1	43600	59.082	648.96	0	0	0	0	0	1	1	1	1	1	1
10	1	2	1	43650	59.082	607.554	0	0	0	0	0	1	1	1	1	1	1
11	1	2	1	43700	59.082	608.348	0	0	0	0	0	1	1	1	1	1	1
12	1	2	1	43750	59.082	607.178	0	0	0	0	0	1	1	1	1	1	1
13	1	2	1	43800	59.082	657.461	0	0	0	0	0	1	1	1	1	1	1
14	1	2	1	43850	59.082	649.239	0	0	0	0	0	1	1	1	1	1	1
15	1	2	1	43900	59.082	644.01	0	0	0	0	0	1	1	1	1	1	1
16	1	2	1	43950	59.082	139.805	0	0	0	0	0	1	1	1	1	1	1
17	1	2	1	44000	59.082	841.561	0	0	0	0	0	1	1	1	1	1	1
18	1	2	1	44050	59.082	812.081	0	0	0	0	0	1	1	1	1	1	1
19	1	2	1	44100	59.082	846.513	0	0	0	0	0	1	1	1	1	1	1
20	1	2	1	44150	59.082	802.663	0	0	0	0	0	1	1	1	1	1	1
21	1	2	1	44200	59.082	859.471	0	0	0	0	0	1	1	1	1	1	1
22	1	2	1	44250	59.082	858.656	0	0	0	0	0	1	1	1	1	1	1
23	1	2	1	44300	59.082	813.542	0	0	0	0	0	1	1	1	1	1	1
24	1	2	1	44350	59.082	153.904	0	0	0	0	0	1	1	1	1	1	1
25	1	2	1	44400	59.082	859.683	0	0	0	0	0	1	1	1	1	1	1
26	1	2	1	44450	59.082	800.349	0	0	0	0	0	1	1	1	1	1	1
27	1	2	1	44500	59.082	831.373	0	0	0	0	0	1	1	1	1	1	1
28	1	2	1	44550	59.082	829.577	0	0	0	0	0	1	1	1	1	1	1
29	1	2	1	44600	59.082	850.754	0	0	0	0	0	1	1	1	1	1	1
30	1	2	1	44650	59.082	817.575	0	0	0	0	0	1	1	1	1	1	1
31	1	2	1	44700	59.082	829.412	0	0	0	0	0	1	1	1	1	1	1
32	1	2	1	44750	59.082	147.288	0	0	0	0	0	1	1	1	1	1	1
33	1	2	1	44800	59.082	1121.927	0	0	0	0	0	1	1	1	1	1	1
34	1	2	1	44850	59.082	1069.878	0	0	0	0	0	1	1	1	1	1	1
35	1	2	1	44900	59.082	1167.591	0	0	0	0	0	1	1	1	1	1	1
36	1	2	1	44950	59.082	1107.041	0	0	0	0	0	1	1	1	1	1	1
37	1	2	1	45000	59.082	1139.765	0	0	0	0	0	1	1	1	1	1	1
38	1	2	1	45050	59.082	1159.277	0	0	0	0	0	1	1	1	1	1	1
39	1	2	1	45100	59.082	1098.382	0	0	0	0	0	1	1	1	1	1	1
40	1	2	1	45150	59.082	156.385	0	0	0	0	0	1	1	1	1	1	1
41	1	2	1	45200	59.082	1088.003	0	0	0	0	0	1	1	1	1	1	1
42	1	2	1	45250	59.082	1098.608	0	0	0	0	0	1	1	1	1	1	1
43	1	2	1	45300	59.082	1142.481	0	0	0	0	0	1	1	1	1	1	1
44	1	2	1	45350	59.082	1207.562	0	0	0	0	0	1	1	1	1	1	1
45	1	2	1	45400	59.082	1175.993	0	0	0	0	0	1	1	1	1	1	1
46	1	2	1	45450	59.082	1139.561	0	0	0	0	0	1	1	1	1	1	1
47	1	2	1	45500	59.082	1135.863	0	0	0	0	0	1	1	1	1	1	1
48	1	2	1	45550	59.082	152.466	0	0	0	0	0	1	1	1	1	1	1
49	1	2	1	45600	59.082	1178.422	0	0	0	0	0	1	1	1	1	1	1
50	1	2	1	45650	59.082	1215.32	0	0	0	0	0	1	1	1	1	1	1
51	1	2	1	45700	59.082	1380.619	0	0	0	0	0	1	1	1	1	1	1
52	1	2	1	45750	59.082	1317.793	0	0	0	0	0	1	1	1	1	1	1
53	1	2	1	45800	59.082	1385.863	0	0	0	0	0	1	1	1	1	1	1
54	1	2	1	45850	59.082	1311.431	0	0	0	0	0	1	1	1	1	1	1
55	1	2	1	45900	59.082	1196.456	0	0	0	0	0	1	1	1	1	1	1
56	1	2	1	45950	59.082	133.302	0	0	0	0	0	1	1	1	1	1	1
57	1	2	1	46000	59.082	1202.692	0	0	0	0	0	1	1	1	1	1	1
58	1	2	1	46050	59.082	1184.185	0	0	0	0	0	1	1	1	1	1	1
59	1	2	1	46100	59.082	1230.628	0	0	0	0	0	1	1	1	1	1	1
60	1	2	1	46150	59.082	1242.15	0	0	0	0	0	1	1	1	1	1	1
61	1	2	1	46200	59.082	1245.36	0	0	0	0	0	1	1	1	1	1	1
62	1	2	1	46250	59.082	1227.82	0	0	0	0	0	1	1	1	1	1	1
63	1	2	1	46300	59.082	1135.668	0	0	0	0	0	1	1	1	1	1	1
64	1	2	1	46350	59.082	141.351	0	0	0	0	0	1	1	1	1	1	1
65	1	2	1	46400	59.082	1348.148	0	0	0	0	0	1	1	1	1	1	1
66	1	2	1	46450	59.082	1311.165	0	0	0	0	0	1	1	1	1	1	1
67	1	2	1	46500	59.082	1390.868	0	0	0	0	0	1	1	1	1	1	1
68	1	2	1	46550	59.082	1334.423	0	0	0	0	0	1	1	1	1	1	1
69	1	2	1	46600	59.082	1411.08	0	0	0	0	0	1	1	1	1	1	1
70	1	2	1	46650	59.082	1287.629	0	0	0	0	0	1	1	1	1	1	1
71	1	2	1	46700	59.082	1275.889	0	0	0	0	0	1	1	1	1	1	1
72	1	2	1	46750	59.082	161.002	0	0	0	0	0	1	1	1	1	1	1
73	1	2	1	46800	59.082	1343.758	0	0	0	0	0	1	1	1	1	1	1
74	1	2	1	46850	59.082	1258.099	0	0	0	0	0	1	1	1	1	1	1
75	1	2	1	46900	59.082	1255.332	0	0	0	0	0	1	1	1	1	1	1
76	1	2	1	46950	59.082	1200.968	0	0	0	0	0	1	1	1	1	1	1
77	1	2	1	47000	59.082	1184.491	0	0	0	0	0	1	1	1	1	1	1
78	1	2	1	47050	59.082	1149.788	0	0	0	0	0	1	1	1	1	1	1
79	1	2	1	47100	59.082	1178.327	0	0	0	0	0	1	1	1	1	1	1
80	1	2	1	47150	59.082	147.362	0	0	0	0	0	1	1	1	1	1	1
81	1	2	1	47200	59.082	1568.387	0	0	0	0	0	1	1	1	1	1	1
82	1	2	1	47250	59.082	1406.315	0	0	0	0	0	1	1	1	1	1	1
83	1	2	1	47300	59.082	1414.474	0	0	0	0	0	1	1	1	1	1	1
84	1	2	1	47350	59.082	1363.03	0	0	0	0	0	1	1	1	1	1	1
85	1	2	1	47400	59.082	1398.754	0	0	0	0	0	1	1	1	1	1	1
86	1	2	1	47450	59.082	1360.405	0	0	0	0	0	1	1	1	1	1	1
87	1	2	1	47500	59.082	1303.112	0	0	0	0	0	1	1	1	1	1	1
88	1	2	1	47550	59.082	143.823	0	0	0	0	0	1	1	1	1	1	1
89	1	2	1	47600	59.082	1515.137	0	0	0	0	0	1	1	1	1	1	1
90	1	2	1	47650	59.082	1475.964	0	0	0	0	0	1	1	1	1	1	1
91	1	2	1	47700	59.082	1472.104	0	0	0	0	0	1	1	1	1	1	1
92	1	2	1	47750	59.082	1418.103	0	0	0	0	0	1	1	1	1	1	1
93	1	2	1	47800	59.082	1417.527	0	0	0	0	0	1	1	1	1	1	1
94	1	2	1	47850	59.082	1365.546	0	0	0	0	0	1	1	1	1	1	1
95	1	2	1	47900	59.082	1389.405	0	0	0	0	0	1	1	1	1	1	1
96	1	2	1	47950	59.082	135.503	0	0	0	0	0	1	1	1	1	1	1
1	1	2	1	48000	59.172	730.497	0	0	0	0	0	1	1	1	1	1	1
2	1	2	1	48050	59.172	720.046	0	0	0	0	0	1	1	1	1	1	1
3	1	2	1	48100	59.172	758.989	0	0	0	0	0	1	1	1	1	1	1
4	1	2	1	48150	59.172	743.028	0	0	0	0	0	1	1	1	1	1	1
5	1	2	1	48200	59.172	725.105	0	0	0	0	0	1	1	1	1	1	1
6	1	2	1	48250	59.172	734.236	0	0	0	0	0	1	1	1	1	1	1
7	1	2	1	48300	59.172	750.535	0	0	0	0	0	1	1	1	1	1	1
8	1	2	1	48350	59.172	153.052	0	0	0	0	0	1	1	1	1	1	1
9	1	2	1	48400	59.172	647.843	0	0	0	0	0	1	1	1	1	1	1
10	1	2	1	48450	59.172	606.441	0	0	0	0	0	1	1	1	1	1	1
11	1	2	1	48500	59.172	607.145	0	0	0	0	0	1	1	1	1	1	1
12	1	2	1	48550	59.172	606.351	0	0	0	0	0	1	1	1	1	1	1
13	1	2	1	48600	59.172	656.257	0	0	0	0	0	1	1	1	1	1	1
14	1	2	1	48650	59.172	647.719	0	0	0	0	0	1	1	1	1	1	1
15	1	2	1	48700	59.172	642.804	0	0	0	0	0	1	1	1	1	1	1
16	1	2	1	48750	59.172	139.591	0	0	0	0	0	1	1	1	1	1	1
17	1	2	1	48800	59.172	839.772	0	0	0	0	0	1	1	1	1	1	1
18	1	2	1	48850	59.172	810.419	0	0	0	0	0	1	1	1	1	1	1
19	1	2	1	48900	59.172	844.861	0	0	0	0	0	1	1	1	1	1	1
20	1	2	1	48950	59.172	801.459	0	0	0	0	0	1	1	1	1	1	1
21	1	2	1	49000	59.172	857.937	0	0	0	0	0	1	1	1	1	1	1
22	1	2	1	49050	59.172	856.784	0	0	0	0	0	1	1	1	1	1	1
23	1	2	1	49100	59.172	812.008	0	0	0	0	0	1	1	1	1	1	1
24	1	2	1	49150	59.172	153.49	0	0	0	0	0	1	1	1	1	1	1
25	1	2	1	49200	59.172	858.203	0	0	0	0	0	1	1	1	1	1	1
26	1	2	1	49250	59.172	798.79	0	0	0	0	0	1	1	1	1	1	1
27	1	2	1	49300	59.172	829.625	0	0	0	0	0	1	1	1	1	1	1
28	1	2	1	49350	59.172	828.062	0	0	0	0	0	1	1	1	1	1	1
29	1	2	1	49400	59.172	849.045	0	0	0	0	0	1	1	1	1	1	1
30	1	2	1	49450	59.172	815.967	0	0	0	0	0	1	1	1	1	1	1
31	1	2	1	49500	59.172	827.629	0	0	0	0	0	1	1	1	1	1	1
32	1	2	1	49550	59.172	146.901	0	0	0	0	0	1	1	1	1	1	1
33	1	2	1	49600	59.172	1120.109	0	0	0	0	0	1	1	1	1	1	1
34	1	2	1	49650	59.172	1068.426	0	0	0	0	0	1	1	1	1	1	1
35	1	2	1	49700	59.172	1165.451	0	0	0	0	0	1	1	1	1	1	1
36	1	2	1	49750	59.172	1105.271	0	0	0	0	0	1	1	1	1	1	1
37	1	2	1	49800	59.172	1137.745	0	0	0	0	0	1	1	1	1	1	1
38	1	2	1	49850	59.172	1157.091	0	0	0	0	0	1	1	1	1	1	1
39	1	2	1	49900	59.172	1096.523	0	0	0	0	0	1	1	1	1	1	1
40	1	2	1	49950	59.172	155.832	0	0	0	0	0	1	1	1	1	1	1
41	1	2	1	50000	59.172	1086.066	0	0	0	0	0	1	1	1	1	1	1
42	1	2	1	50050	59.172	1096.789	0	0	0	0	0	1	1	1	1	1	1
43	1	2	1	50100	59.172	1140.238	0	0	0	0	0	1	1	1	1	1	1
44	1	2	1	50150	59.172	1205.348	0	0	0	0	0	1	1	1	1	1	1
45	1	2	1	50200	59.172	1174.036	0	0	0	0	0	1	1	1	1	1	1
46	1	2	1	50250	59.172	1137.458	0	0	0	0	0	1	1	1	1	1	1
47	1	2	1	50300	59.172	1133.852	0	0	0	0	0	1	1	1	1	1	1
48	1	2	1	50350	59.172	152.238	0	0	0	0	0	1	1	1	1	1	1
49	1	2	1	50400	59.172	1176.477	0	0	0	0	0	1	1	1	1	1	1
50	1	2	1	50450	59.172	1213.854	0	0	0	0	0	1	1	1	1	1	1
51	1	2	1	50500	59.172	1378.694	0	0	0	0	0	1	1	1	1	1	1
52	1	2	1	50550	59.172	1315.536	0	0	0	0	0	1	1	1	1	1	1
53	1	2	1	50600	59.172	1383.491	0	0	0	0	0	1	1	1	1	1	1
54	1	2	1	50650	59.172	1309.293	0	0	0	0	0	1	1	1	1	1	1
55	1	2	1	50700	59.172	1194.378	0	0	0	0	0	1	1	1	1	1	1
56	1	2	1	50750	59.172	132.953	0	0	0	0	0	1	1	1	1	1	1
57	1	2	1	50800	59.172	1200.829	0	0	0	0	0	1	1	1	1	1	1
58	1	2	1	50850	59.172	1182.438	0	0	0	0	0	1	1	1	1	1	1
59	1	2	1	50900	59.172	1228.805	0	0	0	0	0	1	1	1	1	1	1
60	1	2	1	50950	59.172	1240.027	0	0	0	0	0	1	1	1	1	1	1
61	1	2	1	51000	59.172	1243.463	0	0	0	0	0	1	1	1	1	1	1
62	1	2	1	51050	59.172	1225.905	0	0	0	0	0	1	1	1	1	1	1
63	1	2	1	51100	59.172	1133.078	0	0	0	0	0	1	1	1	1	1	1
64	1	2	1	51150	59.172	140.899	0	0	0	0	0	1	1	1	1	1	1
65	1	2	1	51200	59.172	1346.101	0	0	0	0	0	1	1	1	1	1	1
66	1	2	1	51250	59.172	1309.343	0	0	0	0	0	1	1	1	1	1	1
67	1	2	1	51300	59.172	1388.841	0	0	0	0	0	1	1	1	1	1	1
68	1	2	1	51350	59.172	1332.793	0	0	0	0	0	1	1	1	1	1	1
69	1	2	1	51400	59.172	1408.607	0	0	0	0	0	1	1	1	1	1	1
70	1	2	1	51450	59.172	1286.05	0	0	0	0	0	1	1	1	1	1	1
71	1	2	1	51500	59.172	1273.81	0	0	0	0	0	1	1	1	1	1	1
72	1	2	1	51550	59.172	160.465	0	0	0	0	0	1	1	1	1	1	1
73	1	2	1	51600	59.172	1341.753	0	0	0	0	0	1	1	1	1	1	1
74	1	2	1	51650	59.172	1256.483	0	0	0	0	0	1	1	1	1	1	1
75	1	2	1	51700	59.172	1253.766	0	0	0	0	0	1	1	1	1	1	1
76	1	2	1	51750	59.172	1199.034	0	0	0	0	0	1	1	1	1	1	1
77	1	2	1	51800	59.172	1182.438	0	0	0	0	0	1	1	1	1	1	1
78	1	2	1	51850	59.172	1148.078	0	0	0	0	0	1	1	1	1	1	1
79	1	2	1	51900	59.172	1176.654	0	0	0	0	0	1	1	1	1	1	1
80	1	2	1	51950	59.172	146.944	0	0	0	0	0	1	1	1	1	1	1
81	1	2	1	52000	59.172	1566.152	0	0	0	0	0	1	1	1	1	1	1
82	1	2	1	52050	59.172	1405.042	0	0	0	0	0	1	1	1	1	1	1
83	1	2	1	52100	59.172	1412.719	0	0	0	0	0	1	1	1	1	1	1
84	1	2	1	52150	59.172	1361.694	0	0	0	0	0	1	1	1	1	1	1
85	1	2	1	52200	59.172	1397.162	0	0	0	0	0	1	1	1	1	1	1
86	1	2	1	52250	59.172	1358.299	0	0	0	0	0	1	1	1	1	1	1
87	1	2	1	52300	59.172	1301.577	0	0	0	0	0	1	1	1	1	1	1
88	1	2	1	52350	59.172	143.336	0	0	0	0	0	1	1	1	1	1	1
89	1	2	1	52400	59.172	1512.961	0	0	0	0	0	1	1	1	1	1	1
90	1	2	1	52450	59.172	1473.553	0	0	0	0	0	1	1	1	1	1	1
91	1	2	1	52500	59.172	1470.172	0	0	0	0	0	1	1	1	1	1	1
92	1	2	1	52550	59.172	1415.606	0	0	0	0	0	1	1	1	1	1	1
93	1	2	1	52600	59.172	1415.983	0	0	0	0	0	1	1	1	1	1	1
94	1	2	1	52650	59.172	1363.705	0	0	0	0	0	1	1	1	1	1	1
95	1	2	1	52700	59.172	1387.302	0	0	0	0	0	1	1	1	1	1	1
96	1	2	1	52750	59.172	135.063	0	0	0	0	0	1	1	1	1	1	1
1	1	2	1	52800	59.257	729.078	0	0	0	0	0	1	1	1	1	1	1
2	1	2	1	52850	59.257	718.814	0	0	0	0	0	1	1	1	1	1	1
3	1	2	1	52900	59.257	757.233	0	0	0	0	0	1	1	1	1	1	1
4	1	2	1	52950	59.257	741.393	0	0	0	0	0	1	1	1	1	1	1
5	1	2	1	53000	59.257	723.596	0	0	0	0	0	1	1	1	1	1	1
6	1	2	1	53050	59.257	732.796	0	0	0	0	0	1	1	1	1	1	1
7	1	2	1	53100	59.257	749.598	0	0	0	0	0	1	1	1	1	1	1
8	1	2	1	53150	59.257	152.856	0	0	0	0	0	1	1	1	1	1	1
9	1	2	1	53200	59.257	646.457	0	0	0	0	0	1	1	1	1	1	1
10	1	2	1	53250	59.257	605.061	0	0	0	0	0	1	1	1	1	1	1
11	1	2	1	53300	59.257	605.861	0	0	0	0	0	1	1	1	1	1	1
12	1	2	1	53350	59.257	605.117	0	0	0	0	0	1	1	1	1	1	1
13	1	2	1	53400	59.257	654.839	0	0	0	0	0	1	1	1	1	1	1
14	1	2	1	53450	59.257	646.57	0	0	0	0	0	1	1	1	1	1	1
15	1	2	1	53500	59.257	641.509	0	0	0	0	0	1	1	1	1	1	1
16	1	2	1	53550	59.257	139.34	0	0	0	0	0	1	1	1	1	1	1
17	1	2	1	53600	59.257	838.207	0	0	0	0	0	1	1	1	1	1	1
18	1	2	1	53650	59.257	808.937	0	0	0	0	0	1	1	1	1	1	1
19	1	2	1	53700	59.257	843.131	0	0	0	0	0	1	1	1	1	1	1
20	1	2	1	53750	59.257	799.543	0	0	0	0	0	1	1	1	1	1	1
21	1	2	1	53800	59.257	856.039	0	0	0	0	0	1	1	1	1	1	1
22	1	2	1	53850	59.257	855.388	0	0	0	0	0	1	1	1	1	1	1
23	1	2	1	53900	59.257	810.444	0	0	0	0	0	1	1	1	1	1	1
24	1	2	1	53950	59.257	153.083	0	0	0	0	0	1	1	1	1	1	1
25	1	2	1	54000	59.257	856.127	0	0	0	0	0	1	1	1	1	1	1
26	1	2	1	54050	59.257	797.139	0	0	0	0	0	1	1	1	1	1	1
27	1	2	1	54100	59.257	828.123	0	0	0	0	0	1	1	1	1	1	1
28	1	2	1	54150	59.257	826.505	0	0	0	0	0	1	1	1	1	1	1
29	1	2	1	54200	59.257	847.822	0	0	0	0	0	1	1	1	1	1	1
30	1	2	1	54250	59.257	814.464	0	0	0	0	0	1	1	1	1	1	1
31	1	2	1	54300	59.257	826.143	0	0	0	0	0	1	1	1	1	1	1
32	1	2	1	54350	59.257	146.564	0	0	0	0	0	1	1	1	1	1	1
33	1	2	1	54400	59.257	1117.983	0	0	0	0	0	1	1	1	1	1	1
34	1	2	1	54450	59.257	1066.259	0	0	0	0	0	1	1	1	1	1	1
35	1	2	1	54500	59.257	1163.233	0	0	0	0	0	1	1	1	1	1	1
36	1	2	1	54550	59.257	1103.225	0	0	0	0	0	1	1	1	1	1	1
37	1	2	1	54600	59.257	1135.551	0	0	0	0	0	1	1	1	1	1	1
38	1	2	1	54650	59.257	1155.175	0	0	0	0	0	1	1	1	1	1	1
39	1	2	1	54700	59.257	1094.894	0	0	0	0	0	1	1	1	1	1	1
40	1	2	1	54750	59.257	155.638	0	0	0	0	0	1	1	1	1	1	1
41	1	2	1	54800	59.257	1083.825	0	0	0	0	0	1	1	1	1	1	1
42	1	2	1	54850	59.257	1094.931	0	0	0	0	0	1	1	1	1	1	1
43	1	2	1	54900	59.257	1138.374	0	0	0	0	0	1	1	1	1	1	1
44	1	2	1	54950	59.257	1203.166	0	0	0	0	0	1	1	1	1	1	1
45	1	2	1	55000	59.257	1171.969	0	0	0	0	0	1	1	1	1	1	1
46	1	2	1	55050	59.257	1135.455	0	0	0	0	0	1	1	1	1	1	1
47	1	2	1	55100	59.257	1131.933	0	0	0	0	0	1	1	1	1	1	1
48	1	2	1	55150	59.257	151.741	0	0	0	0	0	1	1	1	1	1	1
49	1	2	1	55200	59.257	1174.665	0	0	0	0	0	1	1	1	1	1	1
50	1	2	1	55250	59.257	1211.814	0	0	0	0	0	1	1	1	1	1	1
51	1	2	1	55300	59.257	1375.841	0	0	0	0	0	1	1	1	1	1	1
52	1	2	1	55350	59.257	1313.267	0	0	0	0	0	1	1	1	1	1	1
53	1	2	1	55400	59.257	1380.961	0	0	0	0	0	1	1	1	1	1	1
54	1	2	1	55450	59.257	1306.869	0	0	0	0	0	1	1	1	1	1	1
55	1	2	1	55500	59.257	1192.787	0	0	0	0	0	1	1	1	1	1	1
56	1	2	1	55550	59.257	132.781	0	0	0	0	0	1	1	1	1	1	1
57	1	2	1	55600	59.257	1198.828	0	0	0	0	0	1	1	1	1	1	1
58	1	2	1	55650	59.257	1180.638	0	0	0	0	0	1	1	1	1	1	1
59	1	2	1	55700	59.257	1226.25	0	0	0	0	0	1	1	1	1	1	1
60	1	2	1	55750	59.257	1237.305	0	0	0	0	0	1	1	1	1	1	1
61	1	2	1	55800	59.257	1241.57	0	0	0	0	0	1	1	1	1	1	1
62	1	2	1	55850	59.257	1223.754	0	0	0	0	0	1	1	1	1	1	1
63	1	2	1	55900	59.257	1131.796	0	0	0	0	0	1	1	1	1	1	1
64	1	2	1	55950	59.257	140.513	0	0	0	0	0	1	1	1	1	1	1
65	1	2	1	56000	59.257	1343.748	0	0	0	0	0	1	1	1	1	1	1
66	1	2	1	56050	59.257	1307.471	0	0	0	0	0	1	1	1	1	1	1
67	1	2	1	56100	59.257	1386.473	0	0	0	0	0	1	1	1	1	1	1
68	1	2	1	56150	59.257	1330.475	0	0	0	0	0	1	1	1	1	1	1
69	1	2	1	56200	59.257	1406.654	0	0	0	0	0	1	1	1	1	1	1
70	1	2	1	56250	59.257	1283.44	0	0	0	0	0	1	1	1	1	1	1
71	1	2	1	56300	59.257	1271.994	0	0	0	0	0	1	1	1	1	1	1
72	1	2	1	56350	59.257	159.953	0	0	0	0	0	1	1	1	1	1	1
73	1	2	1	56400	59.257	1339.59	0	0	0	0	0	1	1	1	1	1	1
74	1	2	1	56450	59.257	1254.912	0	0	0	0	0	1	1	1	1	1	1
75	1	2	1	56500	59.257	1251.788	0	0	0	0	0	1	1	1	1	1	1
76	1	2	1	56550	59.257	1196.952	0	0	0	0	0	1	1	1	1	1	1
77	1	2	1	56600	59.257	1180.401	0	0	0	0	0	1	1	1	1	1	1
78	1	2	1	56650	59.257	1145.999	0	0	0	0	0	1	1	1	1	1	1
79	1	2	1	56700	59.257	1175.251	0	0	0	0	0	1	1	1	1	1	1
80	1	2	1	56750	59.257	146.546	0	0	0	0	0	1	1	1	1	1	1
81	1	2	1	56800	59.257	1563.902	0	0	0	0	0	1	1	1	1	1	1
82	1	2	1	56850	59.257	1403.274	0	0	0	0	0	1	1	1	1	1	1
83	1	2	1	56900	59.257	1410.903	0	0	0	0	0	1	1	1	1	1	1
84	1	2	1	56950	59.257	1360.035	0	0	0	0	0	1	1	1	1	1	1
85	1	2	1	57000	59.257	1395.542	0	0	0	0	0	1	1	1	1	1	1
86	1	2	1	57050	59.257	1356.349	0	0	0	0	0	1	1	1	1	1	1
87	1	2	1	57100	59.257	1299.941	0	0	0	0	0	1	1	1	1	1	1
88	1	2	1	57150	59.257	142.811	0	0	0	0	0	1	1	1	1	1	1
89	1	2	1	57200	59.257	1510.444	0	0	0	0	0	1	1	1	1	1	1
90	1	2	1	57250	59.257	1471.377	0	0	0	0	0	1	1	1	1	1	1
91	1	2	1	57300	59.257	1467.559	0	0	0	0	0	1	1	1	1	1	1
92	1	2	1	57350	59.257	1413.743	0	0	0	0	0	1	1	1	1	1	1
93	1	2	1	57400	59.257	1414.155	0	0	0	0	0	1	1	1	1	1	1
94	1	2	1	57450	59.257	1361.616	0	0	0	0	0	1	1	1	1	1	1
95	1	2	1	57500	59.257	1385.179	0	0	0	0	0	1	1	1	1	1	1
96	1	2	1	57550	59.257	134.829	0	0	0	0	0	1	1	1	1	1	1
1	1	2	1	57600	59.344	727.379	0	0	0	0	0	1	1	1	1	1	1
2	1	2	1	57650	59.344	717.099	0	0	0	0	0	1	1	1	1	1	1
3	1	2	1	57700	59.344	755.47	0	0	0	0	0	1	1	1	1	1	1
4	1	2	1	57750	59.344	739.833	0	0	0	0	0	1	1	1	1	1	1
5	1	2	1	57800	59.344	721.986	0	0	0	0	0	1	1	1	1	1	1
6	1	2	1	57850	59.344	731.229	0	0	0	0	0	1	1	1	1	1	1
7	1	2	1	57900	59.344	747.828	0	0	0	0	0	1	1	1	1	1	1
8	1	2	1	57950	59.344	152.495	0	0	0	0	0	1	1	1	1	1	1
9	1	2	1	58000	59.344	644.929	0	0	0	0	0	1	1	1	1	1	1
10	1	2	1	58050	59.344	603.788	0	0	0	0	0	1	1	1	1	1	1
11	1	2	1	58100	59.344	604.26	0	0	0	0	0	1	1	1	1	1	1
12	1	2	1	58150	59.344	603.703	0	0	0	0	0	1	1	1	1	1	1
13	1	2	1	58200	59.344	653.282	0	0	0	0	0	1	1	1	1	1	1
14	1	2	1	58250	59.344	645.151	0	0	0	0	0	1	1	1	1	1	1
15	1	2	1	58300	59.344	640.31	0	0	0	0	0	1	1	1	1	1	1
16	1	2	1	58350	59.344	138.85	0	0	0	0	0	1	1	1	1	1	1
17	1	2	1	58400	59.344	836.465	0	0	0	0	0	1	1	1	1	1	1
18	1	2	1	58450	59.344	807.34	0	0	0	0	0	1	1	1	1	1	1
19	1	2	1	58500	59.344	841.41	0	0	0	0	0	1	1	1	1	1	1
20	1	2	1	58550	59.344	798.097	0	0	0	0	0	1	1	1	1	1	1
21	1	2	1	58600	59.344	854.188	0	0	0	0	0	1	1	1	1	1	1
22	1	2	1	58650	59.344	853.686	0	0	0	0	0	1	1	1	1	1	1
23	1	2	1	58700	59.344	809.036	0	0	0	0	0	1	1	1	1	1	1
24	1	2	1	58750	59.344	152.497	0	0	0	0	0	1	1	1	1	1	1
25	1	2	1	58800	59.344	854.286	0	0	0	0	0	1	1	1	1	1	1
26	1	2	1	58850	59.344	795.535	0	0	0	0	0	1	1	1	1	1	1
27	1	2	1	58900	59.344	826.333	0	0	0	0	0	1	1	1	1	1	1
28	1	2	1	58950	59.344	824.877	0	0	0	0	0	1	1	1	1	1	1
29	1	2	1	59000	59.344	845.871	0	0	0	0	0	1	1	1	1	1	1
30	1	2	1	59050	59.344	813.239	0	0	0	0	0	1	1	1	1	1	1
31	1	2	1	59100	59.344	824.476	0	0	0	0	0	1	1	1	1	1	1
32	1	2	1	59150	59.344	146.057	0	0	0	0	0	1	1	1	1	1	1
33	1	2	1	59200	59.344	1115.768	0	0	0	0	0	1	1	1	1	1	1
34	1	2	1	59250	59.344	1064.734	0	0	0	0	0	1	1	1	1	1	1
35	1	2	1	59300	59.344	1161.115	0	0	0	0	0	1	1	1	1	1	1
36	1	2	1	59350	59.344	1101.329	0	0	0	0	0	1	1	1	1	1	1
37	1	2	1	59400	59.344	1133.438	0	0	0	0	0	1	1	1	1	1	1
38	1	2	1	59450	59.344	1153.034	0	0	0	0	0	1	1	1	1	1	1
39	1	2	1	59500	59.344	1092.996	0	0	0	0	0	1	1	1	1	1	1
40	1	2	1	59550	59.344	155.099	0	0	0	0	0	1	1	1	1	1	1
41	1	2	1	59600	59.344	1081.757	0	0	0	0	0	1	1	1	1	1	1
42	1	2	1	59650	59.344	1092.81	0	0	0	0	0	1	1	1	1	1	1
43	1	2	1	59700	59.344	1136.032	0	0	0	0	0	1	1	1	1	1	1
44	1	2	1	59750	59.344	1200.982	0	0	0	0	0	1	1	1	1	1	1
45	1	2	1	59800	59.344	1169.633	0	0	0	0	0	1	1	1	1	1	1
46	1	2	1	59850	59.344	1133.71	0	0	0	0	0	1	1	1	1	1	1
47	1	2	1	59900	59.344	1129.771	0	0	0	0	0	1	1	1	1	1	1
48	1	2	1	59950	59.344	151.355	0	0	0	0	0	1	1	1	1	1	1
49	1	2	1	60000	59.344	1172.451	0	0	0	0	0	1	1	1	1	1	1
50	1	2	1	60050	59.344	1209.595	0	0	0	0	0	1	1	1	1	1	1
51	1	2	1	60100	59.344	1373.314	0	0	0	0	0	1	1	1	1	1	1
52	1	2	1	60150	59.344	1311.137	0	0	0	0	0	1	1	1	1	1	1
53	1	2	1	60200	59.344	1378.98	0	0	0	0	0	1	1	1	1	1	1
54	1	2	1	60250	59.344	1304.7	0	0	0	0	0	1	1	1	1	1	1
55	1	2	1	60300	59.344	1190.754	0	0	0	0	0	1	1	1	1	1	1
56	1	2	1	60350	59.344	132.507	0	0	0	0	0	1	1	1	1	1	1
57	1	2	1	60400	59.344	1196.58	0	0	0	0	0	1	1	1	1	1	1
58	1	2	1	60450	59.344	1178.452	0	0	0	0	0	1	1	1	1	1	1
59	1	2	1	60500	59.344	1224.34	0	0	0	0	0	1	1	1	1	1	1
60	1	2	1	60550	59.344	1235.53	0	0	0	0	0	1	1	1	1	1	1
61	1	2	1	60600	59.344	1239.227	0	0	0	0	0	1	1	1	1	1	1
62	1	2	1	60650	59.344	1221.863	0	0	0	0	0	1	1	1	1	1	1
63	1	2	1	60700	59.344	1129.601	0	0	0	0	0	1	1	1	1	1	1
64	1	2	1	60750	59.344	140.189	0	0	0	0	0	1	1	1	1	1	1
65	1	2	1	60800	59.344	1341.698	0	0	0	0	0	1	1	1	1	1	1
66	1	2	1	60850	59.344	1305.621	0	0	0	0	0	1	1	1	1	1	1
67	1	2	1	60900	59.344	1384.138	0	0	0	0	0	1	1	1	1	1	1
68	1	2	1	60950	59.344	1328.247	0	0	0	0	0	1	1	1	1	1	1
69	1	2	1	61000	59.344	1404.199	0	0	0	0	0	1	1	1	1	1	1
70	1	2	1	61050	59.344	1281.328	0	0	0	0	0	1	1	1	1	1	1
71	1	2	1	61100	59.344	1270.01	0	0	0	0	0	1	1	1	1	1	1
72	1	2	1	61150	59.344	159.394	0	0	0	0	0	1	1	1	1	1	1
73	1	2	1	61200	59.344	1337.304	0	0	0	0	0	1	1	1	1	1	1
74	1	2	1	61250	59.344	1253.356	0	0	0	0	0	1	1	1	1	1	1
75	1	2	1	61300	59.344	1249.834	0	0	0	0	0	1	1	1	1	1	1
76	1	2	1	61350	59.344	1194.727	0	0	0	0	0	1	1	1	1	1	1
77	1	2	1	61400	59.344	1178.016	0	0	0	0	0	1	1	1	1	1	1
78	1	2	1	61450	59.344	1144.405	0	0	0	0	0	1	1	1	1	1	1
79	1	2	1	61500	59.344	1173.516	0	0	0	0	0	1	1	1	1	1	1
80	1	2	1	61550	59.344	145.963	0	0	0	0	0	1	1	1	1	1	1
81	1	2	1	61600	59.344	1561.257	0	0	0	0	0	1	1	1	1	1	1
82	1	2	1	61650	59.344	1401.562	0	0	0	0	0	1	1	1	1	1	1
83	1	2	1	61700	59.344	1408.905	0	0	0	0	0	1	1	1	1	1	1
84	1	2	1	61750	59.344	1358.692	0	0	0	0	0	1	1	1	1	1	1
85	1	2	1	61800	59.344	1393.535	0	0	0	0	0	1	1	1	1	1	1
86	1	2	1	61850	59.344	1354.797	0	0	0	0	0	1	1	1	1	1	1
87	1	2	1	61900	59.344	1298.251	0	0	0	0	0	1	1	1	1	1	1
88	1	2	1	61950	59.344	142.483	0	0	0	0	0	1	1	1	1	1	1
89	1	2	1	62000	59.344	1507.941	0	0	0	0	0	1	1	1	1	1	1
90	1	2	1	62050	59.344	1469.125	0	0	0	0	0	1	1	1	1	1	1
91	1	2	1	62100	59.344	1465.438	0	0	0	0	0	1	1	1	1	1	1
92	1	2	1	62150	59.344	1411.556	0	0	0	0	0	1	1	1	1	1	1
93	1	2	1	62200	59.344	1412.015	0	0	0	0	0	1	1	1	1	1	1
94	1	2	1	62250	59.344	1359.811	0	0	0	0	0	1	1	1	1	1	1
95	1	2	1	62300	59.344	1383.313	0	0	0	0	0	1	1	1	1	1	1
96	1	2	1	62350	59.344	134.375	0	0	0	0	0	1	1	1	1	1	1
1	1	2	1	62400	59.434	725.73	0	0	0	0	0	1	1	1	1	1	1
2	1	2	1	62450	59.434	715.771	0	0	0	0	0	1	1	1	1	1	1
3	1	2	1	62500	59.434	753.992	0	0	0	0	0	1	1	1	1	1	1
4	1	2	1	62550	59.434	738.312	0	0	0	0	0	1	1	1	1	1	1
5	1	2	1	62600	59.434	720.387	0	0	0	0	0	1	1	1	1	1	1
6	1	2	1	62650	59.434	729.73	0	0	0	0	0	1	1	1	1	1	1
7	1	2	1	62700	59.434	746.422	0	0	0	0	0	1	1	1	1	1	1
8	1	2	1	62750	59.434	151.835	0	0	0	0	0	1	1	1	1	1	1
9	1	2	1	62800	59.434	643.678	0	0	0	0	0	1	1	1	1	1	1
10	1	2	1	62850	59.434	602.504	0	0	0	0	0	1	1	1	1	1	1
11	1	2	1	62900	59.434	603.131	0	0	0	0	0	1	1	1	1	1	1
12	1	2	1	62950	59.434	602.473	0	0	0	0	0	1	1	1	1	1	1
13	1	2	1	63000	59.434	651.82	0	0	0	0	0	1	1	1	1	1	1
14	1	2	1	63050	59.434	643.908	0	0	0	0	0	1	1	1	1	1	1
15	1	2	1	63100	59.434	638.962	0	0	0	0	0	1	1	1	1	1	1
16	1	2	1	63150	59.434	138.537	0	0	0	0	0	1	1	1	1	1	1
17	1	2	1	63200	59.434	834.927	0	0	0	0	0	1	1	1	1	1	1
18	1	2	1	63250	59.434	805.868	0	0	0	0	0	1	1	1	1	1	1
19	1	2	1	63300	59.434	839.732	0	0	0	0	0	1	1	1	1	1	1
20	1	2	1	63350	59.434	796.217	0	0	0	0	0	1	1	1	1	1	1
21	1	2	1	63400	59.434	852.584	0	0	0	0	0	1	1	1	1	1	1
22	1	2	1	63450	59.434	851.785	0	0	0	0	0	1	1	1	1	1	1
23	1	2	1	63500	59.434	807.298	0	0	0	0	0	1	1	1	1	1	1
24	1	2	1	63550	59.434	151.754	0	0	0	0	0	1	1	1	1	1	1
25	1	2	1	63600	59.434	852.896	0	0	0	0	0	1	1	1	1	1	1
26	1	2	1	63650	59.434	793.873	0	0	0	0	0	1	1	1	1	1	1
27	1	2	1	63700	59.434	824.721	0	0	0	0	0	1	1	1	1	1	1
28	1	2	1	63750	59.434	823.16	0	0	0	0	0	1	1	1	1	1	1
29	1	2	1	63800	59.434	844.244	0	0	0	0	0	1	1	1	1	1	1
30	1	2	1	63850	59.434	811.248	0	0	0	0	0	1	1	1	1	1	1
31	1	2	1	63900	59.434	822.942	0	0	0	0	0	1	1	1	1	1	1
32	1	2	1	63950	59.434	145.446	0	0	0	0	0	1	1	1	1	1	1
33	1	2	1	64000	59.434	1113.684	0	0	0	0	0	1	1	1	1	1	1
34	1	2	1	64050	59.434	1063.014	0	0	0	0	0	1	1	1	1	1	1
35	1	2	1	64100	59.434	1158.844	0	0	0	0	0	1	1	1	1	1	1
36	1	2	1	64150	59.434	1098.993	0	0	0	0	0	1	1	1	1	1	1
37	1	2	1	64200	59.434	1131.625	0	0	0	0	0	1	1	1	1	1	1
38	1	2	1	64250	59.434	1151.026	0	0	0	0	0	1	1	1	1	1	1
39	1	2	1	64300	59.434	1090.979	0	0	0	0	0	1	1	1	1	1	1
40	1	2	1	64350	59.434	154.578	0	0	0	0	0	1	1	1	1	1	1
41	1	2	1	64400	59.434	1080.008	0	0	0	0	0	1	1	1	1	1	1
42	1	2	1	64450	59.434	1091.009	0	0	0	0	0	1	1	1	1	1	1
43	1	2	1	64500	59.434	1134.06	0	0	0	0	0	1	1	1	1	1	1
44	1	2	1	64550	59.434	1198.574	0	0	0	0	0	1	1	1	1	1	1
45	1	2	1	64600	59.434	1167.682	0	0	0	0	0	1	1	1	1	1	1
46	1	2	1	64650	59.434	1131.521	0	0	0	0	0	1	1	1	1	1	1
47	1	2	1	64700	59.434	1128.105	0	0	0	0	0	1	1	1	1	1	1
48	1	2	1	64750	59.434	150.773	0	0	0	0	0	1	1	1	1	1	1
49	1	2	1	64800	59.434	1170.644	0	0	0	0	0	1	1	1	1	1	1
50	1	2	1	64850	59.434	1207.591	0	0	0	0	0	1	1	1	1	1	1
51	1	2	1	64900	59.434	1371.149	0	0	0	0	0	1	1	1	1	1	1
52	1	2	1	64950	59.434	1308.879	0	0	0	0	0	1	1	1	1	1	1
53	1	2	1	65000	59.434	1376.545	0	0	0	0	0	1	1	1	1	1	1
54	1	2	1	65050	59.434	1302.345	0	0	0	0	0	1	1	1	1	1	1
55	1	2	1	65100	59.434	1188.889	0	0	0	0	0	1	1	1	1	1	1
56	1	2	1	65150	59.434	131.879	0	0	0	0	0	1	1	1	1	1	1
57	1	2	1	65200	59.434	1194.722	0	0	0	0	0	1	1	1	1	1	1
58	1	2	1	65250	59.434	1176.435	0	0	0	0	0	1	1	1	1	1	1
59	1	2	1	65300	59.434	1222.29	0	0	0	0	0	1	1	1	1	1	1
60	1	2	1	65350	59.434	1233.437	0	0	0	0	0	1	1	1	1	1	1
61	1	2	1	65400	59.434	1236.939	0	0	0	0	0	1	1	1	1	1	1
62	1	2	1	65450	59.434	1219.727	0	0	0	0	0	1	1	1	1	1	1
63	1	2	1	65500	59.434	1127.859	0	0	0	0	0	1	1	1	1	1	1
64	1	2	1	65550	59.434	139.581	0	0	0	0	0	1	1	1	1	1	1
65	1	2	1	65600	59.434	1339.485	0	0	0	0	0	1	1	1	1	1	1
66	1	2	1	65650	59.434	1303.541	0	0	0	0	0	1	1	1	1	1	1
67	1	2	1	65700	59.434	1381.787	0	0	0	0	0	1	1	1	1	1	1
68	1	2	1	65750	59.434	1326.02	0	0	0	0	0	1	1	1	1	1	1
69	1	2	1	65800	59.434	1401.83	0	0	0	0	0	1	1	1	1	1	1
70	1	2	1	65850	59.434	1279.298	0	0	0	0	0	1	1	1	1	1	1
71	1	2	1	65900	59.434	1268.155	0	0	0	0	0	1	1	1	1	1	1
72	1	2	1	65950	59.434	158.72	0	0	0	0	0	1	1	1	1	1	1
73	1	2	1	66000	59.434	1334.928	0	0	0	0	0	1	1	1	1	1	1
74	1	2	1	66050	59.434	1251.523	0	0	0	0	0	1	1	1	1	1	1
75	1	2	1	66100	59.434	1248.013	0	0	0	0	0	1	1	1	1	1	1
76	1	2	1	66150	59.434	1192.608	0	0	0	0	0	1	1	1	1	1	1
77	1	2	1	66200	59.434	1176.377	0	0	0	0	0	1	1	1	1	1	1
78	1	2	1	66250	59.434	1142.277	0	0	0	0	0	1	1	1	1	1	1
79	1	2	1	66300	59.434	1171.787	0	0	0	0	0	1	1	1	1	1	1
80	1	2	1	66350	59.434	145.343	0	0	0	0	0	1	1	1	1	1	1
81	1	2	1	66400	59.434	1559.105	0	0	0	0	0	1	1	1	1	1	1
82	1	2	1	66450	59.434	1399.7	0	0	0	0	0	1	1	1	1	1	1
83	1	2	1	66500	59.434	1407.161	0	0	0	0	0	1	1	1	1	1	1
84	1	2	1	66550	59.434	1357.168	0	0	0	0	0	1	1	1	1	1	1
85	1	2	1	66600	59.434	1391.694	0	0	0	0	0	1	1	1	1	1	1
86	1	2	1	66650	59.434	1352.683	0	0	0	0	0	1	1	1	1	1	1
87	1	2	1	66700	59.434	1296.654	0	0	0	0	0	1	1	1	1	1	1
88	1	2	1	66750	59.434	141.963	0	0	0	0	0	1	1	1	1	1	1
89	1	2	1	66800	59.434	1505.991	0	0	0	0	0	1	1	1	1	1	1
90	1	2	1	66850	59.434	1466.894	0	0	0	0	0	1	1	1	1	1	1
91	1	2	1	66900	59.434	1463.29	0	0	0	0	0	1	1	1	1	1	1
92	1	2	1	66950	59.434	1409.598	0	0	0	0	0	1	1	1	1	1	1
93	1	2	1	67000	59.434	1410.016	0	0	0	0	0	1	1	1	1	1	1
94	1	2	1	67050	59.434	1357.73	0	0	0	0	0	1	1	1	1	1	1
95	1	2	1	67100	59.434	1381.306	0	0	0	0	0	1	1	1	1	1	1
96	1	2	1	67150	59.434	133.884	0	0	0	0	0	1	1	1	1	1	1
1	1	2	1	67200	59.533	724.133	0	0	0	0	0	1	1	1	1	1	1
2	1	2	1	67250	59.533	714.192	0	0	0	0	0	1	1	1	1	1	1
3	1	2	1	67300	59.533	752.385	0	0	0	0	0	1	1	1	1	1	1
4	1	2	1	67350	59.533	736.823	0	0	0	0	0	1	1	1	1	1	1
5	1	2	1	67400	59.533	718.965	0	0	0	0	0	1	1	1	1	1	1
6	1	2	1	67450	59.533	728.008	0	0	0	0	0	1	1	1	1	1	1
7	1	2	1	67500	59.533	744.638	0	0	0	0	0	1	1	1	1	1	1
8	1	2	1	67550	59.533	151.565	0	0	0	0	0	1	1	1	1	1	1
9	1	2	1	67600	59.533	642.007	0	0	0	0	0	1	1	1	1	1	1
10	1	2	1	67650	59.533	601.251	0	0	0	0	0	1	1	1	1	1	1
11	1	2	1	67700	59.533	601.8	0	0	0	0	0	1	1	1	1	1	1
12	1	2	1	67750	59.533	601.141	0	0	0	0	0	1	1	1	1	1	1
13	1	2	1	67800	59.533	650.283	0	0	0	0	0	1	1	1	1	1	1
14	1	2	1	67850	59.533	642.566	0	0	0	0	0	1	1	1	1	1	1
15	1	2	1	67900	59.533	637.885	0	0	0	0	0	1	1	1	1	1	1
16	1	2	1	67950	59.533	138.142	0	0	0	0	0	1	1	1	1	1	1
17	1	2	1	68000	59.533	832.728	0	0	0	0	0	1	1	1	1	1	1
18	1	2	1	68050	59.533	803.814	0	0	0	0	0	1	1	1	1	1	1
19	1	2	1	68100	59.533	837.904	0	0	0	0	0	1	1	1	1	1	1
20	1	2	1	68150	59.533	794.492	0	0	0	0	0	1	1	1	1	1	1
21	1	2	1	68200	59.533	850.99	0	0	0	0	0	1	1	1	1	1	1
22	1	2	1	68250	59.533	849.931	0	0	0	0	0	1	1	1	1	1	1
23	1	2	1	68300	59.533	805.892	0	0	0	0	0	1	1	1	1	1	1
24	1	2	1	68350	59.533	151.477	0	0	0	0	0	1	1	1	1	1	1
25	1	2	1	68400	59.533	850.88	0	0	0	0	0	1	1	1	1	1	1
26	1	2	1	68450	59.533	792.091	0	0	0	0	0	1	1	1	1	1	1
27	1	2	1	68500	59.533	822.912	0	0	0	0	0	1	1	1	1	1	1
28	1	2	1	68550	59.533	821.328	0	0	0	0	0	1	1	1	1	1	1
29	1	2	1	68600	59.533	842.333	0	0	0	0	0	1	1	1	1	1	1
30	1	2	1	68650	59.533	809.495	0	0	0	0	0	1	1	1	1	1	1
31	1	2	1	68700	59.533	821.257	0	0	0	0	0	1	1	1	1	1	1
32	1	2	1	68750	59.533	145.012	0	0	0	0	0	1	1	1	1	1	1
33	1	2	1	68800	59.533	1111.496	0	0	0	0	0	1	1	1	1	1	1
34	1	2	1	68850	59.533	1060.997	0	0	0	0	0	1	1	1	1	1	1
35	1	2	1	68900	59.533	1156.794	0	0	0	0	0	1	1	1	1	1	1
36	1	2	1	68950	59.533	1097.236	0	0	0	0	0	1	1	1	1	1	1
37	1	2	1	69000	59.533	1129.377	0	0	0	0	0	1	1	1	1	1	1
38	1	2	1	69050	59.533	1148.496	0	0	0	0	0	1	1	1	1	1	1
39	1	2	1	69100	59.533	1088.895	0	0	0	0	0	1	1	1	1	1	1
40	1	2	1	69150	59.533	154.212	0	0	0	0	0	1	1	1	1	1	1
41	1	2	1	69200	59.533	1077.674	0	0	0	0	0	1	1	1	1	1	1
42	1	2	1	69250	59.533	1089.034	0	0	0	0	0	1	1	1	1	1	1
43	1	2	1	69300	59.533	1131.825	0	0	0	0	0	1	1	1	1	1	1
44	1	2	1	69350	59.533	1196.331	0	0	0	0	0	1	1	1	1	1	1
45	1	2	1	69400	59.533	1165.34	0	0	0	0	0	1	1	1	1	1	1
46	1	2	1	69450	59.533	1129.472	0	0	0	0	0	1	1	1	1	1	1
47	1	2	1	69500	59.533	1126.183	0	0	0	0	0	1	1	1	1	1	1
48	1	2	1	69550	59.533	150.462	0	0	0	0	0	1	1	1	1	1	1
49	1	2	1	69600	59.533	1168.352	0	0	0	0	0	1	1	1	1	1	1
50	1	2	1	69650	59.533	1205.628	0	0	0	0	0	1	1	1	1	1	1
51	1	2	1	69700	59.533	1368.432	0	0	0	0	0	1	1	1	1	1	1
52	1	2	1	69750	59.533	1306.132	0	0	0	0	0	1	1	1	1	1	1
53	1	2	1	69800	59.533	1373.638	0	0	0	0	0	1	1	1	1	1	1
54	1	2	1	69850	59.533	1299.948	0	0	0	0	0	1	1	1	1	1	1
55	1	2	1	69900	59.533	1187.082	0	0	0	0	0	1	1	1	1	1	1
56	1	2	1	69950	59.533	131.594	0	0	0	0	0	1	1	1	1	1	1
57	1	2	1	70000	59.533	1192.384	0	0	0	0	0	1	1	1	1	1	1
58	1	2	1	70050	59.533	1174.583	0	0	0	0	0	1	1	1	1	1	1
59	1	2	1	70100	59.533	1220.304	0	0	0	0	0	1	1	1	1	1	1
60	1	2	1	70150	59.533	1231.029	0	0	0	0	0	1	1	1	1	1	1
61	1	2	1	70200	59.533	1234.752	0	0	0	0	0	1	1	1	1	1	1
62	1	2	1	70250	59.533	1217.324	0	0	0	0	0	1	1	1	1	1	1
63	1	2	1	70300	59.533	1125.613	0	0	0	0	0	1	1	1	1	1	1
64	1	2	1	70350	59.533	139.109	0	0	0	0	0	1	1	1	1	1	1
65	1	2	1	70400	59.533	1337.123	0	0	0	0	0	1	1	1	1	1	1
66	1	2	1	70450	59.533	1301.566	0	0	0	0	0	1	1	1	1	1	1
67	1	2	1	70500	59.533	1379.786	0	0	0	0	0	1	1	1	1	1	1
68	1	2	1	70550	59.533	1323.587	0	0	0	0	0	1	1	1	1	1	1
69	1	2	1	70600	59.533	1399.555	0	0	0	0	0	1	1	1	1	1	1
70	1	2	1	70650	59.533	1276.791	0	0	0	0	0	1	1	1	1	1	1
71	1	2	1	70700	59.533	1266.155	0	0	0	0	0	1	1	1	1	1	1
72	1	2	1	70750	59.533	158.148	0	0	0	0	0	1	1	1	1	1	1
73	1	2	1	70800	59.533	1332.607	0	0	0	0	0	1	1	1	1	1	1
74	1	2	1	70850	59.533	1249.952	0	0	0	0	0	1	1	1	1	1	1
75	1	2	1	70900	59.533	1246.029	0	0	0	0	0	1	1	1	1	1	1
76	1	2	1	70950	59.533	1190.154	0	0	0	0	0	1	1	1	1	1	1
77	1	2	1	71000	59.533	1174.231	0	0	0	0	0	1	1	1	1	1	1
78	1	2	1	71050	59.533	1140.317	0	0	0	0	0	1	1	1	1	1	1
79	1	2	1	71100	59.533	1170.118	0	0	0	0	0	1	1	1	1	1	1
80	1	2	1	71150	59.533	144.887	0	0	0	0	0	1	1	1	1	1	1
81	1	2	1	71200	59.533	1556.355	0	0	0	0	0	1	1	1	1	1	1
82	1	2	1	71250	59.533	1398.544	0	0	0	0	0	1	1	1	1	1	1
83	1	2	1	71300	59.533	1405.271	0	0	0	0	0	1	1	1	1	1	1
84	1	2	1	71350	59.533	1354.684	0	0	0	0	0	1	1	1	1	1	1
85	1	2	1	71400	59.533	1389.432	0	0	0	0	0	1	1	1	1	1	1
86	1	2	1	71450	59.533	1350.457	0	0	0	0	0	1	1	1	1	1	1
87	1	2	1	71500	59.533	1295.001	0	0	0	0	0	1	1	1	1	1	1
88	1	2	1	71550	59.533	141.508	0	0	0	0	0	1	1	1	1	1	1
89	1	2	1	71600	59.533	1503.684	0	0	0	0	0	1	1	1	1	1	1
90	1	2	1	71650	59.533	1464.353	0	0	0	0	0	1	1	1	1	1	1
91	1	2	1	71700	59.533	1460.626	0	0	0	0	0	1	1	1	1	1	1
92	1	2	1	71750	59.533	1407.246	0	0	0	0	0	1	1	1	1	1	1
93	1	2	1	71800	59.533	1407.633	0	0	0	0	0	1	1	1	1	1	1
94	1	2	1	71850	59.533	1355.628	0	0	0	0	0	1	1	1	1	1	1
95	1	2	1	71900	59.533	1379.19	0	0	0	0	0	1	1	1	1	1	1
96	1	2	1	71950	59.533	133.523	0	0	0	0	0	1	1	1	1	1	1
1	1	2	1	72000	59.628	722.336	0	0	0	0	0	1	1	1	1	1	1
2	1	2	1	72050	59.628	712.282	0	0	0	0	0	1	1	1	1	1	1
3	1	2	1	72100	59.628	750.629	0	0	0	0	0	1	1	1	1	1	1
4	1	2	1	72150	59.628	735.147	0	0	0	0	0	1	1	1	1	1	1
5	1	2	1	72200	59.628	717.252	0	0	0	0	0	1	1	1	1	1	1
6	1	2	1	72250	59.628	726.291	0	0	0	0	0	1	1	1	1	1	1
7	1	2	1	72300	59.628	742.906	0	0	0	0	0	1	1	1	1	1	1
8	1	2	1	72350	59.628	151.159	0	0	0	0	0	1	1	1	1	1	1
9	1	2	1	72400	59.628	640.588	0	0	0	0	0	1	1	1	1	1	1
10	1	2	1	72450	59.628	599.943	0	0	0	0	0	1	1	1	1	1	1
11	1	2	1	72500	59.628	600.444	0	0	0	0	0	1	1	1	1	1	1
12	1	2	1	72550	59.628	599.51	0	0	0	0	0	1	1	1	1	1	1
13	1	2	1	72600	59.628	648.806	0	0	0	0	0	1	1	1	1	1	1
14	1	2	1	72650	59.628	641.036	0	0	0	0	0	1	1	1	1	1	1
15	1	2	1	72700	59.628	636.491	0	0	0	0	0	1	1	1	1	1	1
16	1	2	1	72750	59.628	137.832	0	0	0	0	0	1	1	1	1	1	1
17	1	2	1	72800	59.628	830.936	0	0	0	0	0	1	1	1	1	1	1
18	1	2	1	72850	59.628	802.224	0	0	0	0	0	1	1	1	1	1	1
19	1	2	1	72900	59.628	835.99	0	0	0	0	0	1	1	1	1	1	1
20	1	2	1	72950	59.628	792.845	0	0	0	0	0	1	1	1	1	1	1
21	1	2	1	73000	59.628	848.885	0	0	0	0	0	1	1	1	1	1	1
22	1	2	1	73050	59.628	847.949	0	0	0	0	0	1	1	1	1	1	1
23	1	2	1	73100	59.628	804.138	0	0	0	0	0	1	1	1	1	1	1
24	1	2	1	73150	59.628	150.903	0	0	0	0	0	1	1	1	1	1	1
25	1	2	1	73200	59.628	848.921	0	0	0	0	0	1	1	1	1	1	1
26	1	2	1	73250	59.628	790.166	0	0	0	0	0	1	1	1	1	1	1
27	1	2	1	73300	59.628	821.025	0	0	0	0	0	1	1	1	1	1	1
28	1	2	1	73350	59.628	819.521	0	0	0	0	0	1	1	1	1	1	1
29	1	2	1	73400	59.628	840.69	0	0	0	0	0	1	1	1	1	1	1
30	1	2	1	73450	59.628	807.706	0	0	0	0	0	1	1	1	1	1	1
31	1	2	1	73500	59.628	819.532	0	0	0	0	0	1	1	1	1	1	1
32	1	2	1	73550	59.628	144.585	0	0	0	0	0	1	1	1	1	1	1
33	1	2	1	73600	59.628	1109.276	0	0	0	0	0	1	1	1	1	1	1
34	1	2	1	73650	59.628	1059.027	0	0	0	0	0	1	1	1	1	1	1
35	1	2	1	73700	59.628	1154.167	0	0	0	0	0	1	1	1	1	1	1
36	1	2	1	73750	59.628	1094.799	0	0	0	0	0	1	1	1	1	1	1
37	1	2	1	73800	59.628	1126.949	0	0	0	0	0	1	1	1	1	1	1
38	1	2	1	73850	59.628	1146.561	0	0	0	0	0	1	1	1	1	1	1
39	1	2	1	73900	59.628	1087.036	0	0	0	0	0	1	1	1	1	1	1
40	1	2	1	73950	59.628	153.806	0	0	0	0	0	1	1	1	1	1	1
41	1	2	1	74000	59.628	1075.386	0	0	0	0	0	1	1	1	1	1	1
42	1	2	1	74050	59.628	1086.935	0	0	0	0	0	1	1	1	1	1	1
43	1	2	1	74100	59.628	1129.725	0	0	0	0	0	1	1	1	1	1	1
44	1	2	1	74150	59.628	1193.94	0	0	0	0	0	1	1	1	1	1	1
45	1	2	1	74200	59.628	1162.917	0	0	0	0	0	1	1	1	1	1	1
46	1	2	1	74250	59.628	1126.796	0	0	0	0	0	1	1	1	1	1	1
47	1	2	1	74300	59.628	1123.84	0	0	0	0	0	1	1	1	1	1	1
48	1	2	1	74350	59.628	150.063	0	0	0	0	0	1	1	1	1	1	1
49	1	2	1	74400	59.628	1166.074	0	0	0	0	0	1	1	1	1	1	1
50	1	2	1	74450	59.628	1203.202	0	0	0	0	0	1	1	1	1	1	1
51	1	2	1	74500	59.628	1365.955	0	0	0	0	0	1	1	1	1	1	1
52	1	2	1	74550	59.628	1303.58	0	0	0	0	0	1	1	1	1	1	1
53	1	2	1	74600	59.628	1371.09	0	0	0	0	0	1	1	1	1	1	1
54	1	2	1	74650	59.628	1297.21	0	0	0	0	0	1	1	1	1	1	1
55	1	2	1	74700	59.628	1184.879	0	0	0	0	0	1	1	1	1	1	1
56	1	2	1	74750	59.628	131.431	0	0	0	0	0	1	1	1	1	1	1
57	1	2	1	74800	59.628	1189.859	0	0	0	0	0	1	1	1	1	1	1
58	1	2	1	74850	59.628	1172.451	0	0	0	0	0	1	1	1	1	1	1
59	1	2	1	74900	59.628	1217.689	0	0	0	0	0	1	1	1	1	1	1
60	1	2	1	74950	59.628	1228.478	0	0	0	0	0	1	1	1	1	1	1
61	1	2	1	75000	59.628	1232.487	0	0	0	0	0	1	1	1	1	1	1
62	1	2	1	75050	59.628	1215.022	0	0	0	0	0	1	1	1	1	1	1
63	1	2	1	75100	59.628	1123.519	0	0	0	0	0	1	1	1	1	1	1
64	1	2	1	75150	59.628	138.802	0	0	0	0	0	1	1	1	1	1	1
65	1	2	1	75200	59.628	1334.54	0	0	0	0	0	1	1	1	1	1	1
66	1	2	1	75250	59.628	1299.561	0	0	0	0	0	1	1	1	1	1	1
67	1	2	1	75300	59.628	1377.045	0	0	0	0	0	1	1	1	1	1	1
68	1	2	1	75350	59.628	1321.239	0	0	0	0	0	1	1	1	1	1	1
69	1	2	1	75400	59.628	1396.865	0	0	0	0	0	1	1	1	1	1	1
70	1	2	1	75450	59.628	1274.771	0	0	0	0	0	1	1	1	1	1	1
71	1	2	1	75500	59.628	1264.252	0	0	0	0	0	1	1	1	1	1	1
72	1	2	1	75550	59.628	157.573	0	0	0	0	0	1	1	1	1	1	1
73	1	2	1	75600	59.628	1330.188	0	0	0	0	0	1	1	1	1	1	1
74	1	2	1	75650	59.628	1247.997	0	0	0	0	0	1	1	1	1	1	1
75	1	2	1	75700	59.628	1243.783	0	0	0	0	0	1	1	1	1	1	1
76	1	2	1	75750	59.628	1188.115	0	0	0	0	0	1	1	1	1	1	1
77	1	2	1	75800	59.628	1172.08	0	0	0	0	0	1	1	1	1	1	1
78	1	2	1	75850	59.628	1137.937	0	0	0	0	0	1	1	1	1	1	1
79	1	2	1	75900	59.628	1167.984	0	0	0	0	0	1	1	1	1	1	1
80	1	2	1	75950	59.628	144.427	0	0	0	0	0	1	1	1	1	1	1
81	1	2	1	76000	59.628	1553.677	0	0	0	0	0	1	1	1	1	1	1
82	1	2	1	76050	59.628	1396.83	0	0	0	0	0	1	1	1	1	1	1
83	1	2	1	76100	59.628	1402.93	0	0	0	0	0	1	1	1	1	1	1
84	1	2	1	76150	59.628	1353.024	0	0	0	0	0	1	1	1	1	1	1
85	1	2	1	76200	59.628	1387.362	0	0	0	0	0	1	1	1	1	1	1
86	1	2	1	76250	59.628	1348.263	0	0	0	0	0	1	1	1	1	1	1
87	1	2	1	76300	59.628	1293.133	0	0	0	0	0	1	1	1	1	1	1
88	1	2	1	76350	59.628	141.103	0	0	0	0	0	1	1	1	1	1	1
89	1	2	1	76400	59.628	1501.029	0	0	0	0	0	1	1	1	1	1	1
90	1	2	1	76450	59.628	1461.949	0	0	0	0	0	1	1	1	1	1	1
91	1	2	1	76500	59.628	1458.028	0	0	0	0	0	1	1	1	1	1	1
92	1	2	1	76550	59.628	1404.894	0	0	0	0	0	1	1	1	1	1	1
93	1	2	1	76600	59.628	1405.624	0	0	0	0	0	1	1	1	1	1	1
94	1	2	1	76650	59.628	1353.63	0	0	0	0	0	1	1	1	1	1	1
95	1	2	1	76700	59.628	1376.944	0	0	0	0	0	1	1	1	1	1	1
96	1	2	1	76750	59.628	133.179	0	0	0	0	0	1	1	1	1	1	1
1	1	2	1	76800	59.72	720.66	0	0	0	0	0	1	1	1	1	1	1
2	1	2	1	76850	59.72	710.843	0	0	0	0	0	1	1	1	1	1	1
3	1	2	1	76900	59.72	748.877	0	0	0	0	0	1	1	1	1	1	1
4	1	2	1	76950	59.72	733.396	0	0	0	0	0	1	1	1	1	1	1
5	1	2	1	77000	59.72	715.498	0	0	0	0	0	1	1	1	1	1	1
6	1	2	1	77050	59.72	724.727	0	0	0	0	0	1	1	1	1	1	1
7	1	2	1	77100	59.72	741.252	0	0	0	0	0	1	1	1	1	1	1
8	1	2	1	77150	59.72	150.775	0	0	0	0	0	1	1	1	1	1	1
9	1	2	1	77200	59.72	638.638	0	0	0	0	0	1	1	1	1	1	1
10	1	2	1	77250	59.72	598.416	0	0	0	0	0	1	1	1	1	1	1
11	1	2	1	77300	59.72	599.124	0	0	0	0	0	1	1	1	1	1	1
12	1	2	1	77350	59.72	598.278	0	0	0	0	0	1	1	1	1	1	1
13	1	2	1	77400	59.72	647.293	0	0	0	0	0	1	1	1	1	1	1
14	1	2	1	77450	59.72	639.58	0	0	0	0	0	1	1	1	1	1	1
15	1	2	1	77500	59.72	634.869	0	0	0	0	0	1	1	1	1	1	1
16	1	2	1	77550	59.72	137.504	0	0	0	0	0	1	1	1	1	1	1
17	1	2	1	77600	59.72	829.067	0	0	0	0	0	1	1	1	1	1	1
18	1	2	1	77650	59.72	800.424	0	0	0	0	0	1	1	1	1	1	1
19	1	2	1	77700	59.72	833.947	0	0	0	0	0	1	1	1	1	1	1
20	1	2	1	77750	59.72	790.997	0	0	0	0	0	1	1	1	1	1	1
21	1	2	1	77800	59.72	846.921	0	0	0	0	0	1	1	1	1	1	1
22	1	2	1	77850	59.72	846.016	0	0	0	0	0	1	1	1	1	1	1
23	1	2	1	77900	59.72	802.688	0	0	0	0	0	1	1	1	1	1	1
24	1	2	1	77950	59.72	150.363	0	0	0	0	0	1	1	1	1	1	1
25	1	2	1	78000	59.72	847.106	0	0	0	0	0	1	1	1	1	1	1
26	1	2	1	78050	59.72	788.78	0	0	0	0	0	1	1	1	1	1	1
27	1	2	1	78100	59.72	819.438	0	0	0	0	0	1	1	1	1	1	1
28	1	2	1	78150	59.72	817.992	0	0	0	0	0	1	1	1	1	1	1
29	1	2	1	78200	59.72	838.818	0	0	0	0	0	1	1	1	1	1	1
30	1	2	1	78250	59.72	806.04	0	0	0	0	0	1	1	1	1	1	1
31	1	2	1	78300	59.72	817.79	0	0	0	0	0	1	1	1	1	1	1
32	1	2	1	78350	59.72	144.078	0	0	0	0	0	1	1	1	1	1	1
33	1	2	1	78400	59.72	1106.722	0	0	0	0	0	1	1	1	1	1	1
34	1	2	1	78450	59.72	1057.217	0	0	0	0	0	1	1	1	1	1	1
35	1	2	1	78500	59.72	1151.873	0	0	0	0	0	1	1	1	1	1	1
36	1	2	1	78550	59.72	1092.591	0	0	0	0	0	1	1	1	1	1	1
37	1	2	1	78600	59.72	1124.893	0	0	0	0	0	1	1	1	1	1	1
38	1	2	1	78650	59.72	1144.477	0	0	0	0	0	1	1	1	1	1	1
39	1	2	1	78700	59.72	1085.139	0	0	0	0	0	1	1	1	1	1	1
40	1	2	1	78750	59.72	153.405	0	0	0	0	0	1	1	1	1	1	1
41	1	2	1	78800	59.72	1073.424	0	0	0	0	0	1	1	1	1	1	1
42	1	2	1	78850	59.72	1085.026	0	0	0	0	0	1	1	1	1	1	1
43	1	2	1	78900	59.72	1127.342	0	0	0	0	0	1	1	1	1	1	1
44	1	2	1	78950	59.72	1191.522	0	0	0	0	0	1	1	1	1	1	1
45	1	2	1	79000	59.72	1160.6	0	0	0	0	0	1	1	1	1	1	1
46	1	2	1	79050	59.72	1124.905	0	0	0	0	0	1	1	1	1	1	1
47	1	2	1	79100	59.72	1121.991	0	0	0	0	0	1	1	1	1	1	1
48	1	2	1	79150	59.72	149.548	0	0	0	0	0	1	1	1	1	1	1
49	1	2	1	79200	59.72	1163.773	0	0	0	0	0	1	1	1	1	1	1
50	1	2	1	79250	59.72	1201.118	0	0	0	0	0	1	1	1	1	1	1
51	1	2	1	79300	59.72	1363.345	0	0	0	0	0	1	1	1	1	1	1
52	1	2	1	79350	59.72	1301.318	0	0	0	0	0	1	1	1	1	1	1
53	1	2	1	79400	59.72	1368.427	0	0	0	0	0	1	1	1	1	1	1
54	1	2	1	79450	59.72	1294.706	0	0	0	0	0	1	1	1	1	1	1
55	1	2	1	79500	59.72	1182.771	0	0	0	0	0	1	1	1	1	1	1
56	1	2	1	79550	59.72	130.97	0	0	0	0	0	1	1	1	1	1	1
57	1	2	1	79600	59.72	1187.585	0	0	0	0	0	1	1	1	1	1	1
58	1	2	1	79650	59.72	1170.288	0	0	0	0	0	1	1	1	1	1	1
59	1	2	1	79700	59.72	1215.249	0	0	0	0	0	1	1	1	1	1	1
60	1	2	1	79750	59.72	1226.303	0	0	0	0	0	1	1	1	1	1	1
61	1	2	1	79800	59.72	1229.998	0	0	0	0	0	1	1	1	1	1	1
62	1	2	1	79850	59.72	1212.826	0	0	0	0	0	1	1	1	1	1	1
63	1	2	1	79900	59.72	1121.278	0	0	0	0	0	1	1	1	1	1	1
64	1	2	1	79950	59.72	138.211	0	0	0	0	0	1	1	1	1	1	1
65	1	2	1	80000	59.72	1331.798	0	0	0	0	0	1	1	1	1	1	1
66	1	2	1	80050	59.72	1296.99	0	0	0	0	0	1	1	1	1	1	1
67	1	2	1	80100	59.72	1374.486	0	0	0	0	0	1	1	1	1	1	1
68	1	2	1	80150	59.72	1319.074	0	0	0	0	0	1	1	1	1	1	1
69	1	2	1	80200	59.72	1394.435	0	0	0	0	0	1	1	1	1	1	1
70	1	2	1	80250	59.72	1272.167	0	0	0	0	0	1	1	1	1	1	1
71	1	2	1	80300	59.72	1262.262	0	0	0	0	0	1	1	1	1	1	1
72	1	2	1	80350	59.72	156.936	0	0	0	0	0	1	1	1	1	1	1
73	1	2	1	80400	59.72	1327.786	0	0	0	0	0	1	1	1	1	1	1
74	1	2	1	80450	59.72	1246.413	0	0	0	0	0	1	1	1	1	1	1
75	1	2	1	80500	59.72	1241.865	0	0	0	0	0	1	1	1	1	1	1
76	1	2	1	80550	59.72	1185.868	0	0	0	0	0	1	1	1	1	1	1
77	1	2	1	80600	59.72	1169.976	0	0	0	0	0	1	1	1	1	1	1
78	1	2	1	80650	59.72	1136.145	0	0	0	0	0	1	1	1	1	1	1
79	1	2	1	80700	59.72	1166.359	0	0	0	0	0	1	1	1	1	1	1
80	1	2	1	80750	59.72	143.779	0	0	0	0	0	1	1	1	1	1	1
81	1	2	1	80800	59.72	1551.328	0	0	0	0	0	1	1	1	1	1	1
82	1	2	1	80850	59.72	1395.096	0	0	0	0	0	1	1	1	1	1	1
83	1	2	1	80900	59.72	1400.995	0	0	0	0	0	1	1	1	1	1	1
84	1	2	1	80950	59.72	1351.034	0	0	0	0	0	1	1	1	1	1	1
85	1	2	1	81000	59.72	1385.361	0	0	0	0	0	1	1	1	1	1	1
86	1	2	1	81050	59.72	1346.246	0	0	0	0	0	1	1	1	1	1	1
87	1	2	1	81100	59.72	1290.951	0	0	0	0	0	1	1	1	1	1	1
88	1	2	1	81150	59.72	140.616	0	0	0	0	0	1	1	1	1	1	1
89	1	2	1	81200	59.72	1498.621	0	0	0	0	0	1	1	1	1	1	1
90	1	2	1	81250	59.72	1459.823	0	0	0	0	0	1	1	1	1	1	1
91	1	2	1	81300	59.72	1455.527	0	0	0	0	0	1	1	1	1	1	1
92	1	2	1	81350	59.72	1402.451	0	0	0	0	0	1	1	1	1	1	1
93	1	2	1	81400	59.72	1403.393	0	0	0	0	0	1	1	1	1	1	1
94	1	2	1	81450	59.72	1351.402	0	0	0	0	0	1	1	1	1	1	1
95	1	2	1	81500	59.72	1375.045	0	0	0	0	0	1	1	1	1	1	1
96	1	2	1	81550	59.72	132.627	0	0	0	0	0	1	1	1	1	1	1
1	1	2	1	81600	59.81	718.979	0	0	0	0	0	1	1	1	1	1	1
2	1	2	1	81650	59.81	709.268	0	0	0	0	0	1	1	1	1	1	1
3	1	2	1	81700	59.81	747.436	0	0	0	0	0	1	1	1	1	1	1
4	1	2	1	81750	59.81	732.003	0	0	0	0	0	1	1	1	1	1	1
5	1	2	1	81800	59.81	713.989	0	0	0	0	0	1	1	1	1	1	1
6	1	2	1	81850	59.81	722.991	0	0	0	0	0	1	1	1	1	1	1
7	1	2	1	81900	59.81	739.693	0	0	0	0	0	1	1	1	1	1	1
8	1	2	1	81950	59.81	150.472	0	0	0	0	0	1	1	1	1	1	1
9	1	2	1	82000	59.81	637.614	0	0	0	0	0	1	1	1	1	1	1
10	1	2	1	82050	59.81	597.232	0	0	0	0	0	1	1	1	1	1	1
11	1	2	1	82100	59.81	597.766	0	0	0	0	0	1	1	1	1	1	1
12	1	2	1	82150	59.81	597.012	0	0	0	0	0	1	1	1	1	1	1
13	1	2	1	82200	59.81	645.826	0	0	0	0	0	1	1	1	1	1	1
14	1	2	1	82250	59.81	638.326	0	0	0	0	0	1	1	1	1	1	1
15	1	2	1	82300	59.81	633.437	0	0	0	0	0	1	1	1	1	1	1
16	1	2	1	82350	59.81	137.219	0	0	0	0	0	1	1	1	1	1	1
17	1	2	1	82400	59.81	827.563	0	0	0	0	0	1	1	1	1	1	1
18	1	2	1	82450	59.81	798.655	0	0	0	0	0	1	1	1	1	1	1
19	1	2	1	82500	59.81	832.385	0	0	0	0	0	1	1	1	1	1	1
20	1	2	1	82550	59.81	789.284	0	0	0	0	0	1	1	1	1	1	1
21	1	2	1	82600	59.81	844.827	0	0	0	0	0	1	1	1	1	1	1
22	1	2	1	82650	59.81	844.296	0	0	0	0	0	1	1	1	1	1	1
23	1	2	1	82700	59.81	800.922	0	0	0	0	0	1	1	1	1	1	1
24	1	2	1	82750	59.81	149.834	0	0	0	0	0	1	1	1	1	1	1
25	1	2	1	82800	59.81	845.45	0	0	0	0	0	1	1	1	1	1	1
26	1	2	1	82850	59.81	786.917	0	0	0	0	0	1	1	1	1	1	1
27	1	2	1	82900	59.81	817.675	0	0	0	0	0	1	1	1	1	1	1
28	1	2	1	82950	59.81	816.15	0	0	0	0	0	1	1	1	1	1	1
29	1	2	1	83000	59.81	837.339	0	0	0	0	0	1	1	1	1	1	1
30	1	2	1	83050	59.81	804.465	0	0	0	0	0	1	1	1	1	1	1
31	1	2	1	83100	59.81	816.008	0	0	0	0	0	1	1	1	1	1	1
32	1	2	1	83150	59.81	143.636	0	0	0	0	0	1	1	1	1	1	1
33	1	2	1	83200	59.81	1104.972	0	0	0	0	0	1	1	1	1	1	1
34	1	2	1	83250	59.81	1055.456	0	0	0	0	0	1	1	1	1	1	1
35	1	2	1	83300	59.81	1150.102	0	0	0	0	0	1	1	1	1	1	1
36	1	2	1	83350	59.81	1090.679	0	0	0	0	0	1	1	1	1	1	1
37	1	2	1	83400	59.81	1122.971	0	0	0	0	0	1	1	1	1	1	1
38	1	2	1	83450	59.81	1142.123	0	0	0	0	0	1	1	1	1	1	1
39	1	2	1	83500	59.81	1083.151	0	0	0	0	0	1	1	1	1	1	1
40	1	2	1	83550	59.81	152.988	0	0	0	0	0	1	1	1	1	1	1
41	1	2	1	83600	59.81	1071.197	0	0	0	0	0	1	1	1	1	1	1
42	1	2	1	83650	59.81	1083.025	0	0	0	0	0	1	1	1	1	1	1
43	1	2	1	83700	59.81	1125.167	0	0	0	0	0	1	1	1	1	1	1
44	1	2	1	83750	59.81	1189.479	0	0	0	0	0	1	1	1	1	1	1
45	1	2	1	83800	59.81	1158.196	0	0	0	0	0	1	1	1	1	1	1
46	1	2	1	83850	59.81	1122.85	0	0	0	0	0	1	1	1	1	1	1
47	1	2	1	83900	59.81	1119.918	0	0	0	0	0	1	1	1	1	1	1
48	1	2	1	83950	59.81	149.274	0	0	0	0	0	1	1	1	1	1	1
49	1	2	1	84000	59.81	1161.777	0	0	0	0	0	1	1	1	1	1	1
50	1	2	1	84050	59.81	1199.397	0	0	0	0	0	1	1	1	1	1	1
51	1	2	1	84100	59.81	1360.942	0	0	0	0	0	1	1	1	1	1	1
52	1	2	1	84150	59.81	1299.035	0	0	0	0	0	1	1	1	1	1	1
53	1	2	1	84200	59.81	1366.029	0	0	0	0	0	1	1	1	1	1	1
54	1	2	1	84250	59.81	1292.01	0	0	0	0	0	1	1	1	1	1	1
55	1	2	1	84300	59.81	1181.113	0	0	0	0	0	1	1	1	1	1	1
56	1	2	1	84350	59.81	130.735	0	0	0	0	0	1	1	1	1	1	1
57	1	2	1	84400	59.81	1185.376	0	0	0	0	0	1	1	1	1	1	1
58	1	2	1	84450	59.81	1168.258	0	0	0	0	0	1	1	1	1	1	1
59	1	2	1	84500	59.81	1213.265	0	0	0	0	0	1	1	1	1	1	1
60	1	2	1	84550	59.81	1223.775	0	0	0	0	0	1	1	1	1	1	1
61	1	2	1	84600	59.81	1227.97	0	0	0	0	0	1	1	1	1	1	1
62	1	2	1	84650	59.81	1210.664	0	0	0	0	0	1	1	1	1	1	1
63	1	2	1	84700	59.81	1119.258	0	0	0	0	0	1	1	1	1	1	1
64	1	2	1	84750	59.81	137.812	0	0	0	0	0	1	1	1	1	1	1
65	1	2	1	84800	59.81	1330.11	0	0	0	0	0	1	1	1	1	1	1
66	1	2	1	84850	59.81	1295.476	0	0	0	0	0	1	1	1	1	1	1
67	1	2	1	84900	59.81	1372.645	0	0	0	0	0	1	1	1	1	1	1
68	1	2	1	84950	59.81	1316.749	0	0	0	0	0	1	1	1	1	1	1
69	1	2	1	85000	59.81	1392.102	0	0	0	0	0	1	1	1	1	1	1
70	1	2	1	85050	59.81	1270.03	0	0	0	0	0	1	1	1	1	1	1
71	1	2	1	85100	59.81	1260.024	0	0	0	0	0	1	1	1	1	1	1
72	1	2	1	85150	59.81	156.264	0	0	0	0	0	1	1	1	1	1	1
73	1	2	1	85200	59.81	1325.358	0	0	0	0	0	1	1	1	1	1	1
74	1	2	1	85250	59.81	1244.78	0	0	0	0	0	1	1	1	1	1	1
75	1	2	1	85300	59.81	1239.597	0	0	0	0	0	1	1	1	1	1	1
76	1	2	1	85350	59.81	1183.646	0	0	0	0	0	1	1	1	1	1	1
77	1	2	1	85400	59.81	1167.693	0	0	0	0	0	1	1	1	1	1	1
78	1	2	1	85450	59.81	1134.342	0	0	0	0	0	1	1	1	1	1	1
79	1	2	1	85500	59.81	1164.678	0	0	0	0	0	1	1	1	1	1	1
80	1	2	1	85550	59.81	143.349	0	0	0	0	0	1	1	1	1	1	1
81	1	2	1	85600	59.81	1548.841	0	0	0	0	0	1	1	1	1	1	1
82	1	2	1	85650	59.81	1393.613	0	0	0	0	0	1	1	1	1	1	1
83	1	2	1	85700	59.81	1399.191	0	0	0	0	0	1	1	1	1	1	1
84	1	2	1	85750	59.81	1349.075	0	0	0	0	0	1	1	1	1	1	1
85	1	2	1	85800	59.81	1383.35	0	0	0	0	0	1	1	1	1	1	1
86	1	2	1	85850	59.81	1344.18	0	0	0	0	0	1	1	1	1	1	1
87	1	2	1	85900	59.81	1289.479	0	0	0	0	0	1	1	1	1	1	1
88	1	2	1	85950	59.81	140.261	0	0	0	0	0	1	1	1	1	1	1
89	1	2	1	86000	59.81	1496.085	0	0	0	0	0	1	1	1	1	1	1
90	1	2	1	86050	59.81	1457.037	0	0	0	0	0	1	1	1	1	1	1
91	1	2	1	86100	59.81	1453.601	0	0	0	0	0	1	1	1	1	1	1
92	1	2	1	86150	59.81	1400.471	0	0	0	0	0	1	1	1	1	1	1
93	1	2	1	86200	59.81	1401.243	0	0	0	0	0	1	1	1	1	1	1
94	1	2	1	86250	59.81	1349.504	0	0	0	0	0	1	1	1	1	1	1
95	1	2	1	86300	59.81	1372.385	0	0	0	0	0	1	1	1	1	1	1
96	1	2	1	86350	59.81	132.245	0	0	0	0	0	1	1	1	1	1	1
1	1	2	1	86400	59.901	717.189	0	0	0	0	0	1	1	1	1	1	1
2	1	2	1	86450	59.901	707.437	0	0	0	0	0	1	1	1	1	1	1
3	1	2	1	86500	59.901	745.759	0	0	0	0	0	1	1	1	1	1	1
4	1	2	1	86550	59.901	730.51	0	0	0	0	0	1	1	1	1	1	1
5	1	2	1	86600	59.901	712.261	0	0	0	0	0	1	1	1	1	1	1
6	1	2	1	86650	59.901	721.631	0	0	0	0	0	1	1	1	1	1	1
7	1	2	1	86700	59.901	737.992	0	0	0	0	0	1	1	1	1	1	1
8	1	2	1	86750	59.901	150.027	0	0	0	0	0	1	1	1	1	1	1
9	1	2	1	86800	59.901	636.148	0	0	0	0	0	1	1	1	1	1	1
10	1	2	1	86850	59.901	595.828	0	0	0	0	0	1	1	1	1	1	1
11	1	2	1	86900	59.901	596.367	0	0	0	0	0	1	1	1	1	1	1
12	1	2	1	86950	59.901	595.639	0	0	0	0	0	1	1	1	1	1	1
13	1	2	1	87000	59.901	644.364	0	0	0	0	0	1	1	1	1	1	1
14	1	2	1	87050	59.901	636.9	0	0	0	0	0	1	1	1	1	1	1
15	1	2	1	87100	59.901	632.222	0	0	0	0	0	1	1	1	1	1	1
16	1	2	1	87150	59.901	136.87	0	0	0	0	0	1	1	1	1	1	1
17	1	2	1	87200	59.901	825.777	0	0	0	0	0	1	1	1	1	1	1
18	1	2	1	87250	59.901	797.156	0	0	0	0	0	1	1	1	1	1	1
19	1	2	1	87300	59.901	830.498	0	0	0	0	0	1	1	1	1	1	1
20	1	2	1	87350	59.901	787.48	0	0	0	0	0	1	1	1	1	1	1
21	1	2	1	87400	59.901	843.351	0	0	0	0	0	1	1	1	1	1	1
22	1	2	1	87450	59.901	842.59	0	0	0	0	0	1	1	1	1	1	1
23	1	2	1	87500	59.901	799.695	0	0	0	0	0	1	1	1	1	1	1
24	1	2	1	87550	59.901	149.398	0	0	0	0	0	1	1	1	1	1	1
25	1	2	1	87600	59.901	843.563	0	0	0	0	0	1	1	1	1	1	1
26	1	2	1	87650	59.901	785.24	0	0	0	0	0	1	1	1	1	1	1
27	1	2	1	87700	59.901	815.933	0	0	0	0	0	1	1	1	1	1	1
28	1	2	1	87750	59.901	814.416	0	0	0	0	0	1	1	1	1	1	1
29	1	2	1	87800	59.901	835.345	0	0	0	0	0	1	1	1	1	1	1
30	1	2	1	87850	59.901	802.645	0	0	0	0	0	1	1	1	1	1	1
31	1	2	1	87900	59.901	814.374	0	0	0	0	0	1	1	1	1	1	1
32	1	2	1	87950	59.901	143.225	0	0	0	0	0	1	1	1	1	1	1
33	1	2	1	88000	59.901	1102.707	0	0	0	0	0	1	1	1	1	1	1
34	1	2	1	88050	59.901	1053.625	0	0	0	0	0	1	1	1	1	1	1
35	1	2	1	88100	59.901	1147.926	0	0	0	0	0	1	1	1	1	1	1
36	1	2	1	88150	59.901	1088.554	0	0	0	0	0	1	1	1	1	1	1
37	1	2	1	88200	59.901	1120.507	0	0	0	0	0	1	1	1	1	1	1
38	1	2	1	88250	59.901	1139.849	0	0	0	0	0	1	1	1	1	1	1
39	1	2	1	88300	59.901	1081.26	0	0	0	0	0	1	1	1	1	1	1
40	1	2	1	88350	59.901	152.551	0	0	0	0	0	1	1	1	1	1	1
41	1	2	1	88400	59.901	1069.159	0	0	0	0	0	1	1	1	1	1	1
42	1	2	1	88450	59.901	1080.721	0	0	0	0	0	1	1	1	1	1	1
43	1	2	1	88500	59.901	1123.323	0	0	0	0	0	1	1	1	1	1	1
44	1	2	1	88550	59.901	1187.045	0	0	0	0	0	1	1	1	1	1	1
45	1	2	1	88600	59.901	1155.949	0	0	0	0	0	1	1	1	1	1	1
46	1	2	1	88650	59.901	1120.794	0	0	0	0	0	1	1	1	1	1	1
47	1	2	1	88700	59.901	1117.88	0	0	0	0	0	1	1	1	1	1	1
48	1	2	1	88750	59.901	148.848	0	0	0	0	0	1	1	1	1	1	1
49	1	2	1	88800	59.901	1159.567	0	0	0	0	0	1	1	1	1	1	1
50	1	2	1	88850	59.901	1197.001	0	0	0	0	0	1	1	1	1	1	1
51	1	2	1	88900	59.901	1358.442	0	0	0	0	0	1	1	1	1	1	1
52	1	2	1	88950	59.901	1296.404	0	0	0	0	0	1	1	1	1	1	1
53	1	2	1	89000	59.901	1363.447	0	0	0	0	0	1	1	1	1	1	1
54	1	2	1	89050	59.901	1289.766	0	0	0	0	0	1	1	1	1	1	1
55	1	2	1	89100	59.901	1179.201	0	0	0	0	0	1	1	1	1	1	1
56	1	2	1	89150	59.901	130.343	0	0	0	0	0	1	1	1	1	1	1
57	1	2	1	89200	59.901	1183.184	0	0	0	0	0	1	1	1	1	1	1
58	1	2	1	89250	59.901	1166.505	0	0	0	0	0	1	1	1	1	1	1
59	1	2	1	89300	59.901	1211.032	0	0	0	0	0	1	1	1	1	1	1
60	1	2	1	89350	59.901	1221.882	0	0	0	0	0	1	1	1	1	1	1
61	1	2	1	89400	59.901	1225.695	0	0	0	0	0	1	1	1	1	1	1
62	1	2	1	89450	59.901	1208.707	0	0	0	0	0	1	1	1	1	1	1
63	1	2	1	89500	59.901	1117.221	0	0	0	0	0	1	1	1	1	1	1
64	1	2	1	89550	59.901	137.426	0	0	0	0	0	1	1	1	1	1	1
65	1	2	1	89600	59.901	1327.629	0	0	0	0	0	1	1	1	1	1	1
66	1	2	1	89650	59.901	1293.01	0	0	0	0	0	1	1	1	1	1	1
67	1	2	1	89700	59.901	1370.156	0	0	0	0	0	1	1	1	1	1	1
68	1	2	1	89750	59.901	1314.586	0	0	0	0	0	1	1	1	1	1	1
69	1	2	1	89800	59.901	1389.852	0	0	0	0	0	1	1	1	1	1	1
70	1	2	1	89850	59.901	1267.849	0	0	0	0	0	1	1	1	1	1	1
71	1	2	1	89900	59.901	1258.155	0	0	0	0	0	1	1	1	1	1	1
72	1	2	1	89950	59.901	155.749	0	0	0	0	0	1	1	1	1	1	1
73	1	2	1	90000	59.901	1323.072	0	0	0	0	0	1	1	1	1	1	1
74	1	2	1	90050	59.901	1242.847	0	0	0	0	0	1	1	1	1	1	1
75	1	2	1	90100	59.901	1237.696	0	0	0	0	0	1	1	1	1	1	1
76	1	2	1	90150	59.901	1181.699	0	0	0	0	0	1	1	1	1	1	1
77	1	2	1	90200	59.901	1165.712	0	0	0	0	0	1	1	1	1	1	1
78	1	2	1	90250	59.901	1132.208	0	0	0	0	0	1	1	1	1	1	1
79	1	2	1	90300	59.901	1162.827	0	0	0	0	0	1	1	1	1	1	1
80	1	2	1	90350	59.901	142.717	0	0	0	0	0	1	1	1	1	1	1
81	1	2	1	90400	59.901	1546.174	0	0	0	0	0	1	1	1	1	1	1
82	1	2	1	90450	59.901	1391.755	0	0	0	0	0	1	1	1	1	1	1
83	1	2	1	90500	59.901	1396.995	0	0	0	0	0	1	1	1	1	1	1
84	1	2	1	90550	59.901	1347.381	0	0	0	0	0	1	1	1	1	1	1
85	1	2	1	90600	59.901	1381.318	0	0	0	0	0	1	1	1	1	1	1
86	1	2	1	90650	59.901	1342.286	0	0	0	0	0	1	1	1	1	1	1
87	1	2	1	90700	59.901	1287.547	0	0	0	0	0	1	1	1	1	1	1
88	1	2	1	90750	59.901	139.811	0	0	0	0	0	1	1	1	1	1	1
89	1	2	1	90800	59.901	1493.854	0	0	0	0	0	1	1	1	1	1	1
90	1	2	1	90850	59.901	1454.859	0	0	0	0	0	1	1	1	1	1	1
91	1	2	1	90900	59.901	1451.057	0	0	0	0	0	1	1	1	1	1	1
92	1	2	1	90950	59.901	1398.277	0	0	0	0	0	1	1	1	1	1	1
93	1	2	1	91000	59.901	1399.112	0	0	0	0	0	1	1	1	1	1	1
94	1	2	1	91050	59.901	1347.537	0	0	0	0	0	1	1	1	1	1	1
95	1	2	1	91100	59.901	1370.472	0	0	0	0	0	1	1	1	1	1	1
96	1	2	1	91150	59.901	131.912	0	0	0	0	0	1	1	1	1	1	1
1	1	2	1	91200	59.99	715.882	0	0	0	0	0	1	1	1	1	1	1
2	1	2	1	91250	59.99	706.102	0	0	0	0	0	1	1	1	1	1	1
3	1	2	1	91300	59.99	744.282	0	0	0	0	0	1	1	1	1	1	1
4	1	2	1	91350	59.99	728.971	0	0	0	0	0	1	1	1	1	1	1
5	1	2	1	91400	59.99	710.791	0	0	0	0	0	1	1	1	1	1	1
6	1	2	1	91450	59.99	720.132	0	0	0	0	0	1	1	1	1	1	1
7	1	2	1	91500	59.99	736.406	0	0	0	0	0	1	1	1	1	1	1
8	1	2	1	91550	59.99	149.76	0	0	0	0	0	1	1	1	1	1	1
9	1	2	1	91600	59.99	634.597	0	0	0	0	0	1	1	1	1	1	1
10	1	2	1	91650	59.99	594.739	0	0	0	0	0	1	1	1	1	1	1
11	1	2	1	91700	59.99	595.133	0	0	0	0	0	1	1	1	1	1	1
12	1	2	1	91750	59.99	594.241	0	0	0	0	0	1	1	1	1	1	1
13	1	2	1	91800	59.99	642.99	0	0	0	0	0	1	1	1	1	1	1
14	1	2	1	91850	59.99	635.595	0	0	0	0	0	1	1	1	1	1	1
15	1	2	1	91900	59.99	631.196	0	0	0	0	0	1	1	1	1	1	1
16	1	2	1	91950	59.99	136.623	0	0	0	0	0	1	1	1	1	1	1
17	1	2	1	92000	59.99	824.007	0	0	0	0	0	1	1	1	1	1	1
18	1	2	1	92050	59.99	795.667	0	0	0	0	0	1	1	1	1	1	1
19	1	2	1	92100	59.99	828.809	0	0	0	0	0	1	1	1	1	1	1
20	1	2	1	92150	59.99	785.981	0	0	0	0	0	1	1	1	1	1	1
21	1	2	1	92200	59.99	841.45	0	0	0	0	0	1	1	1	1	1	1
22	1	2	1	92250	59.99	840.879	0	0	0	0	0	1	1	1	1	1	1
23	1	2	1	92300	59.99	797.72	0	0	0	0	0	1	1	1	1	1	1
24	1	2	1	92350	59.99	148.954	0	0	0	0	0	1	1	1	1	1	1
25	1	2	1	92400	59.99	842.019	0	0	0	0	0	1	1	1	1	1	1
26	1	2	1	92450	59.99	783.627	0	0	0	0	0	1	1	1	1	1	1
27	1	2	1	92500	59.99	814.177	0	0	0	0	0	1	1	1	1	1	1
28	1	2	1	92550	59.99	812.643	0	0	0	0	0	1	1	1	1	1	1
29	1	2	1	92600	59.99	833.568	0	0	0	0	0	1	1	1	1	1	1
30	1	2	1	92650	59.99	801.072	0	0	0	0	0	1	1	1	1	1	1
31	1	2	1	92700	59.99	812.779	0	0	0	0	0	1	1	1	1	1	1
32	1	2	1	92750	59.99	142.722	0	0	0	0	0	1	1	1	1	1	1
33	1	2	1	92800	59.99	1100.51	0	0	0	0	0	1	1	1	1	1	1
34	1	2	1	92850	59.99	1051.74	0	0	0	0	0	1	1	1	1	1	1
35	1	2	1	92900	59.99	1145.547	0	0	0	0	0	1	1	1	1	1	1
36	1	2	1	92950	59.99	1086.273	0	0	0	0	0	1	1	1	1	1	1
37	1	2	1	93000	59.99	1118.518	0	0	0	0	0	1	1	1	1	1	1
38	1	2	1	93050	59.99	1137.922	0	0	0	0	0	1	1	1	1	1	1
39	1	2	1	93100	59.99	1079.543	0	0	0	0	0	1	1	1	1	1	1
40	1	2	1	93150	59.99	152.199	0	0	0	0	0	1	1	1	1	1	1
41	1	2	1	93200	59.99	1067.096	0	0	0	0	0	1	1	1	1	1	1
42	1	2	1	93250	59.99	1078.945	0	0	0	0	0	1	1	1	1	1	1
43	1	2	1	93300	59.99	1120.932	0	0	0	0	0	1	1	1	1	1	1
44	1	2	1	93350	59.99	1184.755	0	0	0	0	0	1	1	1	1	1	1
45	1	2	1	93400	59.99	1153.762	0	0	0	0	0	1	1	1	1	1	1
46	1	2	1	93450	59.99	1118.713	0	0	0	0	0	1	1	1	1	1	1
47	1	2	1	93500	59.99	1116.099	0	0	0	0	0	1	1	1	1	1	1
48	1	2	1	93550	59.99	148.527	0	0	0	0	0	1	1	1	1	1	1
49	1	2	1	93600	59.99	1157.435	0	0	0	0	0	1	1	1	1	1	1
50	1	2	1	93650	59.99	1195.219	0	0	0	0	0	1	1	1	1	1	1
51	1	2	1	93700	59.99	1355.934	0	0	0	0	0	1	1	1	1	1	1
52	1	2	1	93750	59.99	1294.499	0	0	0	0	0	1	1	1	1	1	1
53	1	2	1	93800	59.99	1361.043	0	0	0	0	0	1	1	1	1	1	1
54	1	2	1	93850	59.99	1287.41	0	0	0	0	0	1	1	1	1	1	1
55	1	2	1	93900	59.99	1177.404	0	0	0	0	0	1	1	1	1	1	1
56	1	2	1	93950	59.99	130.189	0	0	0	0	0	1	1	1	1	1	1
57	1	2	1	94000	59.99	1181.185	0	0	0	0	0	1	1	1	1	1	1
58	1	2	1	94050	59.99	1164.267	0	0	0	0	0	1	1	1	1	1	1
59	1	2	1	94100	59.99	1209.081	0	0	0	0	0	1	1	1	1	1	1
60	1	2	1	94150	59.99	1219.5	0	0	0	0	0	1	1	1	1	1	1
61	1	2	1	94200	59.99	1223.536	0	0	0	0	0	1	1	1	1	1	1
62	1	2	1	94250	59.99	1206.444	0	0	0	0	0	1	1	1	1	1	1
63	1	2	1	94300	59.99	1115.405	0	0	0	0	0	1	1	1	1	1	1
64	1	2	1	94350	59.99	137.041	0	0	0	0	0	1	1	1	1	1	1
65	1	2	1	94400	59.99	1325.358	0	0	0	0	0	1	1	1	1	1	1
66	1	2	1	94450	59.99	1291.104	0	0	0	0	0	1	1	1	1	1	1
67	1	2	1	94500	59.99	1367.84	0	0	0	0	0	1	1	1	1	1	1
68	1	2	1	94550	59.99	1312.171	0	0	0	0	0	1	1	1	1	1	1
69	1	2	1	94600	59.99	1387.479	0	0	0	0	0	1	1	1	1	1	1
70	1	2	1	94650	59.99	1265.753	0	0	0	0	0	1	1	1	1	1	1
71	1	2	1	94700	59.99	1256.211	0	0	0	0	0	1	1	1	1	1	1
72	1	2	1	94750	59.99	155.313	0	0	0	0	0	1	1	1	1	1	1
73	1	2	1	94800	59.99	1320.964	0	0	0	0	0	1	1	1	1	1	1
74	1	2	1	94850	59.99	1241.292	0	0	0	0	0	1	1	1	1	1	1
75	1	2	1	94900	59.99	1235.765	0	0	0	0	0	1	1	1	1	1	1
76	1	2	1	94950	59.99	1179.45	0	0	0	0	0	1	1	1	1	1	1
77	1	2	1	95000	59.99	1163.707	0	0	0	0	0	1	1	1	1	1	1
78	1	2	1	95050	59.99	1130.677	0	0	0	0	0	1	1	1	1	1	1
79	1	2	1	95100	59.99	1161.05	0	0	0	0	0	1	1	1	1	1	1
80	1	2	1	95150	59.99	142.436	0	0	0	0	0	1	1	1	1	1	1
81	1	2	1	95200	59.99	1543.866	0	0	0	0	0	1	1	1	1	1	1
82	1	2	1	95250	59.99	1389.932	0	0	0	0	0	1	1	1	1	1	1
83	1	2	1	95300	59.99	1395.28	0	0	0	0	0	1	1	1	1	1	1
84	1	2	1	95350	59.99	1345.568	0	0	0	0	0	1	1	1	1	1	1
85	1	2	1	95400	59.99	1379.316	0	0	0	0	0	1	1	1	1	1	1
86	1	2	1	95450	59.99	1340.499	0	0	0	0	0	1	1	1	1	1	1
87	1	2	1	95500	59.99	1286.071	0	0	0	0	0	1	1	1	1	1	1
88	1	2	1	95550	59.99	139.48	0	0	0	0	0	1	1	1	1	1	1
89	1	2	1	95600	59.99	1491.732	0	0	0	0	0	1	1	1	1	1	1
90	1	2	1	95650	59.99	1452.747	0	0	0	0	0	1	1	1	1	1	1
91	1	2	1	95700	59.99	1449.218	0	0	0	0	0	1	1	1	1	1	1
92	1	2	1	95750	59.99	1396.224	0	0	0	0	0	1	1	1	1	1	1
93	1	2	1	95800	59.99	1397.114	0	0	0	0	0	1	1	1	1	1	1
94	1	2	1	95850	59.99	1345.28	0	0	0	0	0	1	1	1	1	1	1
95	1	2	1	95900	59.99	1368.487	0	0	0	0	0	1	1	1	1	1	1
96	1	2	1	95950	59.99	131.555	0	0	0	0	0	1	1	1	1	1	1
1	1	2	1	96000	60.079	713.964	0	0	0	0	0	1	1	1	1	1	1
2	1	2	1	96050	60.079	704.393	0	0	0	0	0	1	1	1	1	1	1
3	1	2	1	96100	60.079	742.25	0	0	0	0	0	1	1	1	1	1	1
4	1	2	1	96150	60.079	727.353	0	0	0	0	0	1	1	1	1	1	1
5	1	2	1	96200	60.079	709.017	0	0	0	0	0	1	1	1	1	1	1
6	1	2	1	96250	60.079	718.482	0	0	0	0	0	1	1	1	1	1	1
7	1	2	1	96300	60.079	734.934	0	0	0	0	0	1	1	1	1	1	1
8	1	2	1	96350	60.079	149.345	0	0	0	0	0	1	1	1	1	1	1
9	1	2	1	96400	60.079	633.346	0	0	0	0	0	1	1	1	1	1	1
10	1	2	1	96450	60.079	593.4	0	0	0	0	0	1	1	1	1	1	1
11	1	2	1	96500	60.079	593.792	0	0	0	0	0	1	1	1	1	1	1
12	1	2	1	96550	60.079	592.791	0	0	0	0	0	1	1	1	1	1	1
13	1	2	1	96600	60.079	641.238	0	0	0	0	0	1	1	1	1	1	1
14	1	2	1	96650	60.079	634.159	0	0	0	0	0	1	1	1	1	1	1
15	1	2	1	96700	60.079	629.634	0	0	0	0	0	1	1	1	1	1	1
16	1	2	1	96750	60.079	136.351	0	0	0	0	0	1	1	1	1	1	1
17	1	2	1	96800	60.079	822.41	0	0	0	0	0	1	1	1	1	1	1
18	1	2	1	96850	60.079	793.889	0	0	0	0	0	1	1	1	1	1	1
19	1	2	1	96900	60.079	827.08	0	0	0	0	0	1	1	1	1	1	1
20	1	2	1	96950	60.079	784.092	0	0	0	0	0	1	1	1	1	1	1
21	1	2	1	97000	60.079	839.646	0	0	0	0	0	1	1	1	1	1	1
22	1	2	1	97050	60.079	838.934	0	0	0	0	0	1	1	1	1	1	1
23	1	2	1	97100	60.079	796.398	0	0	0	0	0	1	1	1	1	1	1
24	1	2	1	97150	60.079	148.498	0	0	0	0	0	1	1	1	1	1	1
25	1	2	1	97200	60.079	839.991	0	0	0	0	0	1	1	1	1	1	1
26	1	2	1	97250	60.079	781.874	0	0	0	0	0	1	1	1	1	1	1
27	1	2	1	97300	60.079	812.274	0	0	0	0	0	1	1	1	1	1	1
28	1	2	1	97350	60.079	810.966	0	0	0	0	0	1	1	1	1	1	1
29	1	2	1	97400	60.079	831.804	0	0	0	0	0	1	1	1	1	1	1
30	1	2	1	97450	60.079	799.304	0	0	0	0	0	1	1	1	1	1	1
31	1	2	1	97500	60.079	811.118	0	0	0	0	0	1	1	1	1	1	1
32	1	2	1	97550	60.079	142.435	0	0	0	0	0	1	1	1	1	1	1
33	1	2	1	97600	60.079	1098.216	0	0	0	0	0	1	1	1	1	1	1
34	1	2	1	97650	60.079	1049.837	0	0	0	0	0	1	1	1	1	1	1
35	1	2	1	97700	60.079	1143.498	0	0	0	0	0	1	1	1	1	1	1
36	1	2	1	97750	60.079	1084.234	0	0	0	0	0	1	1	1	1	1	1
37	1	2	1	97800	60.079	1116.067	0	0	0	0	0	1	1	1	1	1	1
38	1	2	1	97850	60.079	1135.432	0	0	0	0	0	1	1	1	1	1	1
39	1	2	1	97900	60.079	1077.183	0	0	0	0	0	1	1	1	1	1	1
40	1	2	1	97950	60.079	151.861	0	0	0	0	0	1	1	1	1	1	1
41	1	2	1	98000	60.079	1064.757	0	0	0	0	0	1	1	1	1	1	1
42	1	2	1	98050	60.079	1076.931	0	0	0	0	0	1	1	1	1	1	1
43	1	2	1	98100	60.079	1118.763	0	0	0	0	0	1	1	1	1	1	1
44	1	2	1	98150	60.079	1182.404	0	0	0	0	0	1	1	1	1	1	1
45	1	2	1	98200	60.079	1151.247	0	0	0	0	0	1	1	1	1	1	1
46	1	2	1	98250	60.079	1116.325	0	0	0	0	0	1	1	1	1	1	1
47	1	2	1	98300	60.079	1113.857	0	0	0	0	0	1	1	1	1	1	1
48	1	2	1	98350	60.079	148.105	0	0	0	0	0	1	1	1	1	1	1
49	1	2	1	98400	60.079	1155.172	0	0	0	0	0	1	1	1	1	1	1
50	1	2	1	98450	60.079	1192.667	0	0	0	0	0	1	1	1	1	1	1
51	1	2	1	98500	60.079	1353.377	0	0	0	0	0	1	1	1	1	1	1
52	1	2	1	98550	60.079	1291.727	0	0	0	0	0	1	1	1	1	1	1
53	1	2	1	98600	60.079	1358.429	0	0	0	0	0	1	1	1	1	1	1
54	1	2	1	98650	60.079	1285.047	0	0	0	0	0	1	1	1	1	1	1
55	1	2	1	98700	60.079	1175.341	0	0	0	0	0	1	1	1	1	1	1
56	1	2	1	98750	60.079	129.821	0	0	0	0	0	1	1	1	1	1	1
57	1	2	1	98800	60.079	1178.805	0	0	0	0	0	1	1	1	1	1	1
58	1	2	1	98850	60.079	1161.984	0	0	0	0	0	1	1	1	1	1	1
59	1	2	1	98900	60.079	1206.984	0	0	0	0	0	1	1	1	1	1	1
60	1	2	1	98950	60.079	1216.853	0	0	0	0	0	1	1	1	1	1	1
61	1	2	1	99000	60.079	1220.92	0	0	0	0	0	1	1	1	1	1	1
62	1	2	1	99050	60.079	1204.156	0	0	0	0	0	1	1	1	1	1	1
63	1	2	1	99100	60.079	1113.191	0	0	0	0	0	1	1	1	1	1	1
64	1	2	1	99150	60.079	136.581	0	0	0	0	0	1	1	1	1	1	1
65	1	2	1	99200	60.079	1322.94	0	0	0	0	0	1	1	1	1	1	1
66	1	2	1	99250	60.079	1288.767	0	0	0	0	0	1	1	1	1	1	1
67	1	2	1	99300	60.079	1365.675	0	0	0	0	0	1	1	1	1	1	1
68	1	2	1	99350	60.079	1310.165	0	0	0	0	0	1	1	1	1	1	1
69	1	2	1	99400	60.079	1385.014	0	0	0	0	0	1	1	1	1	1	1
70	1	2	1	99450	60.079	1263.223	0	0	0	0	0	1	1	1	1	1	1
71	1	2	1	99500	60.079	1254.275	0	0	0	0	0	1	1	1	1	1	1
72	1	2	1	99550	60.079	154.632	0	0	0	0	0	1	1	1	1	1	1
73	1	2	1	99600	60.079	1318.411	0	0	0	0	0	1	1	1	1	1	1
74	1	2	1	99650	60.079	1239.352	0	0	0	0	0	1	1	1	1	1	1
75	1	2	1	99700	60.079	1233.453	0	0	0	0	0	1	1	1	1	1	1
76	1	2	1	99750	60.079	1177.35	0	0	0	0	0	1	1	1	1	1	1
77	1	2	1	99800	60.079	1161.452	0	0	0	0	0	1	1	1	1	1	1
78	1	2	1	99850	60.079	1128.258	0	0	0	0	0	1	1	1	1	1	1
79	1	2	1	99900	60.079	1159.047	0	0	0	0	0	1	1	1	1	1	1
[truncated: 40,433 more rows]
