# Supplementary material for: Analysis of HIV Using a High Resolution Melting (HRM) Diversity Assay: Automation of HRM Data Analysis Enhances the Utility of the Assay for Analysis of HIV Incidence
Source: PLoS One. 2012 Dec 11;7(12):e51359. doi: 10.1371/journal.pone.0051359 (PMC3519891; doi:10.1371/journal.pone.0051359)
Supplement: Archive S1 — Test dataset for analysis with the HRM Diversity Assay Analysis Tool (DivMelt). Artificial diverse DNA populations were created by mixing mutagenized and wildtype HIV-derived plasmids. The diverse DNA populations were amplified and analyzed with the HRM diversity assay. These data files were exported from the LightScanner Instrument and Analysis Software (BioFire Diagnostics, Salt Lake City, UT) package and serve as input data for DivMelt. (ZIP) [file pone.0051359.s001.zip › Archive_S1/DivMelt_test_data.TEM]

Time	Temperature
0.000	58.254
50.000	58.254
100.000	58.254
150.000	58.254
200.000	58.254
250.000	58.254
300.000	58.254
350.000	58.254
400.000	58.254
450.000	58.254
500.000	58.254
550.000	58.254
600.000	58.254
650.000	58.254
700.000	58.254
750.000	58.254
800.000	58.254
850.000	58.254
900.000	58.254
950.000	58.254
1000.000	58.254
1050.000	58.254
1100.000	58.254
1150.000	58.254
1200.000	58.254
1250.000	58.254
1300.000	58.254
1350.000	58.254
1400.000	58.254
1450.000	58.254
1500.000	58.254
1550.000	58.254
1600.000	58.254
1650.000	58.254
1700.000	58.254
1750.000	58.254
1800.000	58.254
1850.000	58.254
1900.000	58.254
1950.000	58.254
2000.000	58.254
2050.000	58.254
2100.000	58.254
2150.000	58.254
2200.000	58.254
2250.000	58.254
2300.000	58.254
2350.000	58.254
2400.000	58.254
2450.000	58.254
2500.000	58.254
2550.000	58.254
2600.000	58.254
2650.000	58.254
2700.000	58.254
2750.000	58.254
2800.000	58.254
2850.000	58.254
2900.000	58.254
2950.000	58.254
3000.000	58.254
3050.000	58.254
3100.000	58.254
3150.000	58.254
3200.000	58.254
3250.000	58.254
3300.000	58.254
3350.000	58.254
3400.000	58.254
3450.000	58.254
3500.000	58.254
3550.000	58.254
3600.000	58.254
3650.000	58.254
3700.000	58.254
3750.000	58.254
3800.000	58.254
3850.000	58.254
3900.000	58.254
3950.000	58.254
4000.000	58.254
4050.000	58.254
4100.000	58.254
4150.000	58.254
4200.000	58.254
4250.000	58.254
4300.000	58.254
4350.000	58.254
4400.000	58.254
4450.000	58.254
4500.000	58.254
4550.000	58.254
4600.000	58.254
4650.000	58.254
4700.000	58.254
4750.000	58.254
4800.000	58.339
4850.000	58.339
4900.000	58.339
4950.000	58.339
5000.000	58.339
5050.000	58.339
5100.000	58.339
5150.000	58.339
5200.000	58.339
5250.000	58.339
5300.000	58.339
5350.000	58.339
5400.000	58.339
5450.000	58.339
5500.000	58.339
5550.000	58.339
5600.000	58.339
5650.000	58.339
5700.000	58.339
5750.000	58.339
5800.000	58.339
5850.000	58.339
5900.000	58.339
5950.000	58.339
6000.000	58.339
6050.000	58.339
6100.000	58.339
6150.000	58.339
6200.000	58.339
6250.000	58.339
6300.000	58.339
6350.000	58.339
6400.000	58.339
6450.000	58.339
6500.000	58.339
6550.000	58.339
6600.000	58.339
6650.000	58.339
6700.000	58.339
6750.000	58.339
6800.000	58.339
6850.000	58.339
6900.000	58.339
6950.000	58.339
7000.000	58.339
7050.000	58.339
7100.000	58.339
7150.000	58.339
7200.000	58.339
7250.000	58.339
7300.000	58.339
7350.000	58.339
7400.000	58.339
7450.000	58.339
7500.000	58.339
7550.000	58.339
7600.000	58.339
7650.000	58.339
7700.000	58.339
7750.000	58.339
7800.000	58.339
7850.000	58.339
7900.000	58.339
7950.000	58.339
8000.000	58.339
8050.000	58.339
8100.000	58.339
8150.000	58.339
8200.000	58.339
8250.000	58.339
8300.000	58.339
8350.000	58.339
8400.000	58.339
8450.000	58.339
8500.000	58.339
8550.000	58.339
8600.000	58.339
8650.000	58.339
8700.000	58.339
8750.000	58.339
8800.000	58.339
8850.000	58.339
8900.000	58.339
8950.000	58.339
9000.000	58.339
9050.000	58.339
9100.000	58.339
9150.000	58.339
9200.000	58.339
9250.000	58.339
9300.000	58.339
9350.000	58.339
9400.000	58.339
9450.000	58.339
9500.000	58.339
9550.000	58.339
9600.000	58.419
9650.000	58.419
9700.000	58.419
9750.000	58.419
9800.000	58.419
9850.000	58.419
9900.000	58.419
9950.000	58.419
10000.000	58.419
10050.000	58.419
10100.000	58.419
10150.000	58.419
10200.000	58.419
10250.000	58.419
10300.000	58.419
10350.000	58.419
10400.000	58.419
10450.000	58.419
10500.000	58.419
10550.000	58.419
10600.000	58.419
10650.000	58.419
10700.000	58.419
10750.000	58.419
10800.000	58.419
10850.000	58.419
10900.000	58.419
10950.000	58.419
11000.000	58.419
11050.000	58.419
11100.000	58.419
11150.000	58.419
11200.000	58.419
11250.000	58.419
11300.000	58.419
11350.000	58.419
11400.000	58.419
11450.000	58.419
11500.000	58.419
11550.000	58.419
11600.000	58.419
11650.000	58.419
11700.000	58.419
11750.000	58.419
11800.000	58.419
11850.000	58.419
11900.000	58.419
11950.000	58.419
12000.000	58.419
12050.000	58.419
12100.000	58.419
12150.000	58.419
12200.000	58.419
12250.000	58.419
12300.000	58.419
12350.000	58.419
12400.000	58.419
12450.000	58.419
12500.000	58.419
12550.000	58.419
12600.000	58.419
12650.000	58.419
12700.000	58.419
12750.000	58.419
12800.000	58.419
12850.000	58.419
12900.000	58.419
12950.000	58.419
13000.000	58.419
13050.000	58.419
13100.000	58.419
13150.000	58.419
13200.000	58.419
13250.000	58.419
13300.000	58.419
13350.000	58.419
13400.000	58.419
13450.000	58.419
13500.000	58.419
13550.000	58.419
13600.000	58.419
13650.000	58.419
13700.000	58.419
13750.000	58.419
13800.000	58.419
13850.000	58.419
13900.000	58.419
13950.000	58.419
14000.000	58.419
14050.000	58.419
14100.000	58.419
14150.000	58.419
14200.000	58.419
14250.000	58.419
14300.000	58.419
14350.000	58.419
14400.000	58.508
14450.000	58.508
14500.000	58.508
14550.000	58.508
14600.000	58.508
14650.000	58.508
14700.000	58.508
14750.000	58.508
14800.000	58.508
14850.000	58.508
14900.000	58.508
14950.000	58.508
15000.000	58.508
15050.000	58.508
15100.000	58.508
15150.000	58.508
15200.000	58.508
15250.000	58.508
15300.000	58.508
15350.000	58.508
15400.000	58.508
15450.000	58.508
15500.000	58.508
15550.000	58.508
15600.000	58.508
15650.000	58.508
15700.000	58.508
15750.000	58.508
15800.000	58.508
15850.000	58.508
15900.000	58.508
15950.000	58.508
16000.000	58.508
16050.000	58.508
16100.000	58.508
16150.000	58.508
16200.000	58.508
16250.000	58.508
16300.000	58.508
16350.000	58.508
16400.000	58.508
16450.000	58.508
16500.000	58.508
16550.000	58.508
16600.000	58.508
16650.000	58.508
16700.000	58.508
16750.000	58.508
16800.000	58.508
16850.000	58.508
16900.000	58.508
16950.000	58.508
17000.000	58.508
17050.000	58.508
17100.000	58.508
17150.000	58.508
17200.000	58.508
17250.000	58.508
17300.000	58.508
17350.000	58.508
17400.000	58.508
17450.000	58.508
17500.000	58.508
17550.000	58.508
17600.000	58.508
17650.000	58.508
17700.000	58.508
17750.000	58.508
17800.000	58.508
17850.000	58.508
17900.000	58.508
17950.000	58.508
18000.000	58.508
18050.000	58.508
18100.000	58.508
18150.000	58.508
18200.000	58.508
18250.000	58.508
18300.000	58.508
18350.000	58.508
18400.000	58.508
18450.000	58.508
18500.000	58.508
18550.000	58.508
18600.000	58.508
18650.000	58.508
18700.000	58.508
18750.000	58.508
18800.000	58.508
18850.000	58.508
18900.000	58.508
18950.000	58.508
19000.000	58.508
19050.000	58.508
19100.000	58.508
19150.000	58.508
19200.000	58.602
19250.000	58.602
19300.000	58.602
19350.000	58.602
19400.000	58.602
19450.000	58.602
19500.000	58.602
19550.000	58.602
19600.000	58.602
19650.000	58.602
19700.000	58.602
19750.000	58.602
19800.000	58.602
19850.000	58.602
19900.000	58.602
19950.000	58.602
20000.000	58.602
20050.000	58.602
20100.000	58.602
20150.000	58.602
20200.000	58.602
20250.000	58.602
20300.000	58.602
20350.000	58.602
20400.000	58.602
20450.000	58.602
20500.000	58.602
20550.000	58.602
20600.000	58.602
20650.000	58.602
20700.000	58.602
20750.000	58.602
20800.000	58.602
20850.000	58.602
20900.000	58.602
20950.000	58.602
21000.000	58.602
21050.000	58.602
21100.000	58.602
21150.000	58.602
21200.000	58.602
21250.000	58.602
21300.000	58.602
21350.000	58.602
21400.000	58.602
21450.000	58.602
21500.000	58.602
21550.000	58.602
21600.000	58.602
21650.000	58.602
21700.000	58.602
21750.000	58.602
21800.000	58.602
21850.000	58.602
21900.000	58.602
21950.000	58.602
22000.000	58.602
22050.000	58.602
22100.000	58.602
22150.000	58.602
22200.000	58.602
22250.000	58.602
22300.000	58.602
22350.000	58.602
22400.000	58.602
22450.000	58.602
22500.000	58.602
22550.000	58.602
22600.000	58.602
22650.000	58.602
22700.000	58.602
22750.000	58.602
22800.000	58.602
22850.000	58.602
22900.000	58.602
22950.000	58.602
23000.000	58.602
23050.000	58.602
23100.000	58.602
23150.000	58.602
23200.000	58.602
23250.000	58.602
23300.000	58.602
23350.000	58.602
23400.000	58.602
23450.000	58.602
23500.000	58.602
23550.000	58.602
23600.000	58.602
23650.000	58.602
23700.000	58.602
23750.000	58.602
23800.000	58.602
23850.000	58.602
23900.000	58.602
23950.000	58.602
24000.000	58.695
24050.000	58.695
24100.000	58.695
24150.000	58.695
24200.000	58.695
24250.000	58.695
24300.000	58.695
24350.000	58.695
24400.000	58.695
24450.000	58.695
24500.000	58.695
24550.000	58.695
24600.000	58.695
24650.000	58.695
24700.000	58.695
24750.000	58.695
24800.000	58.695
24850.000	58.695
24900.000	58.695
24950.000	58.695
25000.000	58.695
25050.000	58.695
25100.000	58.695
25150.000	58.695
25200.000	58.695
25250.000	58.695
25300.000	58.695
25350.000	58.695
25400.000	58.695
25450.000	58.695
25500.000	58.695
25550.000	58.695
25600.000	58.695
25650.000	58.695
25700.000	58.695
25750.000	58.695
25800.000	58.695
25850.000	58.695
25900.000	58.695
25950.000	58.695
26000.000	58.695
26050.000	58.695
26100.000	58.695
26150.000	58.695
26200.000	58.695
26250.000	58.695
26300.000	58.695
26350.000	58.695
26400.000	58.695
26450.000	58.695
26500.000	58.695
26550.000	58.695
26600.000	58.695
26650.000	58.695
26700.000	58.695
26750.000	58.695
26800.000	58.695
26850.000	58.695
26900.000	58.695
26950.000	58.695
27000.000	58.695
27050.000	58.695
27100.000	58.695
27150.000	58.695
27200.000	58.695
27250.000	58.695
27300.000	58.695
27350.000	58.695
27400.000	58.695
27450.000	58.695
27500.000	58.695
27550.000	58.695
27600.000	58.695
27650.000	58.695
27700.000	58.695
27750.000	58.695
27800.000	58.695
27850.000	58.695
27900.000	58.695
27950.000	58.695
28000.000	58.695
28050.000	58.695
28100.000	58.695
28150.000	58.695
28200.000	58.695
28250.000	58.695
28300.000	58.695
28350.000	58.695
28400.000	58.695
28450.000	58.695
28500.000	58.695
28550.000	58.695
28600.000	58.695
28650.000	58.695
28700.000	58.695
28750.000	58.695
28800.000	58.795
28850.000	58.795
28900.000	58.795
28950.000	58.795
29000.000	58.795
29050.000	58.795
29100.000	58.795
29150.000	58.795
29200.000	58.795
29250.000	58.795
29300.000	58.795
29350.000	58.795
29400.000	58.795
29450.000	58.795
29500.000	58.795
29550.000	58.795
29600.000	58.795
29650.000	58.795
29700.000	58.795
29750.000	58.795
29800.000	58.795
29850.000	58.795
29900.000	58.795
29950.000	58.795
30000.000	58.795
30050.000	58.795
30100.000	58.795
30150.000	58.795
30200.000	58.795
30250.000	58.795
30300.000	58.795
30350.000	58.795
30400.000	58.795
30450.000	58.795
30500.000	58.795
30550.000	58.795
30600.000	58.795
30650.000	58.795
30700.000	58.795
30750.000	58.795
30800.000	58.795
30850.000	58.795
30900.000	58.795
30950.000	58.795
31000.000	58.795
31050.000	58.795
31100.000	58.795
31150.000	58.795
31200.000	58.795
31250.000	58.795
31300.000	58.795
31350.000	58.795
31400.000	58.795
31450.000	58.795
31500.000	58.795
31550.000	58.795
31600.000	58.795
31650.000	58.795
31700.000	58.795
31750.000	58.795
31800.000	58.795
31850.000	58.795
31900.000	58.795
31950.000	58.795
32000.000	58.795
32050.000	58.795
32100.000	58.795
32150.000	58.795
32200.000	58.795
32250.000	58.795
32300.000	58.795
32350.000	58.795
32400.000	58.795
32450.000	58.795
32500.000	58.795
32550.000	58.795
32600.000	58.795
32650.000	58.795
32700.000	58.795
32750.000	58.795
32800.000	58.795
32850.000	58.795
32900.000	58.795
32950.000	58.795
33000.000	58.795
33050.000	58.795
33100.000	58.795
33150.000	58.795
33200.000	58.795
33250.000	58.795
33300.000	58.795
33350.000	58.795
33400.000	58.795
33450.000	58.795
33500.000	58.795
33550.000	58.795
33600.000	58.890
33650.000	58.890
33700.000	58.890
33750.000	58.890
33800.000	58.890
33850.000	58.890
33900.000	58.890
33950.000	58.890
34000.000	58.890
34050.000	58.890
34100.000	58.890
34150.000	58.890
34200.000	58.890
34250.000	58.890
34300.000	58.890
34350.000	58.890
34400.000	58.890
34450.000	58.890
34500.000	58.890
34550.000	58.890
34600.000	58.890
34650.000	58.890
34700.000	58.890
34750.000	58.890
34800.000	58.890
34850.000	58.890
34900.000	58.890
34950.000	58.890
35000.000	58.890
35050.000	58.890
35100.000	58.890
35150.000	58.890
35200.000	58.890
35250.000	58.890
35300.000	58.890
35350.000	58.890
35400.000	58.890
35450.000	58.890
35500.000	58.890
35550.000	58.890
35600.000	58.890
35650.000	58.890
35700.000	58.890
35750.000	58.890
35800.000	58.890
35850.000	58.890
35900.000	58.890
35950.000	58.890
36000.000	58.890
36050.000	58.890
36100.000	58.890
36150.000	58.890
36200.000	58.890
36250.000	58.890
36300.000	58.890
36350.000	58.890
36400.000	58.890
36450.000	58.890
36500.000	58.890
36550.000	58.890
36600.000	58.890
36650.000	58.890
36700.000	58.890
36750.000	58.890
36800.000	58.890
36850.000	58.890
36900.000	58.890
36950.000	58.890
37000.000	58.890
37050.000	58.890
37100.000	58.890
37150.000	58.890
37200.000	58.890
37250.000	58.890
37300.000	58.890
37350.000	58.890
37400.000	58.890
37450.000	58.890
37500.000	58.890
37550.000	58.890
37600.000	58.890
37650.000	58.890
37700.000	58.890
37750.000	58.890
37800.000	58.890
37850.000	58.890
37900.000	58.890
37950.000	58.890
38000.000	58.890
38050.000	58.890
38100.000	58.890
38150.000	58.890
38200.000	58.890
38250.000	58.890
38300.000	58.890
38350.000	58.890
38400.000	58.987
38450.000	58.987
38500.000	58.987
38550.000	58.987
38600.000	58.987
38650.000	58.987
38700.000	58.987
38750.000	58.987
38800.000	58.987
38850.000	58.987
38900.000	58.987
38950.000	58.987
39000.000	58.987
39050.000	58.987
39100.000	58.987
39150.000	58.987
39200.000	58.987
39250.000	58.987
39300.000	58.987
39350.000	58.987
39400.000	58.987
39450.000	58.987
39500.000	58.987
39550.000	58.987
39600.000	58.987
39650.000	58.987
39700.000	58.987
39750.000	58.987
39800.000	58.987
39850.000	58.987
39900.000	58.987
39950.000	58.987
40000.000	58.987
40050.000	58.987
40100.000	58.987
40150.000	58.987
40200.000	58.987
40250.000	58.987
40300.000	58.987
40350.000	58.987
40400.000	58.987
40450.000	58.987
40500.000	58.987
40550.000	58.987
40600.000	58.987
40650.000	58.987
40700.000	58.987
40750.000	58.987
40800.000	58.987
40850.000	58.987
40900.000	58.987
40950.000	58.987
41000.000	58.987
41050.000	58.987
41100.000	58.987
41150.000	58.987
41200.000	58.987
41250.000	58.987
41300.000	58.987
41350.000	58.987
41400.000	58.987
41450.000	58.987
41500.000	58.987
41550.000	58.987
41600.000	58.987
41650.000	58.987
41700.000	58.987
41750.000	58.987
41800.000	58.987
41850.000	58.987
41900.000	58.987
41950.000	58.987
42000.000	58.987
42050.000	58.987
42100.000	58.987
42150.000	58.987
42200.000	58.987
42250.000	58.987
42300.000	58.987
42350.000	58.987
42400.000	58.987
42450.000	58.987
42500.000	58.987
42550.000	58.987
42600.000	58.987
42650.000	58.987
42700.000	58.987
42750.000	58.987
42800.000	58.987
42850.000	58.987
42900.000	58.987
42950.000	58.987
43000.000	58.987
43050.000	58.987
43100.000	58.987
43150.000	58.987
43200.000	59.082
43250.000	59.082
43300.000	59.082
43350.000	59.082
43400.000	59.082
43450.000	59.082
43500.000	59.082
43550.000	59.082
43600.000	59.082
43650.000	59.082
43700.000	59.082
43750.000	59.082
43800.000	59.082
43850.000	59.082
43900.000	59.082
43950.000	59.082
44000.000	59.082
44050.000	59.082
44100.000	59.082
44150.000	59.082
44200.000	59.082
44250.000	59.082
44300.000	59.082
44350.000	59.082
44400.000	59.082
44450.000	59.082
44500.000	59.082
44550.000	59.082
44600.000	59.082
44650.000	59.082
44700.000	59.082
44750.000	59.082
44800.000	59.082
44850.000	59.082
44900.000	59.082
44950.000	59.082
45000.000	59.082
45050.000	59.082
45100.000	59.082
45150.000	59.082
45200.000	59.082
45250.000	59.082
45300.000	59.082
45350.000	59.082
45400.000	59.082
45450.000	59.082
45500.000	59.082
45550.000	59.082
45600.000	59.082
45650.000	59.082
45700.000	59.082
45750.000	59.082
45800.000	59.082
45850.000	59.082
45900.000	59.082
45950.000	59.082
46000.000	59.082
46050.000	59.082
46100.000	59.082
46150.000	59.082
46200.000	59.082
46250.000	59.082
46300.000	59.082
46350.000	59.082
46400.000	59.082
46450.000	59.082
46500.000	59.082
46550.000	59.082
46600.000	59.082
46650.000	59.082
46700.000	59.082
46750.000	59.082
46800.000	59.082
46850.000	59.082
46900.000	59.082
46950.000	59.082
47000.000	59.082
47050.000	59.082
47100.000	59.082
47150.000	59.082
47200.000	59.082
47250.000	59.082
47300.000	59.082
47350.000	59.082
47400.000	59.082
47450.000	59.082
47500.000	59.082
47550.000	59.082
47600.000	59.082
47650.000	59.082
47700.000	59.082
47750.000	59.082
47800.000	59.082
47850.000	59.082
47900.000	59.082
47950.000	59.082
48000.000	59.172
48050.000	59.172
48100.000	59.172
48150.000	59.172
48200.000	59.172
48250.000	59.172
48300.000	59.172
48350.000	59.172
48400.000	59.172
48450.000	59.172
48500.000	59.172
48550.000	59.172
48600.000	59.172
48650.000	59.172
48700.000	59.172
48750.000	59.172
48800.000	59.172
48850.000	59.172
48900.000	59.172
48950.000	59.172
49000.000	59.172
49050.000	59.172
49100.000	59.172
49150.000	59.172
49200.000	59.172
49250.000	59.172
49300.000	59.172
49350.000	59.172
49400.000	59.172
49450.000	59.172
49500.000	59.172
49550.000	59.172
49600.000	59.172
49650.000	59.172
49700.000	59.172
49750.000	59.172
49800.000	59.172
49850.000	59.172
49900.000	59.172
49950.000	59.172
50000.000	59.172
50050.000	59.172
50100.000	59.172
50150.000	59.172
50200.000	59.172
50250.000	59.172
50300.000	59.172
50350.000	59.172
50400.000	59.172
50450.000	59.172
50500.000	59.172
50550.000	59.172
50600.000	59.172
50650.000	59.172
50700.000	59.172
50750.000	59.172
50800.000	59.172
50850.000	59.172
50900.000	59.172
50950.000	59.172
51000.000	59.172
51050.000	59.172
51100.000	59.172
51150.000	59.172
51200.000	59.172
51250.000	59.172
51300.000	59.172
51350.000	59.172
51400.000	59.172
51450.000	59.172
51500.000	59.172
51550.000	59.172
51600.000	59.172
51650.000	59.172
51700.000	59.172
51750.000	59.172
51800.000	59.172
51850.000	59.172
51900.000	59.172
51950.000	59.172
52000.000	59.172
52050.000	59.172
52100.000	59.172
52150.000	59.172
52200.000	59.172
52250.000	59.172
52300.000	59.172
52350.000	59.172
52400.000	59.172
52450.000	59.172
52500.000	59.172
52550.000	59.172
52600.000	59.172
52650.000	59.172
52700.000	59.172
52750.000	59.172
52800.000	59.257
52850.000	59.257
52900.000	59.257
52950.000	59.257
53000.000	59.257
53050.000	59.257
53100.000	59.257
53150.000	59.257
53200.000	59.257
53250.000	59.257
53300.000	59.257
53350.000	59.257
53400.000	59.257
53450.000	59.257
53500.000	59.257
53550.000	59.257
53600.000	59.257
53650.000	59.257
53700.000	59.257
53750.000	59.257
53800.000	59.257
53850.000	59.257
53900.000	59.257
53950.000	59.257
54000.000	59.257
54050.000	59.257
54100.000	59.257
54150.000	59.257
54200.000	59.257
54250.000	59.257
54300.000	59.257
54350.000	59.257
54400.000	59.257
54450.000	59.257
54500.000	59.257
54550.000	59.257
54600.000	59.257
54650.000	59.257
54700.000	59.257
54750.000	59.257
54800.000	59.257
54850.000	59.257
54900.000	59.257
54950.000	59.257
55000.000	59.257
55050.000	59.257
55100.000	59.257
55150.000	59.257
55200.000	59.257
55250.000	59.257
55300.000	59.257
55350.000	59.257
55400.000	59.257
55450.000	59.257
55500.000	59.257
55550.000	59.257
55600.000	59.257
55650.000	59.257
55700.000	59.257
55750.000	59.257
55800.000	59.257
55850.000	59.257
55900.000	59.257
55950.000	59.257
56000.000	59.257
56050.000	59.257
56100.000	59.257
56150.000	59.257
56200.000	59.257
56250.000	59.257
56300.000	59.257
56350.000	59.257
56400.000	59.257
56450.000	59.257
56500.000	59.257
56550.000	59.257
56600.000	59.257
56650.000	59.257
56700.000	59.257
56750.000	59.257
56800.000	59.257
56850.000	59.257
56900.000	59.257
56950.000	59.257
57000.000	59.257
57050.000	59.257
57100.000	59.257
57150.000	59.257
57200.000	59.257
57250.000	59.257
57300.000	59.257
57350.000	59.257
57400.000	59.257
57450.000	59.257
57500.000	59.257
57550.000	59.257
57600.000	59.344
57650.000	59.344
57700.000	59.344
57750.000	59.344
57800.000	59.344
57850.000	59.344
57900.000	59.344
57950.000	59.344
58000.000	59.344
58050.000	59.344
58100.000	59.344
58150.000	59.344
58200.000	59.344
58250.000	59.344
58300.000	59.344
58350.000	59.344
58400.000	59.344
58450.000	59.344
58500.000	59.344
58550.000	59.344
58600.000	59.344
58650.000	59.344
58700.000	59.344
58750.000	59.344
58800.000	59.344
58850.000	59.344
58900.000	59.344
58950.000	59.344
59000.000	59.344
59050.000	59.344
59100.000	59.344
59150.000	59.344
59200.000	59.344
59250.000	59.344
59300.000	59.344
59350.000	59.344
59400.000	59.344
59450.000	59.344
59500.000	59.344
59550.000	59.344
59600.000	59.344
59650.000	59.344
59700.000	59.344
59750.000	59.344
59800.000	59.344
59850.000	59.344
59900.000	59.344
59950.000	59.344
60000.000	59.344
60050.000	59.344
60100.000	59.344
60150.000	59.344
60200.000	59.344
60250.000	59.344
60300.000	59.344
60350.000	59.344
60400.000	59.344
60450.000	59.344
60500.000	59.344
60550.000	59.344
60600.000	59.344
60650.000	59.344
60700.000	59.344
60750.000	59.344
60800.000	59.344
60850.000	59.344
60900.000	59.344
60950.000	59.344
61000.000	59.344
61050.000	59.344
61100.000	59.344
61150.000	59.344
61200.000	59.344
61250.000	59.344
61300.000	59.344
61350.000	59.344
61400.000	59.344
61450.000	59.344
61500.000	59.344
61550.000	59.344
61600.000	59.344
61650.000	59.344
61700.000	59.344
61750.000	59.344
61800.000	59.344
61850.000	59.344
61900.000	59.344
61950.000	59.344
62000.000	59.344
62050.000	59.344
62100.000	59.344
62150.000	59.344
62200.000	59.344
62250.000	59.344
62300.000	59.344
62350.000	59.344
62400.000	59.434
62450.000	59.434
62500.000	59.434
62550.000	59.434
62600.000	59.434
62650.000	59.434
62700.000	59.434
62750.000	59.434
62800.000	59.434
62850.000	59.434
62900.000	59.434
62950.000	59.434
63000.000	59.434
63050.000	59.434
63100.000	59.434
63150.000	59.434
63200.000	59.434
63250.000	59.434
63300.000	59.434
63350.000	59.434
63400.000	59.434
63450.000	59.434
63500.000	59.434
63550.000	59.434
63600.000	59.434
63650.000	59.434
63700.000	59.434
63750.000	59.434
63800.000	59.434
63850.000	59.434
63900.000	59.434
63950.000	59.434
64000.000	59.434
64050.000	59.434
64100.000	59.434
64150.000	59.434
64200.000	59.434
64250.000	59.434
64300.000	59.434
64350.000	59.434
64400.000	59.434
64450.000	59.434
64500.000	59.434
64550.000	59.434
64600.000	59.434
64650.000	59.434
64700.000	59.434
64750.000	59.434
64800.000	59.434
64850.000	59.434
64900.000	59.434
64950.000	59.434
65000.000	59.434
65050.000	59.434
65100.000	59.434
65150.000	59.434
65200.000	59.434
65250.000	59.434
65300.000	59.434
65350.000	59.434
65400.000	59.434
65450.000	59.434
65500.000	59.434
65550.000	59.434
65600.000	59.434
65650.000	59.434
65700.000	59.434
65750.000	59.434
65800.000	59.434
65850.000	59.434
65900.000	59.434
65950.000	59.434
66000.000	59.434
66050.000	59.434
66100.000	59.434
66150.000	59.434
66200.000	59.434
66250.000	59.434
66300.000	59.434
66350.000	59.434
66400.000	59.434
66450.000	59.434
66500.000	59.434
66550.000	59.434
66600.000	59.434
66650.000	59.434
66700.000	59.434
66750.000	59.434
66800.000	59.434
66850.000	59.434
66900.000	59.434
66950.000	59.434
67000.000	59.434
67050.000	59.434
67100.000	59.434
67150.000	59.434
67200.000	59.533
67250.000	59.533
67300.000	59.533
67350.000	59.533
67400.000	59.533
67450.000	59.533
67500.000	59.533
67550.000	59.533
67600.000	59.533
67650.000	59.533
67700.000	59.533
67750.000	59.533
67800.000	59.533
67850.000	59.533
67900.000	59.533
67950.000	59.533
68000.000	59.533
68050.000	59.533
68100.000	59.533
68150.000	59.533
68200.000	59.533
68250.000	59.533
68300.000	59.533
68350.000	59.533
68400.000	59.533
68450.000	59.533
68500.000	59.533
68550.000	59.533
68600.000	59.533
68650.000	59.533
68700.000	59.533
68750.000	59.533
68800.000	59.533
68850.000	59.533
68900.000	59.533
68950.000	59.533
69000.000	59.533
69050.000	59.533
69100.000	59.533
69150.000	59.533
69200.000	59.533
69250.000	59.533
69300.000	59.533
69350.000	59.533
69400.000	59.533
69450.000	59.533
69500.000	59.533
69550.000	59.533
69600.000	59.533
69650.000	59.533
69700.000	59.533
69750.000	59.533
69800.000	59.533
69850.000	59.533
69900.000	59.533
69950.000	59.533
70000.000	59.533
70050.000	59.533
70100.000	59.533
70150.000	59.533
70200.000	59.533
70250.000	59.533
70300.000	59.533
70350.000	59.533
70400.000	59.533
70450.000	59.533
70500.000	59.533
70550.000	59.533
70600.000	59.533
70650.000	59.533
70700.000	59.533
70750.000	59.533
70800.000	59.533
70850.000	59.533
70900.000	59.533
70950.000	59.533
71000.000	59.533
71050.000	59.533
71100.000	59.533
71150.000	59.533
71200.000	59.533
71250.000	59.533
71300.000	59.533
71350.000	59.533
71400.000	59.533
71450.000	59.533
71500.000	59.533
71550.000	59.533
71600.000	59.533
71650.000	59.533
71700.000	59.533
71750.000	59.533
71800.000	59.533
71850.000	59.533
71900.000	59.533
71950.000	59.533
72000.000	59.628
72050.000	59.628
72100.000	59.628
72150.000	59.628
72200.000	59.628
72250.000	59.628
72300.000	59.628
72350.000	59.628
72400.000	59.628
72450.000	59.628
72500.000	59.628
72550.000	59.628
72600.000	59.628
72650.000	59.628
72700.000	59.628
72750.000	59.628
72800.000	59.628
72850.000	59.628
72900.000	59.628
72950.000	59.628
73000.000	59.628
73050.000	59.628
73100.000	59.628
73150.000	59.628
73200.000	59.628
73250.000	59.628
73300.000	59.628
73350.000	59.628
73400.000	59.628
73450.000	59.628
73500.000	59.628
73550.000	59.628
73600.000	59.628
73650.000	59.628
73700.000	59.628
73750.000	59.628
73800.000	59.628
73850.000	59.628
73900.000	59.628
73950.000	59.628
74000.000	59.628
74050.000	59.628
74100.000	59.628
74150.000	59.628
74200.000	59.628
74250.000	59.628
74300.000	59.628
74350.000	59.628
74400.000	59.628
74450.000	59.628
74500.000	59.628
74550.000	59.628
74600.000	59.628
74650.000	59.628
74700.000	59.628
74750.000	59.628
74800.000	59.628
74850.000	59.628
74900.000	59.628
74950.000	59.628
75000.000	59.628
75050.000	59.628
75100.000	59.628
75150.000	59.628
75200.000	59.628
75250.000	59.628
75300.000	59.628
75350.000	59.628
75400.000	59.628
75450.000	59.628
75500.000	59.628
75550.000	59.628
75600.000	59.628
75650.000	59.628
75700.000	59.628
75750.000	59.628
75800.000	59.628
75850.000	59.628
75900.000	59.628
75950.000	59.628
76000.000	59.628
76050.000	59.628
76100.000	59.628
76150.000	59.628
76200.000	59.628
76250.000	59.628
76300.000	59.628
76350.000	59.628
76400.000	59.628
76450.000	59.628
76500.000	59.628
76550.000	59.628
76600.000	59.628
76650.000	59.628
76700.000	59.628
76750.000	59.628
76800.000	59.720
76850.000	59.720
76900.000	59.720
76950.000	59.720
77000.000	59.720
77050.000	59.720
77100.000	59.720
77150.000	59.720
77200.000	59.720
77250.000	59.720
77300.000	59.720
77350.000	59.720
77400.000	59.720
77450.000	59.720
77500.000	59.720
77550.000	59.720
77600.000	59.720
77650.000	59.720
77700.000	59.720
77750.000	59.720
77800.000	59.720
77850.000	59.720
77900.000	59.720
77950.000	59.720
78000.000	59.720
78050.000	59.720
78100.000	59.720
78150.000	59.720
78200.000	59.720
78250.000	59.720
78300.000	59.720
78350.000	59.720
78400.000	59.720
78450.000	59.720
78500.000	59.720
78550.000	59.720
78600.000	59.720
78650.000	59.720
78700.000	59.720
78750.000	59.720
78800.000	59.720
78850.000	59.720
78900.000	59.720
78950.000	59.720
79000.000	59.720
79050.000	59.720
79100.000	59.720
79150.000	59.720
79200.000	59.720
79250.000	59.720
79300.000	59.720
79350.000	59.720
79400.000	59.720
79450.000	59.720
79500.000	59.720
79550.000	59.720
79600.000	59.720
79650.000	59.720
79700.000	59.720
79750.000	59.720
79800.000	59.720
79850.000	59.720
79900.000	59.720
79950.000	59.720
80000.000	59.720
80050.000	59.720
80100.000	59.720
80150.000	59.720
80200.000	59.720
80250.000	59.720
80300.000	59.720
80350.000	59.720
80400.000	59.720
80450.000	59.720
80500.000	59.720
80550.000	59.720
80600.000	59.720
80650.000	59.720
80700.000	59.720
80750.000	59.720
80800.000	59.720
80850.000	59.720
80900.000	59.720
80950.000	59.720
81000.000	59.720
81050.000	59.720
81100.000	59.720
81150.000	59.720
81200.000	59.720
81250.000	59.720
81300.000	59.720
81350.000	59.720
81400.000	59.720
81450.000	59.720
81500.000	59.720
81550.000	59.720
81600.000	59.810
81650.000	59.810
81700.000	59.810
81750.000	59.810
81800.000	59.810
81850.000	59.810
81900.000	59.810
81950.000	59.810
82000.000	59.810
82050.000	59.810
82100.000	59.810
82150.000	59.810
82200.000	59.810
82250.000	59.810
82300.000	59.810
82350.000	59.810
82400.000	59.810
82450.000	59.810
82500.000	59.810
82550.000	59.810
82600.000	59.810
82650.000	59.810
82700.000	59.810
82750.000	59.810
82800.000	59.810
82850.000	59.810
82900.000	59.810
82950.000	59.810
83000.000	59.810
83050.000	59.810
83100.000	59.810
83150.000	59.810
83200.000	59.810
83250.000	59.810
83300.000	59.810
83350.000	59.810
83400.000	59.810
83450.000	59.810
83500.000	59.810
83550.000	59.810
83600.000	59.810
83650.000	59.810
83700.000	59.810
83750.000	59.810
83800.000	59.810
83850.000	59.810
83900.000	59.810
83950.000	59.810
84000.000	59.810
84050.000	59.810
84100.000	59.810
84150.000	59.810
84200.000	59.810
84250.000	59.810
84300.000	59.810
84350.000	59.810
84400.000	59.810
84450.000	59.810
84500.000	59.810
84550.000	59.810
84600.000	59.810
84650.000	59.810
84700.000	59.810
84750.000	59.810
84800.000	59.810
84850.000	59.810
84900.000	59.810
84950.000	59.810
85000.000	59.810
85050.000	59.810
85100.000	59.810
85150.000	59.810
85200.000	59.810
85250.000	59.810
85300.000	59.810
85350.000	59.810
85400.000	59.810
85450.000	59.810
85500.000	59.810
85550.000	59.810
85600.000	59.810
85650.000	59.810
85700.000	59.810
85750.000	59.810
85800.000	59.810
85850.000	59.810
85900.000	59.810
85950.000	59.810
86000.000	59.810
86050.000	59.810
86100.000	59.810
86150.000	59.810
86200.000	59.810
86250.000	59.810
86300.000	59.810
86350.000	59.810
86400.000	59.901
86450.000	59.901
86500.000	59.901
86550.000	59.901
86600.000	59.901
86650.000	59.901
86700.000	59.901
86750.000	59.901
86800.000	59.901
86850.000	59.901
86900.000	59.901
86950.000	59.901
87000.000	59.901
87050.000	59.901
87100.000	59.901
87150.000	59.901
87200.000	59.901
87250.000	59.901
87300.000	59.901
87350.000	59.901
87400.000	59.901
87450.000	59.901
87500.000	59.901
87550.000	59.901
87600.000	59.901
87650.000	59.901
87700.000	59.901
87750.000	59.901
87800.000	59.901
87850.000	59.901
87900.000	59.901
87950.000	59.901
88000.000	59.901
88050.000	59.901
88100.000	59.901
88150.000	59.901
88200.000	59.901
88250.000	59.901
88300.000	59.901
88350.000	59.901
88400.000	59.901
88450.000	59.901
88500.000	59.901
88550.000	59.901
88600.000	59.901
88650.000	59.901
88700.000	59.901
88750.000	59.901
88800.000	59.901
88850.000	59.901
88900.000	59.901
88950.000	59.901
89000.000	59.901
89050.000	59.901
89100.000	59.901
89150.000	59.901
89200.000	59.901
89250.000	59.901
89300.000	59.901
89350.000	59.901
89400.000	59.901
89450.000	59.901
89500.000	59.901
89550.000	59.901
89600.000	59.901
89650.000	59.901
89700.000	59.901
89750.000	59.901
89800.000	59.901
89850.000	59.901
89900.000	59.901
89950.000	59.901
90000.000	59.901
90050.000	59.901
90100.000	59.901
90150.000	59.901
90200.000	59.901
90250.000	59.901
90300.000	59.901
90350.000	59.901
90400.000	59.901
90450.000	59.901
90500.000	59.901
90550.000	59.901
90600.000	59.901
90650.000	59.901
90700.000	59.901
90750.000	59.901
90800.000	59.901
90850.000	59.901
90900.000	59.901
90950.000	59.901
91000.000	59.901
91050.000	59.901
91100.000	59.901
91150.000	59.901
91200.000	59.990
91250.000	59.990
91300.000	59.990
91350.000	59.990
91400.000	59.990
91450.000	59.990
91500.000	59.990
91550.000	59.990
91600.000	59.990
91650.000	59.990
91700.000	59.990
91750.000	59.990
91800.000	59.990
91850.000	59.990
91900.000	59.990
91950.000	59.990
92000.000	59.990
92050.000	59.990
92100.000	59.990
92150.000	59.990
92200.000	59.990
92250.000	59.990
92300.000	59.990
92350.000	59.990
92400.000	59.990
92450.000	59.990
92500.000	59.990
92550.000	59.990
92600.000	59.990
92650.000	59.990
92700.000	59.990
92750.000	59.990
92800.000	59.990
92850.000	59.990
92900.000	59.990
92950.000	59.990
93000.000	59.990
93050.000	59.990
93100.000	59.990
93150.000	59.990
93200.000	59.990
93250.000	59.990
93300.000	59.990
93350.000	59.990
93400.000	59.990
93450.000	59.990
93500.000	59.990
93550.000	59.990
93600.000	59.990
93650.000	59.990
93700.000	59.990
93750.000	59.990
93800.000	59.990
93850.000	59.990
93900.000	59.990
93950.000	59.990
94000.000	59.990
94050.000	59.990
94100.000	59.990
94150.000	59.990
94200.000	59.990
94250.000	59.990
94300.000	59.990
94350.000	59.990
94400.000	59.990
94450.000	59.990
94500.000	59.990
94550.000	59.990
94600.000	59.990
94650.000	59.990
94700.000	59.990
94750.000	59.990
94800.000	59.990
94850.000	59.990
94900.000	59.990
94950.000	59.990
95000.000	59.990
95050.000	59.990
95100.000	59.990
95150.000	59.990
95200.000	59.990
95250.000	59.990
95300.000	59.990
95350.000	59.990
95400.000	59.990
95450.000	59.990
95500.000	59.990
95550.000	59.990
95600.000	59.990
95650.000	59.990
95700.000	59.990
95750.000	59.990
95800.000	59.990
95850.000	59.990
95900.000	59.990
95950.000	59.990
96000.000	60.079
96050.000	60.079
96100.000	60.079
96150.000	60.079
96200.000	60.079
96250.000	60.079
96300.000	60.079
96350.000	60.079
96400.000	60.079
96450.000	60.079
96500.000	60.079
96550.000	60.079
96600.000	60.079
96650.000	60.079
96700.000	60.079
96750.000	60.079
96800.000	60.079
96850.000	60.079
96900.000	60.079
96950.000	60.079
97000.000	60.079
97050.000	60.079
97100.000	60.079
97150.000	60.079
97200.000	60.079
97250.000	60.079
97300.000	60.079
97350.000	60.079
97400.000	60.079
97450.000	60.079
97500.000	60.079
97550.000	60.079
97600.000	60.079
97650.000	60.079
97700.000	60.079
97750.000	60.079
97800.000	60.079
97850.000	60.079
97900.000	60.079
97950.000	60.079
98000.000	60.079
98050.000	60.079
98100.000	60.079
98150.000	60.079
98200.000	60.079
98250.000	60.079
98300.000	60.079
98350.000	60.079
98400.000	60.079
98450.000	60.079
98500.000	60.079
98550.000	60.079
98600.000	60.079
98650.000	60.079
98700.000	60.079
98750.000	60.079
98800.000	60.079
98850.000	60.079
98900.000	60.079
98950.000	60.079
99000.000	60.079
99050.000	60.079
99100.000	60.079
99150.000	60.079
99200.000	60.079
99250.000	60.079
99300.000	60.079
99350.000	60.079
99400.000	60.079
99450.000	60.079
99500.000	60.079
99550.000	60.079
99600.000	60.079
99650.000	60.079
99700.000	60.079
99750.000	60.079
99800.000	60.079
99850.000	60.079
99900.000	60.079
[truncated: 40,529 more rows]
